# Supplementary material for: Rh-catalyzed decarbonylation of conjugated ynones via carbon–alkyne bond activation: reaction scope and mechanistic exploration via DFT calculations
Source: PubMed Central journal article supplement (PMC4517480; doi:10.1039/c5sc00584a), 2015-03-31
Supplement: NIHMS691898-supplement-supporting_information.pdf [file NIHMS691898-supplement-supporting_information.pdf]

## Supporting Information

### **Rh-Catalyzed Decarbonylation of Conjugated Ynones via Carbon–Alkyne Bond Activation: Reaction Scope and Mechanistic Exploration via DFT Calculations**

Alpay Dermenci<sup>†Δ</sup>, Rachel E. Whittaker<sup>†Δ</sup>, Yang Gao<sup>‡§</sup>, Faben Cruz<sup>Δ</sup>, Zhi-Xiang Yu<sup>\*\*</sup>, and Guangbin Dong<sup>\*Δ</sup>

<sup>Δ</sup> The University of Texas at Austin, Department of Chemistry, Austin, TX 78712, United States  
Current Address: Pfizer Inc., Eastern Point Road, Groton, CT 06340, United States

<sup>†</sup> AD and REW contributed equally

<sup>‡</sup> Beijing National Laboratory of Molecular Sciences (BNLMS), Key Laboratory of Bioorganic Chemistry and Molecular Engineering, College of Chemistry, Peking University, Beijing, 100871, China

<sup>§</sup> Key Laboratory of Pesticide & Chemical Biology, Ministry of Education, College of Chemistry, Central China Normal University, Hubei, Wuhan 430079, China

### **Section 1: Experimental Details**

**Page S2: General Information**

**Page S3: Additional Screening Data (Table S1)**

**Page S3-S21: Characterization Data for Substrates and Products**

**Page S22: Cycloisomerization to Furan Product (Scheme S1)**

**Page S22-S23: References**

### **Section 2: Computational details**

**Page S24: Part I. Computed Energies of All Stationary Points**

**Page S26: Part II.**

**Page S26: Discussion of Different Structures of INT1-A**

**Page S27: Discussion of TS1**

**Page S28: Discussion of the Difference of Reactivities between Different Ligands: Xantphos vs dppp**

**Page S29-S137: Part III. Coordinates of All Stationary Points**

**Page S29-S78: Coordinates of all stationary points in figure 2**

**Page S79-S83: Coordinates of TS3-A-I versus TS3-A-II**

**Page S84-S92: Coordinates of TS3-deCO versus TS3-A**

**Page S93-S130: Coordinates of all stationary points of 1t in figure 3**

**Page S131-S137: Coordinates of radical structures in figure 4**

**Page S138-S150: Coordinates of radical structures in figure S1**

**Page S151-S172: Coordinates of radical structures in figure S2**

**Page S173-S205: Coordinates of radical structures in figure S3**

### **Section 3: NMR Spectra**

**Page S206-S263: <sup>1</sup>H and <sup>13</sup>C NMR Spectra**

## **Section 1: Experimental Details**

### **General Information**

Unless otherwise noted, all experiments were carried out under an inert atmosphere in a nitrogen-filled glovebox or by standard Schlenk techniques. Dichloromethane (CH<sub>2</sub>Cl<sub>2</sub>) was purified using a Pure-Solv MD-5 Solvent Purification System (Innovative Technology). Tetrahydrofuran (THF) was distilled over Na prior to use. Chlorobenzene, xylenes, and ethyl benzene were distilled over CaH<sub>2</sub> and degassed via freeze-pump-thaw (3x) and stored in the glovebox prior to use. All other reagents were used directly from the supplier without further purification unless noted. 4-phenylbut-3-yn-2-one **7p** bought from TCI America. Glass reaction vessels were either flame-dried or dried in the oven (140 °C) overnight. Analytical thin-layer chromatography (TLC) was carried out using 0.2 mm commercial silica gel plates (silica gel 60, F254, EMD chemical). Infrared spectra were recorded on a Nicolet 380 FTIR using neat thin film technique.

High-resolution mass spectra (HRMS) were obtained on a Karatos MS9 and are reported as m/z (relative intensity). Accurate masses are reported for the molecular ion [M+Na]<sup>+</sup>, [M+H]<sup>+</sup>, or [M+]. Nuclear magnetic resonance spectra (<sup>1</sup>H NMR and <sup>13</sup>C NMR) were recorded with a Varian Gemini (400 MHz, <sup>1</sup>H at 400 MHz, <sup>13</sup>C at 100 MHz). For CDCl<sub>3</sub> solutions the chemical shifts are reported as parts per million (ppm) referenced to residual protium or carbon of the solvents; CDCl<sub>3</sub> δ <sup>1</sup>H (7.26 ppm) and CDCl<sub>3</sub> δ <sup>13</sup>C (77.0 ppm). Coupling constants are reported in Hertz (Hz). Data for <sup>1</sup>H NMR spectra are reported as follows: chemical shift (ppm, referenced to protium; s = singlet, d = doublet, t = triplet, q = quartet, sep = septet, dd = doublet of doublets, dq = doublet of quartets, td = triplet of doublets, tt = triplet of triplets, qd = quartet of doublets, ddd = doublet of doublet of doublets, m = multiplet, coupling constant (Hz), and integration). Ligand

abbreviations: triphos = Bis(diphenylphosphinoethyl)phenylphosphine, BINAP = 2, 2'-Bis(diphenylphosphino)-1,1'-binaphthyl, Xantphos= 4,5-Bis(diphenylphosphino)-9,9'-dimethylxanthene, dppf = 1,1'-Bis(diphenylphosphino)ferrocene.

Table S1: Additional Screening for Conditions

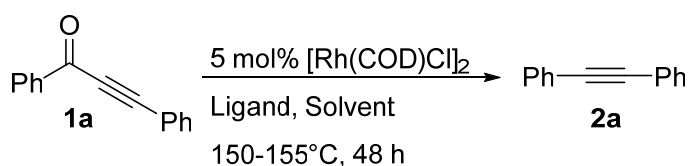

| Entry | Ligand (12 mol%)  | Solvent                    | Additive (mol%)                                                                    | Yield <sup>a</sup> |
|-------|-------------------|----------------------------|------------------------------------------------------------------------------------|--------------------|
| 1     | triphos           | xylenes                    | -                                                                                  | <5%                |
| 2     | BINAP             | xylenes                    | -                                                                                  | <5%                |
| 3     | - <sup>b</sup>    | xylenes                    | -                                                                                  | 43% (82%)          |
| 4     | Xantphos (16%)    | xylenes                    | -                                                                                  | 40%                |
| 5     | Xantphos (20%)    | xylenes                    | -                                                                                  | 55%                |
| 6     | dppf              | <i>n</i> Bu <sub>2</sub> O | -                                                                                  | NR                 |
| 7     | dppf              | <i>n</i> Bu <sub>2</sub> O | ZnCl <sub>2</sub> (20)                                                             | NR                 |
| 8     | dppf              | <i>n</i> Bu <sub>2</sub> O | In(OTf) <sub>3</sub> (20)                                                          | NR                 |
| 9     | dppf              | <i>n</i> Bu <sub>2</sub> O | YbCl <sub>3</sub> (20)                                                             | Decomp.            |
| 10    | dppf              | xylenes                    | Ph <sub>3</sub> B (20)                                                             | NR                 |
| 11    | dppf              | xylenes                    | RuCl <sub>2</sub> (PPh <sub>3</sub> ) <sub>3</sub> (10) <sup>c</sup>               | NR                 |
| 12    | dppf              | xylenes                    | [Ru(C <sub>6</sub> H <sub>6</sub> )Cl <sub>2</sub> ] <sub>2</sub> (5) <sup>c</sup> | NR                 |
| 13    | dppf              | xylenes                    | [( <i>p</i> -cymene)RuCl <sub>2</sub> ] <sub>2</sub> (5) <sup>c</sup>              | NR                 |
| 14    | dppf <sup>d</sup> | xylenes                    | -                                                                                  | NR                 |
| 15    | dppf <sup>e</sup> | xylenes                    | -                                                                                  | NR                 |

<sup>a</sup> Isolated yields; Percent in parentheses is yield based on recovered starting material, <sup>b</sup> Pre-formed RhXantphos(COD)Cl was used as the catalyst, <sup>c</sup> [Ru] used as co-catalyst with [Rh(COD)Cl]<sub>2</sub> <sup>d</sup> [Rh(COE)<sub>2</sub>Cl]<sub>2</sub> was used as the pre-catalyst, <sup>e</sup> [Rh(C<sub>2</sub>H<sub>4</sub>)<sub>2</sub>Cl]<sub>2</sub> was used as the pre-catalyst

## General Procedure A:<sup>1</sup>

### Preparation of 1,3-diphenylprop-2-yn-1-one (1a)<sup>2</sup>

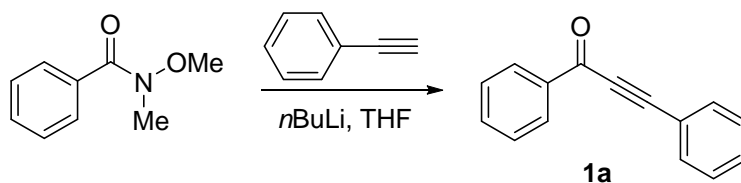

To a stirring solution of phenylacetylene (1.79 g, 17.48 mmol) in THF (10 mL) at  $-78\text{ }^{\circ}\text{C}$  was added *n*-BuLi (2.5 M, 6.99 mL). The reaction was stirred 15 min at  $0\text{ }^{\circ}\text{C}$  and added to a solution of Weinreb amide (2.75 g, 16.65 mmol) in THF (20 mL) at  $-78\text{ }^{\circ}\text{C}$ . The reaction was warmed to r.t. and stirred for 3 hours. The reaction was quenched with  $\text{H}_2\text{O}$  and extracted with  $\text{Et}_2\text{O}$ . The combined organic layers were washed with  $\text{NaHCO}_3$ ,  $\text{H}_2\text{O}$ , brine, dried over  $\text{Na}_2\text{SO}_4$  and concentrated under reduced pressure. The crude material was purified via silica gel column chromatography (10:1  $\rightarrow$  3:1 hexanes:EtOAc) to give a white solid in 85% yield (2.91 g).

$^1\text{H}$  NMR (400 MHz,  $\text{CDCl}_3$ ):  $\delta$  8.25-8.22 (m, 2H), 7.72-7.69 (m, 2H), 7.63 (tt,  $J = 7.2, 1.4$  Hz, 1H), 7.55-7.41 (m, 5H). Mass calculated  $[\text{M}+\text{H}]^+$ : 207.0810, HRMS  $[\text{M}+\text{H}]^+$ : 207.0808.

The following compounds were prepared using General Procedure A. **1a-1d**, **1m-1n**, **1q**, **3a-3b**, **3e**, **3j-3l**, **3n-3o**, and **13** are known compounds from literature.

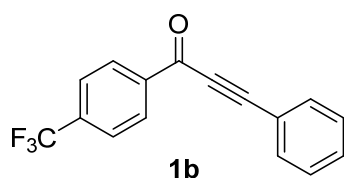

275.0684.

**3-phenyl-1-(4-(trifluoromethyl)phenyl)prop-2-yn-1-one (1b)**<sup>3</sup>

Isolated as a white solid (859 mg, 3.13 mmol, 79%).  $^1\text{H}$  NMR (400 MHz,  $\text{CDCl}_3$ ):  $\delta$  8.32 (d,  $J = 8.0$  Hz, 2H), 7.79 (d,  $J = 8.4$  Hz, 2H), 7.69 (dt,  $J = 6.6, 1.6$  Hz, 2H), 7.52 (tt,  $J = 6.4, 1.2$  Hz, 1H), 7.46-7.43 (m, 3H). Mass calculated  $[\text{M}+\text{H}]^+$ : 275.0684, HRMS  $[\text{M}+\text{H}]^+$ :

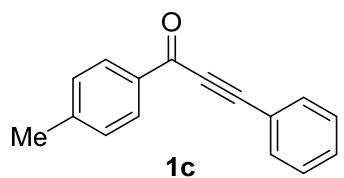

**3-phenyl-1-(p-tolyl)prop-2-yn-1-one (1c)**<sup>4</sup>

Isolated as a white solid (159 mg, 0.72 mmol, 60%).  $^1\text{H}$  NMR (400 MHz,  $\text{CDCl}_3$ ):  $\delta$  8.12 (dt,  $J = 8.0, 1.6$  Hz, 2H), 7.69 (dt,  $J = 7.2, 1.2$  Hz, 2H), 7.50-7.40 (m, 3H), 7.31 (d,  $J = 8.4$  Hz, 2H), 2.45 (s, 3H). Mass calculated  $[\text{M}^+]$ : 220.0888, HRMS  $[\text{M}^+]$ : 220.0890.

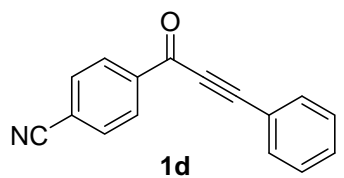

231.0685.

**4-(3-phenylpropioloyl)benzonitrile (1d)**<sup>5</sup>

Isolated as a white solid (354 mg, 1.53 mmol, 49%).  $^1\text{H}$  NMR (400 MHz,  $\text{CDCl}_3$ ):  $\delta$  8.31 (dt,  $J = 8.4, 1.6$  Hz, 2H), 7.83 (dt,  $J = 8.4, 1.6$  Hz, 2H), 7.71-7.69 (m, 2H), 7.53 (tt,  $J = 7.6, 1.2$  Hz, 1H), 7.45 (tt,  $J = 7.6, 1.2$  Hz, 2H). Mass calculated  $[\text{M}^+]$ : 231.0684, HRMS  $[\text{M}^+]$ :

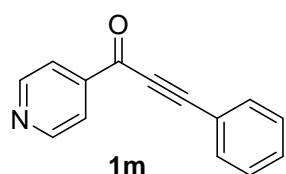

**3-phenyl-1-(pyridin-4-yl)prop-2-yn-1-one (1m)**<sup>12</sup>

Isolated as a yellow solid (188 mg, 0.91 mmol, 76%).  $^1\text{H}$  NMR (400 MHz,  $\text{CDCl}_3$ ):  $\delta$  8.88 (dd,  $J = 4.8, 1.5$  Hz, 2H), 8.00 (dd,  $J = 4.4, 1.7$  Hz, 2H), 7.73-7.70 (m, 2H), 7.56-7.44 (m, 3H). Mass calculated  $[\text{M}+\text{H}]^+$ :

208.0762, HRMS  $[M+H]^+$ : 208.0767.

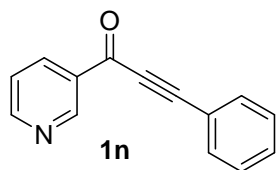

**1,3-diphenylprop-2-yn-1-one (1n)**<sup>13</sup>

Isolated as a pale yellow solid (485 mg, 2.35 mmol, 78%). <sup>1</sup>H NMR (400 MHz, CDCl<sub>3</sub>):  $\delta$  9.44 (d,  $J$  = 2.4 Hz, 1H), 8.84 (dd,  $J$  = 4.8, 1.6 Hz, 1H), 8.42 (dt,  $J$  = 8.0, 2.0 Hz, 1H), 7.69 (d,  $J$  = 6.8 Hz, 2H), 7.53-7.42 (m, 4H). Mass calculated  $[M+H]^+$ : 208.0762, HRMS  $[M+H]^+$ : 208.0767.

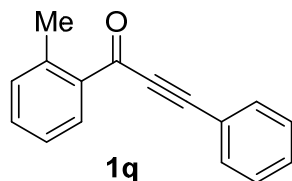

**3-phenyl-1-(o-tolyl)prop-2-yn-1-one (1q)**<sup>40</sup>

Isolated as a yellow oil (687 mg, 3.12 mmol, 56%). <sup>1</sup>H NMR (400 MHz, CDCl<sub>3</sub>):  $\delta$  8.31 (d,  $J$  = 7.0 Hz, 1H), 7.66 (dd,  $J$  = 6.2, 0.6 Hz, 2H), 7.47-7.35 (m, 5H), 7.27 (d,  $J$  = 1.5 Hz, 1H), 2.69 (s, 3H). Mass calculated  $[M+H]^+$ : 332.9776, HRMS  $[M+H]^+$ : 332.9773.

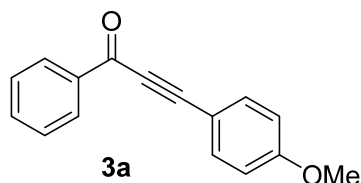

**3-(4-methoxyphenyl)-1-phenylprop-2-yn-1-one (3a)**<sup>40</sup>

Isolated as a white solid (235 mg, 1.00 mmol, 83%). <sup>1</sup>H NMR (400 MHz, CDCl<sub>3</sub>):  $\delta$  8.22 (dd,  $J$  = 8.0, 1.2 Hz, 2H), 7.67-7.61 (m, 3H), 7.52 (td,  $J$  = 4.8, 1.2 Hz, 2H), 6.94 (dt,  $J$  = 6.4, 2.0 Hz, 2H), 3.87 (s, 3H). Mass calculated  $[M+H]^+$ : 237.0916, HRMS  $[M+H]^+$ : 237.0911.

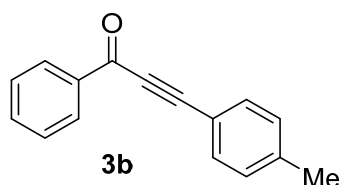

**1-phenyl-3-(p-tolyl)prop-2-yn-1-one (3b)**<sup>41</sup>

Isolated as a white solid (210 mg, 0.96 mmol, 79%). <sup>1</sup>H NMR (400 MHz, CDCl<sub>3</sub>):  $\delta$  8.23 (dd,  $J$  = 8.4, 1.2 Hz, 2H), 7.63-7.59 (m, 3H), 7.52 (td,  $J$  = 8.4, 1.2 Hz, 2H), 7.25-7.23 (m, 2H), 2.42 (s, 3H). Mass calculated  $[M+H]^+$ : 221.0966, HRMS  $[M+H]^+$ : 221.0966.

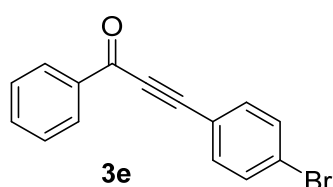

**3-(4-bromophenyl)-1-phenylprop-2-yn-1-one (3e)**<sup>42</sup>

Isolated as a yellow oil (231 mg, 0.81 mmol, 67%). <sup>1</sup>H NMR (400 MHz, CDCl<sub>3</sub>):  $\delta$  8.25 (dd,  $J$  = 4.8, 1.6 Hz, 2H), 7.72-7.65 (m, 3H), 7.56-7.44 (m, 4H). Mass calculated  $[M+H]^+$ : 284.9915, HRMS  $[M+H]^+$ : 284.9913.

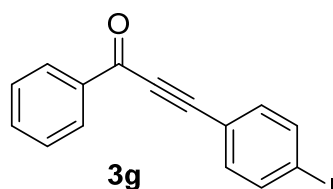

**3-(4-iodophenyl)-1-phenylprop-2-yn-1-one (3g)**

Isolated as a cream solid (172 mg, 0.52 mmol, 67%). <sup>1</sup>H NMR (400 MHz, CDCl<sub>3</sub>):  $\delta$  8.20 (dt,  $J$  = 8.4, 1.4 Hz, 2H), 7.78 (dt,  $J$  = 8.5, 1.9 Hz, 2H), 7.64 (tt,  $J$  = 7.4, 1.9 Hz, 1H), 7.53 (tt,  $J$  = 8.0, 1.6 Hz, 2H), 7.39 (dt,  $J$  = 8.5, 2.0 Hz, 2H). <sup>13</sup>C NMR (100 MHz, CDCl<sub>3</sub>):  $\delta$  177.9, 138.1, 136.8, 134.4, 134.4, 134.3, 134.3, 129.7, 128.8, 119.7, 97.8, 88.0. IR:  $\nu$  3413, 1264, 3207, 3056, 2926, 2653, 2204, 1631, 1575, 1471, 1386, 1319, 1286,

1209, 1170, 1007, 816, 695  $\text{cm}^{-1}$ . Mass calculated  $[\text{M}+\text{H}]^+$ : 332.9776, HRMS  $[\text{M}+\text{H}]^+$ : 332.9774. MP: 118-120°C.

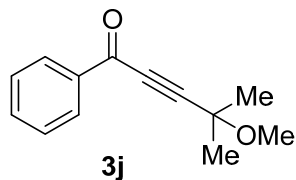

**3j**  
 $[\text{M}+\text{H}]^+$ : 203.1074.

#### 4-methoxy-4-methyl-1-phenylpent-2-yn-1-one (**3j**)<sup>39</sup>

Isolated as a clear oil (105 mg, 0.52 mmol, 43%).  $^1\text{H}$  NMR (400 MHz,  $\text{CDCl}_3$ )  $\delta$  8.16-8.09 (m, 2H), 7.66-7.60 (m, 1H), 7.53-7.47 (m, 2H), 3.47 (s, 3H), 1.60 (s, 6H). Mass calculated  $[\text{M}+\text{H}]^+$ : 203.1072, HRMS

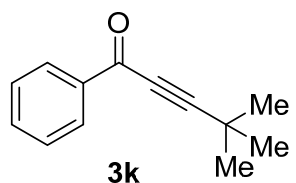

**3k**

#### 4,4-dimethyl-1-phenylpent-2-yn-1-one (**3k**)<sup>43</sup>

Isolated as a clear oil (789 mg, 4.24 mmol, 70%).  $^1\text{H}$  NMR (400 MHz,  $\text{CDCl}_3$ ):  $\delta$  8.12 (dd,  $J = 8.5, 1.4$  Hz, 2H), 7.59 (tt,  $J = 8.0, 1.3$  Hz, 1H), 7.47 (tt,  $J = 7.8, 1.6$  Hz, 2H), 1.38 (s, 9H). Mass calculated  $[\text{M}+\text{H}]^+$ : 187.1123, HRMS  $[\text{M}+\text{H}]^+$ : 187.1122.

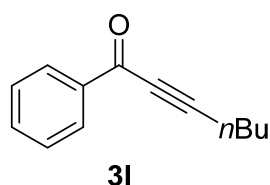

**3l**

#### 1-phenylhept-2-yn-1-one (**3l**)<sup>37</sup>

Isolated as a clear oil (811 mg, 4.36 mmol, 72%).  $^1\text{H}$  NMR (400 MHz,  $\text{CDCl}_3$ ):  $\delta$  8.15-8.12 (m, 2H), 7.69 (tt,  $J = 7.4, 1.2$  Hz, 1H), 7.47 (tt,  $J = 7.2, 1.6$  Hz, 2H), 2.50 (t,  $J = 7.0$  Hz, 2H), 1.70-1.62 (m, 2H), 1.55-1.46 (m, 2H), 0.96 (t,  $J = 7.2$  Hz, 3H). Mass calculated  $[\text{M}+\text{H}]^+$ : 187.1123, HRMS  $[\text{M}+\text{H}]^+$ : 187.1123.

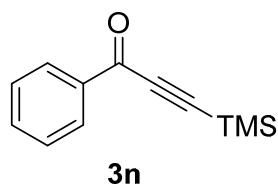

**3n**

#### 1-phenyl-3-(trimethylsilyl)prop-2-yn-1-one (**3n**)<sup>44</sup>

Isolated as a clear oil (81 mg, 0.40 mmol, 70%).  $^1\text{H}$  NMR (400 MHz,  $\text{CDCl}_3$ ):  $\delta$  8.16-8.14 (m, 2H), 7.61 (tt,  $J = 5.6, 2.0$  Hz, 1H), 7.49 (tt,  $J = 6.8, 1.6$  Hz, 2H), 0.30 (s, 9H). Mass calculated  $[\text{M}+\text{H}]^+$ : 203.0892, HRMS  $[\text{M}+\text{H}]^+$ : 203.0893.

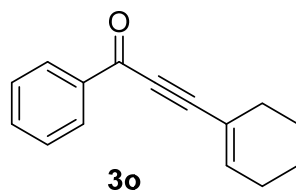

**3o**

#### 3-(cyclohex-1-en-1-yl)-1-phenylprop-2-yn-1-one (**3o**)<sup>37</sup>

Isolated as an orange oil (726 mg, 3.45 mmol, 57%).  $^1\text{H}$  NMR (400 MHz,  $\text{CDCl}_3$ ):  $\delta$  8.15-8.13 (m, 2H), 7.59 (tt,  $J = 6.8, 1.4$  Hz, 1H), 7.47 (tt,  $J = 7.6, 1.8$  Hz, 2H), 6.58 (sept,  $J = 2.0$  Hz, 1H), 2.30-2.18 (m, 4H), 1.74-1.61 (m, 4H). Mass calculated  $[\text{M}+\text{H}]^+$ : 210.1045, HRMS  $[\text{M}+\text{H}]^+$ : 210.1046.

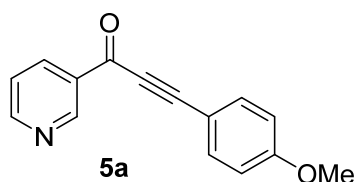

**5a**

#### 3-(4-methoxyphenyl)-1-(pyridin-3-yl)prop-2-yn-1-one (**5a**)

Isolated as a pale yellow solid (242 mg, 1.02 mmol, 68%).  $^1\text{H}$  NMR (400 MHz,  $\text{CDCl}_3$ ):  $\delta$  9.41 (d,  $J = 1.6$  Hz, 1H), 8.81 (dd,  $J = 4.8, 1.6$  Hz, 1H), 8.41 (dt,  $J = 8.0, 2.0$  Hz, 1H), 7.63 (dt,  $J = 9.2, 2.0$  Hz, 2H), 7.45 (qd,  $J = 4.0, 0.8$  Hz, 1H), 6.93 (dt,  $J = 8.8, 2.0$  Hz, 2H),

3.85 (s, 3H).  $^{13}\text{C}$  NMR (100 MHz,  $\text{CDCl}_3$ ):  $\delta$  176.4, 162.2, 151.4, 136.2, 135.5, 132.4, 123.6, 114.6, 111.3, 96.2, 86.5, 55.5. IR:  $\nu$  3349, 2930, 2845, 2179, 1694, 1636, 1601, 1512, 1404  $\text{cm}^{-1}$ . Mass calculated  $[\text{M}+\text{H}]^+$ : 238.0863, HRMS  $[\text{M}+\text{H}]^+$ : 238.0857. MP: 87-91 $^\circ\text{C}$ .

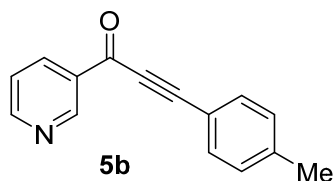

### 1-(pyridin-3-yl)-3-(p-tolyl)prop-2-yn-1-one (5b)

Isolated as a white solid (159 mg, 0.72 mmol, 48 %).  $^1\text{H}$  NMR (400 MHz,  $\text{CDCl}_3$ ):  $\delta$  9.45 (s, 1H), 8.84 (dd,  $J = 4.8, 1.2$  Hz, 1H), 8.44 (dt,  $J = 8.0, 2.0$  Hz, 1H), 7.60 (dt,  $J = 8.4, 2.0$  Hz, 2H), 7.47 (qd,  $J = 4.0, 0.8$  Hz, 1H), 7.25 (d,  $J = 8.0$  Hz, 2H), 2.43 (s, 3H).  $^{13}\text{C}$  NMR (100 MHz,  $\text{CDCl}_3$ ):  $\delta$  176.5, 154.2, 151.5, 142.2, 136.3, 133.4, 132.3, 129.7, 123.6, 116.5, 95.6, 86.3, 21.9. IR:  $\nu$  3415, 3256, 3190, 3035, 2915, 2849, 2446, 2202, 1636, 1578, 1504, 1404, 1299  $\text{cm}^{-1}$ . Mass calculated  $[\text{M}+\text{H}]^+$ : 222.0913, HRMS  $[\text{M}+\text{H}]^+$ : 222.0910. MP: 113-115  $^\circ\text{C}$ .

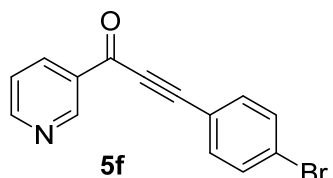

### 3-(4-bromophenyl)-1-(pyridin-3-yl)prop-2-yn-1-one (5f)

Isolated as a light brown solid (110 mg, 0.39 mmol, 50%).  $^1\text{H}$  NMR (400 MHz,  $\text{CDCl}_3$ ):  $\delta$  9.42 (dd,  $J = 2.2, 1.0$  Hz, 1H), 8.85 (dd,  $J = 4.8, 1.6$  Hz, 1H), 8.41 (dt,  $J = 8.0, 2.0$  Hz, 1H), 7.61-7.55 (m, 4H), 7.48 (qd,  $J = 4.0, 0.8$  Hz, 1H).  $^{13}\text{C}$  NMR (100 MHz,  $\text{CDCl}_3$ ):  $\delta$  176.4, 154.5, 151.6, 136.3, 134.6, 132.4, 132.2, 126.3, 123.8, 118.6, 93.4, 87.2. IR:  $\nu$  3526, 3084, 3051, 2918, 2843, 2201, 1902, 1635, 1577, 1491  $\text{cm}^{-1}$ . Mass calculated  $[\text{M}]^+$ : 287.9847, HRMS  $[\text{M}]^+$ : 287.9855. MP: 125-128  $^\circ\text{C}$ .

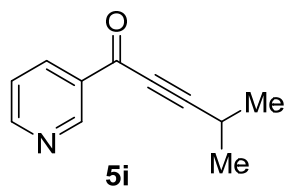

### 4-methyl-1-(pyridin-3-yl)pent-2-yn-1-one (5i)

Isolated as a light brown oil (96 mg, 0.56 mmol, 37%).  $^1\text{H}$  NMR (400 MHz,  $\text{CDCl}_3$ ):  $\delta$  9.34 (d,  $J = 1.6$  Hz, 1H), 8.81 (dd,  $J = 4.6, 1.4$  Hz, 1H), 8.35 (dt,  $J = 7.6, 2.0$  Hz, 1H), 7.44 (qd,  $J = 3.8, 0.6$  Hz, 1H), 2.89 (sep,  $J = 7.0$  Hz, 1H), 1.34 (d,  $J = 6.4$  Hz, 6H).  $^{13}\text{C}$  NMR (100 MHz,  $\text{CDCl}_3$ ):  $\delta$  176.8, 154.1, 151.6, 136.4, 132.4, 123.6, 103.4, 78.4, 22.1, 21.2. IR:  $\nu$  2973, 2923, 2868, 2210, 2167, 1656, 1578, 1415, 1318, 1260  $\text{cm}^{-1}$ . Mass calculated  $[\text{M}+\text{H}]^+$ : 174.0913, HRMS  $[\text{M}+\text{H}]^+$ : 174.0911.

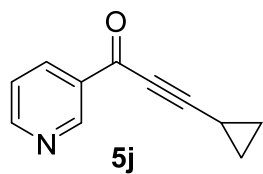

### 3-cyclopropyl-1-(pyridin-3-yl)prop-2-yn-1-one (5j)

Isolated as an orange oil (103 mg, 0.60 mmol, 40%).  $^1\text{H}$  NMR (400 MHz,  $\text{CDCl}_3$ ):  $\delta$  9.25 (d,  $J = 1.6$  Hz, 1H), 8.75 (dd,  $J = 4.8, 1.6$  Hz, 1H), 8.28 (dt,  $J = 8.0, 2.0$  Hz, 1H), 7.38 (qd,  $J = 4.0, 0.8$  Hz, 1H), 1.56-1.49 (m, 1H), 1.08-1.00 (m, 4H).  $^{13}\text{C}$  NMR (100 MHz,  $\text{CDCl}_3$ ):  $\delta$  176.4, 154.1, 151.5, 144.7, 136.2, 123.5, 107.8, 83.4, 10.3, 0.2. IR:  $\nu$  2907, 2845, 2202, 1632, 1586, 1419, 1361, 1276, 1194  $\text{cm}^{-1}$ . Mass calculated  $[\text{M}+\text{H}]^+$ : 172.0762, HRMS  $[\text{M}+\text{H}]^+$ : 172.0759.

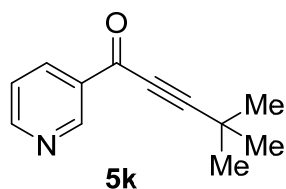

### 4,4-dimethyl-1-(pyridin-3-yl)pent-2-yn-1-one (5k)

Isolated as a light brown solid (177 mg, 0.95 mmol, 63%).  $^1\text{H}$  NMR (400 MHz,  $\text{CDCl}_3$ ):  $\delta$  9.31 (dd,  $J = 2.2, 0.8$  Hz, 1H), 8.79 (dd,  $J = 4.8, 1.8$  Hz, 1H), 8.35-8.32 (m, 1H), 7.42 (qd,  $J = 4.0, 0.9$  Hz, 1H), 1.38 (s, 9H).  $^{13}\text{C}$  NMR (100 MHz,  $\text{CDCl}_3$ ):  $\delta$  176.7, 153.8, 151.3, 136.5, 132.5, 123.7, 106.0, 77.7, 30.2, 28.3. IR:  $\nu$  3442, 3275, 3039, 2965, 2930, 2899, 2876, 2206, 1644, 1582, 1470, 1454, 1408  $\text{cm}^{-1}$ . Mass calculated  $[\text{M}+\text{H}]^+$ : 188.1070, HRMS  $[\text{M}+\text{H}]^+$ : 188.1072. MP: 54-57°C.

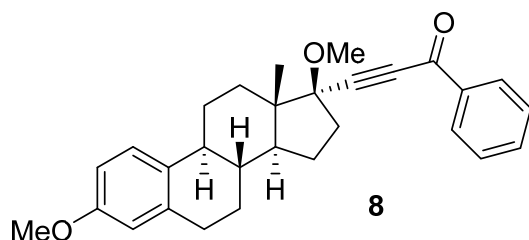

**3-((8R,9S,13S,14S,17S)-3,17-dimethoxy-13-methyl-7,8,9,11,12,13,14,15,16,17-decahydro-6H-cyclopenta[a]phenanthren-17-yl)-1-phenylprop-2-yn-1-one (8)**

Isolated as a clear, amorphous solid (503 mg, 1.18 mmol, 74%).  $^1\text{H}$  NMR (400 MHz,  $\text{CDCl}_3$ ):  $\delta$  8.19 (d,  $J = 7.2$  Hz, 2H), 7.66-7.62 (m, 1H), 7.54- 7.50 (m, 2H), 7.22 (d,  $J = 8.4$  Hz, 1H), 6.74-6.72 (m, 1H), 6.66 (s, 1H), 3.80 (s, 3H), 3.55 (s, 3H), 2.92-2.88 (m, 2H), 2.48-2.36 (m, 2H), 2.32-2.27 (m, 1H), 2.17-1.86 (m, 6H), 1.60-1.41 (m, 4H), 0.98 (s, 3H).  $^{13}\text{C}$  NMR (100 MHz,  $\text{CDCl}_3$ ):  $\delta$  177.7, 157.6, 137.9, 137.0, 134.2, 132.4, 129.6, 128.8, 126.5, 113.9, 111.6, 95.8, 86.4, 86.3, 55.3, 54.1, 50.3, 48.6, 43.6, 39.3, 36.4, 34.6, 29.9, 27.4, 26.6, 23.0, 12.9. IR:  $\nu$  3273, 3054, 2931, 2873, 2823, 2207, 1641, 1613, 1591, 1576, 1432  $\text{cm}^{-1}$ . Mass calculated  $[\text{M}+\text{Na}]^+$ : 451.2244, HRMS  $[\text{M}+\text{Na}]^+$ : 451.2241.

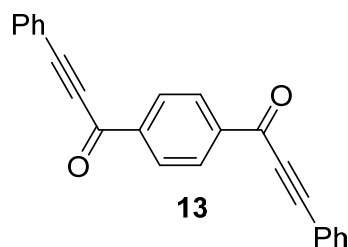

**1,1'-(1,4-phenylene)bis(3-phenylprop-2-yn-1-one) (13)<sup>15</sup>**

Isolated as a white solid (273 mg, 0.82 mmol, 49%).  $^1\text{H}$  NMR (400 MHz,  $\text{CDCl}_3$ ):  $\delta$  8.36 (s, 4H), 7.72 (dt,  $J = 5.2, 1.6$  Hz, 4H), 7.55-7.51 (m, 2H), 7.45 (td,  $J = 6.0, 1.6$  Hz, 4H). Mass calculated  $[\text{M}^+]$ : 334.0994, HRMS  $[\text{M}^+]$ : 334.0991.

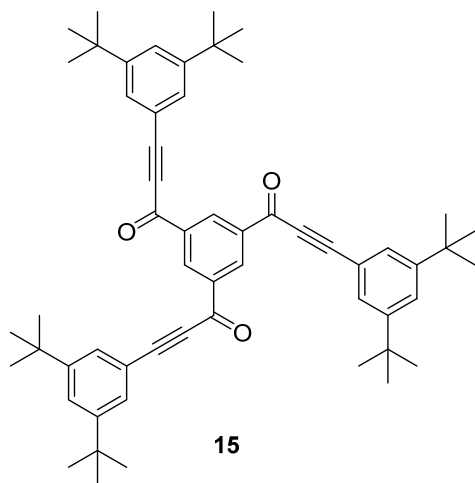

**1,1',1''-(benzene-1,3,5-triyl)tris(3-(3,5-di-tert-butylphenyl)prop-2-yn-1-one) (15)**

Isolated as a light brown foam (86 mg, 0.11 mmol, 26%).  $^1\text{H}$  NMR (400 MHz,  $\text{CDCl}_3$ ):  $\delta$  9.35 (s, 3H), 7.58 (d,  $J = 1.84$  Hz, 6H), 7.55 (q,  $J = 1.8$  Hz, 3H), 1.28 (s, 54H).  $^{13}\text{C}$  NMR (100 MHz,  $\text{CDCl}_3$ ):  $\delta$  176.1, 151.5, 138.1, 134.6, 127.9, 126.3, 118.4, 97.4, 85.9, 34.6, 31.1. IR:  $\nu$  2961, 2903, 2849, 2194, 1648, 1582, 1462, 1423, 1361  $\text{cm}^{-1}$ . Mass calculated  $[\text{M}^+]$ : 798.5012, HRMS  $[\text{M}^+]$ : 798.5004.



### General Procedure B:

#### Preparation of 1-(4-fluorophenyl)-3-phenylprop-2-yn-1-one (**1e**)<sup>2,6,7</sup>

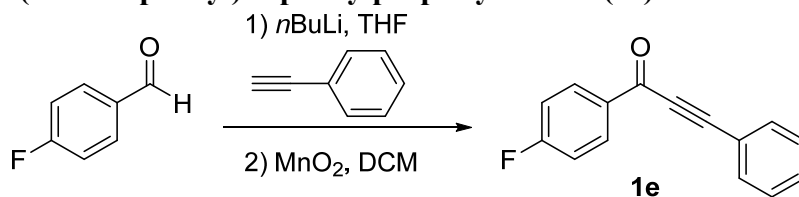

To a stirring solution of phenylacetylene (118 mg, 1.16 mmol) in THF (6 mL) at -78 °C was added *n*-BuLi (2.5 M, 0.46 mL). The reaction was stirred 15 min at 0 °C and added to a solution of aldehyde (137 mg, 1.10 mmol) in THF (10 mL) at -78 °C. The reaction was warmed to r.t. and stirred for 3 hours. The reaction was quenched with H<sub>2</sub>O and extracted with Et<sub>2</sub>O. The combined organic layers were washed with NaHCO<sub>3</sub>, H<sub>2</sub>O, brine, dried over Na<sub>2</sub>SO<sub>4</sub> and concentrated under reduced pressure. Without purification, the crude material was redissolved in dichloromethane and manganese dioxide (1.44 g, 16.57 mmol) was added at room temperature. The reaction mixture was stirred for 1 hour and then filtered through celite and concentrated under reduced pressure. The crude material was purified via silica gel column chromatography (10:1 → 3:1 hexanes:EtOAc) to give a white solid in 68% yield (168 mg).

The following compounds were prepared using General Procedure B. **1e-1j**, **1l**, **1o-1p**, and **1r-1s** are known compounds from literature.

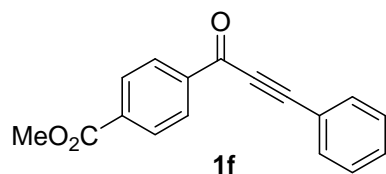

HRMS [ $M^+$ ]: 265.0864.

#### Methyl 4-(3-phenylprop-2-yn-1-yl)benzoate (**1f**)<sup>8</sup>

Isolated as a white solid (234 mg, 0.88 mmol, 74%). <sup>1</sup>H NMR (400 MHz, CDCl<sub>3</sub>): δ 8.27 (dd, *J* = 8.4, 2.0 Hz, 2H), 8.18 (dd, *J* = 6.8, 2.0 Hz, 2H), 7.71 (dt, *J* = 6.8, 1.2 Hz, 2H), 7.51 (m, 1H), 7.45 (m, 2H), 3.97 (s, 3H). Mass calculated [ $M^+$ ]: 265.0865,

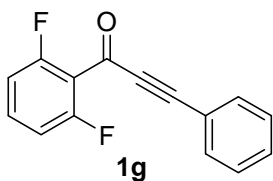

#### 1-(2,6-difluorophenyl)-3-phenylprop-2-yn-1-one (**1g**)<sup>9</sup>

Isolated as a light yellow solid (202 mg, 0.84 mmol, 60%). <sup>1</sup>H NMR (400 MHz, CDCl<sub>3</sub>): δ 7.63 (dt, *J* = 7.2, 1.6 Hz, 2H), 7.51-7.46 (m, 2H), 7.44-7.38 (m, 2H), 7.00 (tt, *J* = 8.4, 2.0 Hz, 2H). Mass calculated [ $M+H$ ]<sup>+</sup>: 243.0621, HRMS [ $M+H$ ]<sup>+</sup>: 243.0621.

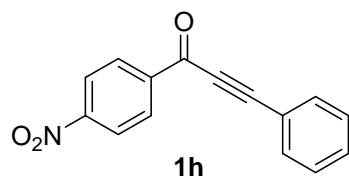

#### 1-(4-nitrophenyl)-3-phenylprop-2-yn-1-one (**1h**)<sup>10</sup>

Isolated as a bright yellow solid (482 mg, 1.92 mmol, 64%). <sup>1</sup>H NMR (400 MHz, CDCl<sub>3</sub>): δ 8.88 (dd, *J* = 4.8, 1.5 Hz, 2H), 8.00 (dd, *J* = 4.4, 1.7 Hz, 2H), 7.73-7.70 (m, 2H), 7.56-7.44 (m, 3H). Mass calculated [ $M+H$ ]<sup>+</sup>: 252.0661, HRMS [ $M+H$ ]<sup>+</sup>: 252.0663.

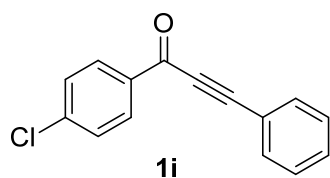

**1-(4-chlorophenyl)-3-phenylprop-2-yn-1-one (1i)<sup>4</sup>**

Isolated as a white solid (254 mg, 1.05 mmol, 53%). <sup>1</sup>H NMR (400 MHz, CDCl<sub>3</sub>): δ 8.16 (dt, *J* = 8.8, 1.8 Hz, 2H), 7.70-7.68 (m, 2H), 7.52-7.48 (m, 3H), 7.46-7.42 (m, 2H). Mass calculated [M+H]<sup>+</sup>: 241.0420, HRMS [M+H]<sup>+</sup>: 241.0419.

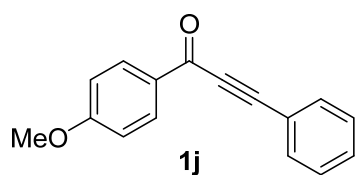

**1-(4-methoxyphenyl)-3-phenylprop-2-yn-1-one (1j)<sup>2</sup>**

Isolated as a white solid (497 mg, 2.10 mmol, 65%). <sup>1</sup>H NMR (400 MHz, CDCl<sub>3</sub>): δ 8.21-8.18 (m, 2H), 7.69-7.66 (m, 2H), 7.50-7.39 (m, 3H), 6.99 (dt, *J* = 9.1, 2.6 Hz, 2H), 3.91 (s, 3H). Mass calculated [M+H]<sup>+</sup>: 237.0916, HRMS [M+H]<sup>+</sup>: 237.0911.

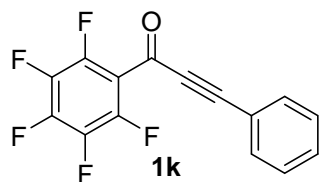

**1-(perfluorophenyl)-3-phenylprop-2-yn-1-one (1k)**

Isolated as a pale yellow solid (617 mg, 2.08 mmol, 94%). <sup>1</sup>H NMR (400 MHz, CDCl<sub>3</sub>): δ 7.65-7.63 (m, 2H), 7.52-7.50 (m, 1H), 7.45-7.40 (m, 2H). <sup>13</sup>C NMR (100 MHz): δ 167.8, 146.7 (m), 144.9 (m), 144.2 (m), 142.3 (m), 133.5, 131.7, 128.8, 119.1, 95.3 (t, *J* = 2.2 Hz), 88.7. <sup>19</sup>F NMR (377 MHz): δ -140.1 (m), -147.1 (m), -160.1 (m). IR: ν 2938, 2206, 2159, 1656, 1520, 1481 cm<sup>-1</sup>. Mass calculated (M+H): 297.0339, HRMS (M+H): 297.0337. MP: 71-74°C.

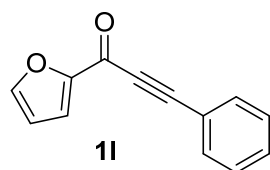

**1-(furan-2-yl)-3-phenylprop-2-yn-1-one (1l)<sup>11</sup>**

Isolated as a white solid (1.32 g, 6.74 mmol, 70%). <sup>1</sup>H NMR (400 MHz, CDCl<sub>3</sub>): δ 7.69 (t, *J* = 0.6 Hz, 1H), 7.64 (dt, *J* = 6.4, 1.6 Hz, 2H), 7.48 (t, *J* = 7.6 Hz, 1H), 7.44-7.39 (m, 3H), 6.60 (q, *J* = 1.6 Hz, 1H). Mass calculated [M+H]<sup>+</sup>: 197.0603, HRMS [M+H]<sup>+</sup>: 197.0600.

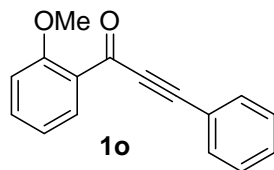

**1-(2-methoxyphenyl)-3-phenylprop-2-yn-1-one (1o)<sup>14</sup>**

Isolated as a white solid (784 mg, 3.34 mmol, 76%). <sup>1</sup>H NMR (400 MHz, CDCl<sub>3</sub>): δ 8.08 (dd, *J* = 8.0, 2.0 Hz, 1H), 7.63 (dd, *J* = 7.2, 1.2 Hz, 2H), 7.54 (td, *J* = 8.4, 2.0 Hz, 1H), 7.45-7.37 (m, 3H), 7.03 (q, *J* = 8.4 Hz, 2H), 3.96 (s, 3H). Mass calculated [M+H]<sup>+</sup>: 237.0916, HRMS [M+H]<sup>+</sup>: 237.0920.

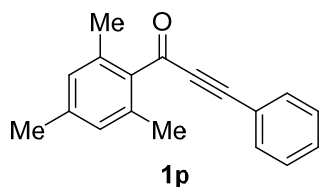

**1-mesityl-3-phenylprop-2-yn-1-one (1p)<sup>37</sup>**

Isolated as a clear oil (165 mg, 0.66 mmol, 91%). <sup>1</sup>H NMR (400 MHz, CDCl<sub>3</sub>): δ 7.57 (dt, *J* = 6.8, 1.6 Hz, 2H), 7.45 (tt, *J* = 6.4, 1.6 Hz, 1H), 7.37 (tt, *J* = 6.4, 1.6 Hz, 2H), 6.89 (s, 2H), 2.42 (s, 6H), 2.31 (s, 3H). Mass calculated [M+H]<sup>+</sup>: 249.1279, HRMS [M+H]<sup>+</sup>: 249.1278.

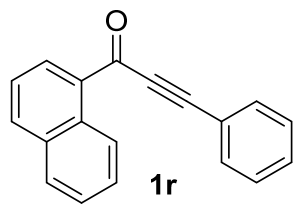

### 1-(naphthalen-1-yl)-3-phenylprop-2-yn-1-one (**1r**)<sup>4</sup>

Isolated as a white solid (532 mg, 2.07 mmol, 72%). <sup>1</sup>H NMR (400 MHz, CDCl<sub>3</sub>): δ 9.24 (d, *J* = 8.8 Hz, 1H), 8.65 (dd, *J* = 3.2, 1.2 Hz, 1H), 8.10 (d, *J* = 8.4 Hz, 1H), 7.92 (d, *J* = 8.4 Hz, 1H), 7.71-7.67 (m, 3H), 7.63- 7.57 (m, 2H), 7.51-7.41 (m, 3H). Mass calculated [M+H]<sup>+</sup>: 257.0966, HRMS [M+H]<sup>+</sup>: 257.0968.

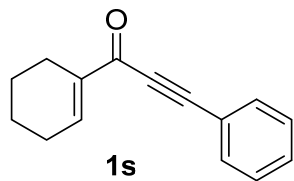

### 1-(cyclohex-1-en-1-yl)-3-phenylprop-2-yn-1-one (**1s**)<sup>4</sup>

Isolated as a clear oil (845 mg, 4.02 mmol, 68%). <sup>1</sup>H NMR (400 MHz, CDCl<sub>3</sub>): δ 7.58 (dt, *J* = 5.6, 1.6 Hz, 2H), 7.46-7.41 (m, 2H), 7.39-7.35 (m, 2H), 2.37-2.29 (m, 4H), 1.68-1.64 (m, 4H). Mass calculated [M+H]<sup>+</sup>: 211.1123, HRMS [M+H]<sup>+</sup>: 211.1120.

## General Procedure C:

### Preparation of 4-(3-oxo-3-phenylprop-1-yn-1-yl)benzotrile (**3c**)

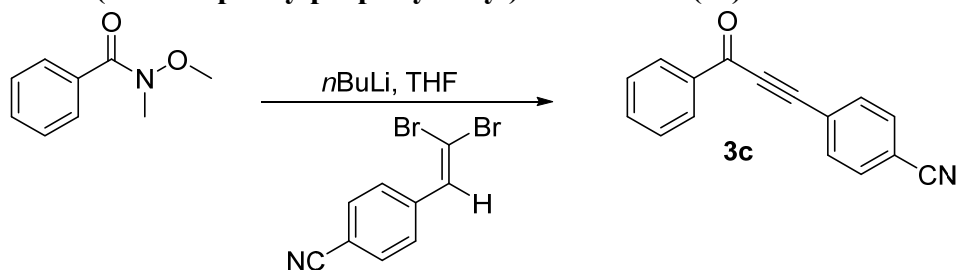

To a stirring solution of dibromoalkene (365 mg, 1.27 mmol) in THF (4 mL) at -78 °C was added *n*-BuLi (2.5 M, 1.02 mL). The reaction was stirred 15 min at -78 °C and added to a solution of Weinreb amide (200 mg, 1.21 mmol) in THF (8 mL) at -78 °C. The reaction was warmed to r.t. and stirred for 3 hours. The reaction was quenched with H<sub>2</sub>O and extracted with Et<sub>2</sub>O. The combined organic layers were washed with NaHCO<sub>3</sub>, H<sub>2</sub>O, brine, dried over Na<sub>2</sub>SO<sub>4</sub> and concentrated under reduced pressure. The crude material was purified via silica gel column chromatography (10:1 → 3:1 hexanes:EtOAc) to give a white solid in 78% yield (218 mg).

White solid. <sup>1</sup>H NMR (400 MHz, CDCl<sub>3</sub>): δ 8.20 (dt, *J* = 8.0, 1.6 Hz, 2H), 7.79-7.72 (m, 4H), 7.67 (tt, *J* = 7.2, 1.2 Hz, 1H), 7.54 (tt, *J* = 7.6, 1.6 Hz, 2H). <sup>13</sup>C NMR (100 MHz, CDCl<sub>3</sub>): δ 177.6, 136.6, 134.8, 133.4, 132.5, 129.8, 128.9, 125.1, 118.0, 114.2, 89.8, 89.5. IR: ν 3095, 3067, 2967, 2924, 2853, 2235, 2204, 1653, 1634, 1597, 1580, 1448, 1319, 1294, 1209, 1170, 698 cm<sup>-1</sup>. Mass calculated [M+H]<sup>+</sup>: 232.0762, HRMS [M+H]<sup>+</sup>: 232.0755. MP: 150-153 °C.

The following compounds were prepared using General Procedure C from known Weinreb amides. **3d**, **3f**, **1q**, and **3h-3i** are known compounds from literature.

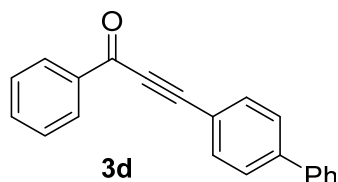

### 3-([1,1'-biphenyl]-4-yl)-1-phenylprop-2-yn-1-one (**3d**)<sup>4</sup>

Isolated as a white solid (259 mg, 0.92 mmol, 76%). <sup>1</sup>H NMR (400 MHz, CDCl<sub>3</sub>): δ 7.63-7.60 (m, 6H), 7.57-7.54 (m, 2H), 7.45 (t, *J* = 7.6 Hz, 2H), 7.38-7.34 (m, 4H). Mass calculated [M+H]<sup>+</sup>: 283.1123, HRMS [M+H]<sup>+</sup>: 283.1112.

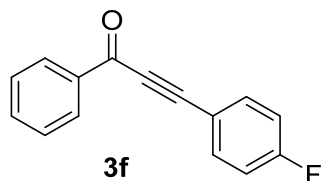

**3-(4-fluorophenyl)-1-phenylprop-2-yn-1-one (3f)**<sup>43</sup>

Isolated as a white solid (95 mg, 0.42 mmol, 35%). <sup>1</sup>H NMR (400 MHz, CDCl<sub>3</sub>): δ 8.21 (m, 2H), 7.68 (m, 3H), 7.53 (m, 2H), 7.11 (m, 2H). Mass calculated [M+H]<sup>+</sup>: 225.0716, HRMS [M+H]<sup>+</sup>: 225.0712.

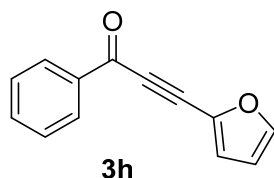

**3-(furan-2-yl)-1-phenylprop-2-yn-1-one (3h)**<sup>38</sup>

Isolated as a white solid (55 mg, 0.28 mmol, 31%). <sup>1</sup>H NMR (400 MHz, CDCl<sub>3</sub>) δ 8.19 (dt, *J* = 7.2, 1.6 Hz, 2H), 7.64 (tt, *J* = 7.6, 1.6 Hz, 1H), 7.58 (dd, *J* = 2.0, 0.8 Hz, 1H), 7.52 (td, *J* = 6.0, 1.6 Hz, 2H), 7.05 (d, *J* = 3.2 Hz, 1H), 6.53 (q, *J* = 2.0 Hz, 1H). Mass calculated [M+H]<sup>+</sup>: 196.0603, HRMS [M+H]<sup>+</sup>: 197.0600.

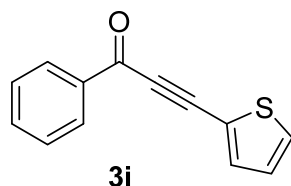

**1-phenyl-3-(thiophen-2-yl)prop-2-yn-1-one (3i)**<sup>37</sup>

Isolated as a white solid (66 mg, 0.31 mmol, 26%). <sup>1</sup>H NMR (400 MHz, CDCl<sub>3</sub>): δ 8.19 (dt, *J* = 5.2, 1.6 Hz, 2H), 7.64 (tt, *J* = 7.6, 1.6 Hz, 1H), 7.58 (dd, *J* = 2.0, 0.8 Hz, 1H), 7.52 (td, *J* = 6.0, 1.6 Hz, 2H), 7.05 (d, *J* = 3.6 Hz, 1H), 6.53 (q, *J* = 2.0 Hz, 1H). Mass calculated [M+H]<sup>+</sup>: 213.0374, HRMS [M+H]<sup>+</sup>: 213.0370.

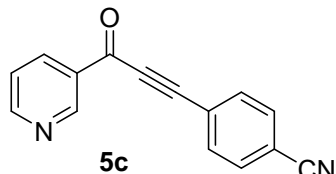

**4-(3-oxo-3-(pyridin-3-yl)prop-1-yn-1-yl)benzotrile (5c)**

Isolated as a white solid (97 mg, 0.42 mmol, 42%). <sup>1</sup>H NMR (400 MHz, CDCl<sub>3</sub>): δ 9.45 (s, 1H), 8.87 (d, *J* = 3.6 Hz, 1H), 8.47 (dt, *J* = 8.0, 1.6 Hz, 1H), 8.01 (dt, *J* = 8.4, 2.0 Hz, 2H), 7.79 (dt, *J* = 8.8, 2.0 Hz, 2H), 7.53 (q, *J* = 3.2 Hz, 1H). <sup>13</sup>C NMR (100 MHz, CDCl<sub>3</sub>): δ 176.1, 154.8, 151.6, 136.3, 133.6, 132.5, 124.5, 123.9, 117.9, 14.7, 91.2, 88.6. IR: ν 2963, 2926, 2862, 2197, 1679, 1639, 1569, 1302, 1209, 1094, 723 cm<sup>-1</sup>. Mass calculated [M+H]<sup>+</sup>: 233.0715, HRMS [M+H]<sup>+</sup>: 233.0717. MP: 132-135°C.

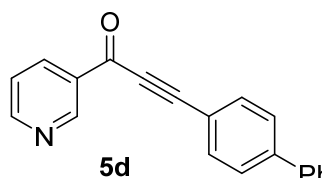

**3-([1,1'-biphenyl]-4-yl)-1-(pyridin-3-yl)prop-2-yn-1-one (5d)**

Isolated as a white solid (160 mg, 0.57 mmol, 47%). <sup>1</sup>H NMR (400 MHz, CDCl<sub>3</sub>): δ 9.47 (d, *J* = 1.6 Hz, 1H), 8.86 (dd, *J* = 5.2, 1.8 Hz, 1H), 8.46 (dt, *J* = 8.0, 2.0 Hz, 1H), 7.77 (dt, *J* = 8.4, 1.8 Hz, 2H), 7.68 (dt, *J* = 8.0, 2.0 Hz, 2H), 7.62 (dt, *J* = 8.0, 1.6 Hz, 2H), 7.51-7.46 (m, 3H), 7.41 (tt, *J* = 7.2, 1.4 Hz, 1H). <sup>13</sup>C NMR (100 MHz, CDCl<sub>3</sub>): δ 176.4, 154.3, 151.5, 144.2, 139.7, 136.3, 133.9, 132.3, 129.1, 128.4, 127.5, 127.2, 123.7, 118.3, 94.9, 87.1. IR: ν 3039, 2927, 2845, 2186, 1652, 1601, 1590, 1477, 1408, 1326, 1307, 1210 cm<sup>-1</sup>. Mass calculated [M]<sup>+</sup>: 283.0997, HRMS [M]<sup>+</sup>: 283.0997. MP: 118-120°C.

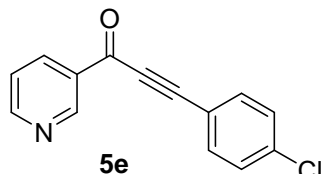

**5e**

**3-(4-chlorophenyl)-1-(pyridin-3-yl)prop-2-yn-1-one (5e)**

Isolated as a light yellow solid (62 mg, 0.26 mmol, 17%). <sup>1</sup>H NMR (400 MHz, CDCl<sub>3</sub>): δ 9.42 (dd, *J* = 2.4, 0.8 Hz, 1H), 8.85 (dd, *J* = 4.8, 1.8 Hz, 1H), 8.42 (dt, *J* = 8.4, 2.0 Hz, 1H), 7.63 (dt, *J* = 8.8, 2.2 Hz, 2H), 7.49 (qd, *J* = 4.2, 0.8 Hz, 1H), 7.43 (dt, *J* = 6.4, 2.0 Hz, 2H). <sup>13</sup>C NMR (100 MHz, CDCl<sub>3</sub>): δ 176.3, 154.4, 151.5, 137.9, 136.4, 134.6, 132.3, 129.5, 123.8, 118.1, 110.2, 93.4, 87.1. IR: ν 3361, 2210, 1636, 1582, 1485, 1423, 1404, 1303 cm<sup>-1</sup>. Mass calculated [M+H]<sup>+</sup>: 242.0367, HRMS [M+H]<sup>+</sup>: 242.0364. MP: 114-116°C.

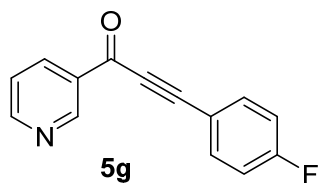

**5g**

**3-(4-fluorophenyl)-1-(pyridin-3-yl)prop-2-yn-1-one (5g)**

Isolated as a light yellow solid (115 mg, 0.51 mmol, 34%). <sup>1</sup>H NMR (400 MHz, CDCl<sub>3</sub>): δ 9.44 (d, *J* = 1.6 Hz, 1H), 8.85 (dd, *J* = 4.8, 1.4 Hz, 1H), 8.44 (dt, *J* = 8.0, 1.8 Hz, 1H), 7.72 (tt, *J* = 6.8, 2.6 Hz, 2H), 7.50 (qd, *J* = 3.8, 0.8 Hz, 1H), 7.15 (tt, *J* = 8.4, 2.2 Hz, 2H). <sup>13</sup>C NMR (100 MHz, CDCl<sub>3</sub>): δ 176.2, 154.1, 151.3, 136.6, 135.8, 135.8, 132.4, 123.9, 116.7, 116.5, 93.9, 86.3. <sup>19</sup>F NMR (377 MHz): δ -105.0 (m). IR: ν 3326, 2930, 2845, 2198, 1632, 1601, 1501, 1400, 1299, 1198 cm<sup>-1</sup>. Mass calculated [M]<sup>+</sup>: 225.0590, HRMS [M]<sup>+</sup>: 225.0585. MP: 114-116°C.

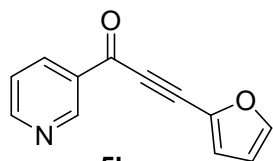

**5h**

**3-(furan-2-yl)-1-(pyridin-3-yl)prop-2-yn-1-one (5h)**

Isolated as a light brown amorphous solid (53 mg, 0.27 mmol, 29%). <sup>1</sup>H NMR (400 MHz, CDCl<sub>3</sub>): δ 9.40 (dd, *J* = 2.4, 0.8 Hz, 1H), 8.84 (dd, *J* = 4.8, 2.0 Hz, 1H), 8.41 (dq, *J* = 8.0, 1.6 Hz, 1H), 7.61 (dd, *J* = 2.0, 0.8 Hz, 1H), 7.48 (qd, *J* = 4.0, 0.8 Hz, 1H), 7.10 (dd, *J* = 3.6, 0.8 Hz, 1H), 6.55 (q, *J* = 1.8 Hz, 1H). <sup>13</sup>C NMR (100 MHz, CDCl<sub>3</sub>): δ 175.8, 154.4, 151.3, 147.3, 136.3, 134.6, 131.9, 123.7, 122.7, 112.3, 92.2, 85.0. IR: ν 2966, 2926, 2848, 2185, 1746, 1698, 1656, 1558, 1294, 1235, 1088 cm<sup>-1</sup>. Mass calculated [M+H]<sup>+</sup>: 198.0555, HRMS [M+H]<sup>+</sup>: 198.0551.

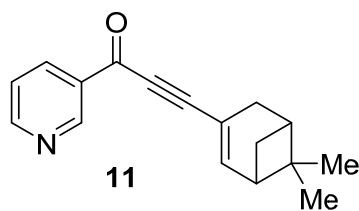

**11**

**3-(6,6-dimethylbicyclo[3.1.1]hept-2-en-3-yl)-1-(pyridin-3-yl)prop-2-yn-1-one (11)**

Isolated as a yellow oil (281 mg, 1.12 mmol, 60%). <sup>1</sup>H NMR (400 MHz, CDCl<sub>3</sub>): δ 9.33 (dd, *J* = 2.4, 0.8 Hz, 1H), 8.80 (dd, *J* = 5.2, 2.0 Hz, 1H), 8.35 (dt, *J* = 8.0, 2.0 Hz, 1H), 7.43 (ddd, *J* = 8.0, 4.8, 0.8 Hz, 1H), 6.58 – 6.55 (m, 1H), 2.55 – 2.41 (m, 4H), 2.20 – 2.16 (m, 1H), 1.35 (s, 3H), 1.29 (d, *J* = 8.8 Hz, 1H), 0.91 (s, 3H). <sup>13</sup>C NMR (100 MHz, CDCl<sub>3</sub>): δ 176.5, 153.9, 151.5, 141.0, 136.1, 128.2, 123.4, 95.7, 87.0, 46.4, 38.1, 31.1, 25.8, 21.1. IR: ν 2938, 2179, 1640, 1581, 1419, 1326, 1280 cm<sup>-1</sup>. Mass calculated [M+H]<sup>+</sup>: 252.1388, HRMS [M+H]<sup>+</sup>: 252.1391.

## Rh-Catalyzed Decarbonylation of Ynone Compounds: General Procedure

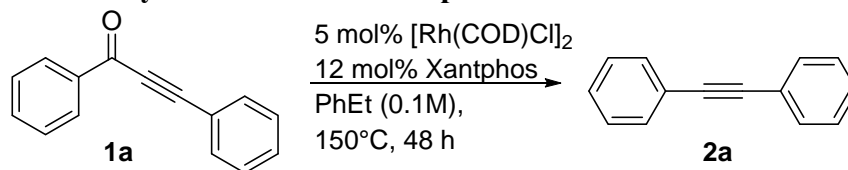

To an oven-dried test tube (18 X 150 mm) equipped with a magnetic stir bar was added monoynone (41.2 mg, 0.200 mmol), xantphos (13.9 mg, 0.024 mmol), and [Rh(COD)Cl]<sub>2</sub> (5.0 mg, 0.010 mmol). The vessel was capped with a septum and transferred into a glovebox (through standard glovebox procedure), where ethyl benzene (2.0 mL, 0.1 M) was added. The vessel was removed from the glovebox and placed under a positive flow of an inert Ar atmosphere. The reaction was heated at 90 °C for 30 min and then refluxed (150 °C) for 48 h (or until the reaction was completed by TLC). The reaction was concentrated under reduced pressure to ¼ the volume and directly loaded onto a silica gel column. The vessel was rinsed with a small portion of toluene and loaded onto the column after which the column was eluted with hexanes to obtain the desired product as a white solid in 91% yield (32.4 mg).

### 1,2-diphenylethyne (**2a**)<sup>16</sup>

<sup>1</sup>H NMR (400 MHz, CDCl<sub>3</sub>): δ 7.55-7.53 (m, 2H), 7.38-7.31 (m, 3H). <sup>13</sup>C NMR (100 MHz, CDCl<sub>3</sub>): δ 131.6, 128.3, 128.2, 123.2, 89.3. IR: ν 3062, 1601, 1489, 1439 cm<sup>-1</sup>. Mass calculated [M+H]<sup>+</sup>: 179.0861, HRMS [M+H]<sup>+</sup>: 179.0856. MP: 57-59°C.

The following compounds were prepared according to the above described procedure on a 0.2 mmol scale. **2a-2o**, **4a-4o**, **6a-6c**, **6e-6g**, **6j**, **14**, and **16** are known compounds from literature.

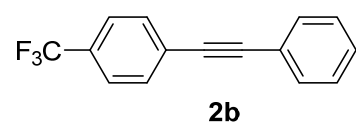

### 1-(phenylethynyl)-4-(trifluoromethyl)benzene (**2b**)<sup>17</sup>

Isolated as a white solid (25.6 mg, 0.10 mmol, 52%). IR: ν 3081, 2926, 2862, 2218, 1963, 1929, 1887, 1607, 1563, 1488, 1444 cm<sup>-1</sup>. <sup>1</sup>H NMR (400 MHz, CDCl<sub>3</sub>): δ 7.62 (q, *J* = 5.6 Hz, 4H), 7.56-7.53 (m, 2H), 7.39-7.36 (m, 3H). <sup>19</sup>F NMR (377 MHz): δ -62.8 (t, *J* = 3.0 Hz, 3F). <sup>13</sup>C NMR (100 MHz, CDCl<sub>3</sub>): δ 131.9, 131.8, 128.9, 128.6, 127.3, 125.44, 125.40, 125.3, 122.7, 110.2, 91.9, 88.1. Mass calculated [M<sup>+</sup>]: 246.0656, HRMS [M<sup>+</sup>]: 246.0659. MP: 87-88°C.

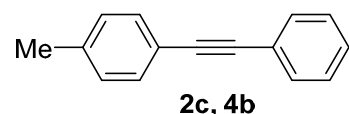

### 1-methyl-4-(phenylethynyl)benzene (**2c, 4b**)<sup>16</sup>

Isolated as a white solid (25.7 mg, 0.13 mmol, 67% (90% BRSM)), (25.3 mg, 0.13 mmol, 66% (81% BRSM)). <sup>1</sup>H NMR (400 MHz, CDCl<sub>3</sub>): δ 7.53 (dt, *J* = 6.0, 2.0 Hz, 2H), 7.43 (dd, *J* = 6.4, 2.0 Hz, 2H), 7.37-7.32 (m, 3H), 7.16 (d, *J* = 8.0 Hz, 2H), 2.38 (s, 3H). <sup>13</sup>C NMR (100 MHz, CDCl<sub>3</sub>): δ 138.5, 131.7, 131.6, 129.3, 128.5, 128.2, 123.6, 120.3. IR: ν 3431, 3090, 3045, 3023, 2931, 2843, 2215, 1943, 1913, 1879, 1596, 1513, 1449 cm<sup>-1</sup>. Mass calculated [M<sup>+</sup>]: 192.0939, HRMS [M<sup>+</sup>]: 192.0938. MP: 53-55°C.

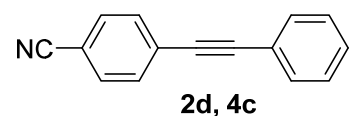

### 4-(phenylethynyl)benzonitrile (**2d, 4c**)<sup>18</sup>

Isolated as a white solid (14.6, 0.07 mmol, 36% (50% BRSM)), (28.8 mg, 0.14 mmol, 71%). <sup>1</sup>H NMR (400 MHz, CDCl<sub>3</sub>): δ 7.65-7.59 (m, 4H), 7.56-7.53 (m, 2H), 7.39-7.36 (m, 3H). <sup>13</sup>C NMR (100 MHz, CDCl<sub>3</sub>): δ 132.2, 131.9, 129.3, 128.6, 128.4, 122.3, 118.7, 113.5, 111.6, 93.9, 87.8. IR: ν 3440, 3090, 3049, 3021, 2973, 2928, 2848, 2257, 2229, 2216, 1929, 1610, 1500, 1437, 1410, 1275 cm<sup>-1</sup>. Mass calculated [M+H]<sup>+</sup>: 204.0813, HRMS [M+H]<sup>+</sup>: 204.0812. MP: 108-110°C.

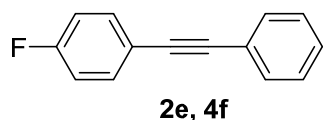

**1-fluoro-4-(phenylethynyl)benzene (2e, 4f)<sup>17</sup>**

Isolated as a white solid (26.3 mg, 0.13 mmol, 67% (87% BRSM)), (11.8, 0.06 mmol, 30% (48% BRSM)). <sup>1</sup>H NMR (400 MHz, CDCl<sub>3</sub>): δ 7.55-7.49 (m, 4H), 7.38-7.33 (m, 3H), 7.08-7.02 (m, 2H). <sup>19</sup>F NMR (377 MHz): δ -110.9(-111.1) (m, 1F). <sup>13</sup>C NMR (100 MHz, CDCl<sub>3</sub>): δ 163.9, 161.4, 133.7, 133.6, 131.7, 128.5, 128.5, 123.2, 119.5, 119.4, 115.9, 115.7, 89.2, 89.1, 88.4. IR: ν 3431, 2954, 2918, 2843, 1877, 1649, 1596, 1505, 1438 cm<sup>-1</sup>. Mass calculated [M<sup>+</sup>]: 196.0688, HRMS [M<sup>+</sup>]: 196.0688. MP: 92-94°C.

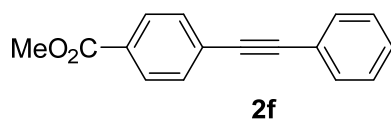

**Methyl 4-(phenylethynyl)benzoate (2f)<sup>19</sup>**

Isolated as a white solid (34.9 mg, 0.15 mmol, 74% (92% BRSM)). <sup>1</sup>H NMR (400 MHz, CDCl<sub>3</sub>): δ 8.02 (dt, *J* = 8.4, 2.0 Hz, 2H), 7.60-7.54 (m, 4H), 7.38-7.36 (m, 3H), 3.93 (s, 3H). <sup>13</sup>C NMR (100 MHz, CDCl<sub>3</sub>): δ 166.7, 131.9, 131.6, 129.64, 129.57, 128.9, 128.6, 128.1, 122.8, 92.5, 88.8, 52.4. IR: ν 3416, 3084, 3056, 3035, 3007, 2949, 2852, 2222, 1721, 1614, 1444, 1403, 1282, 1209, 1171, 1109 cm<sup>-1</sup>. Mass calculated [M+H]<sup>+</sup>: 237.0916, HRMS [M+H]<sup>+</sup>: 237.0914. MP: 125-127°C.

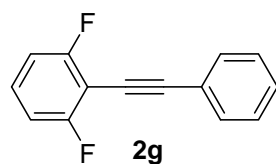

**1,3-difluoro-2-(phenylethynyl)benzene (2g)<sup>20</sup>**

Isolated as a light yellow solid (24.8 mg, 0.12 mmol, 58% (83% BRSM)). <sup>1</sup>H NMR (400 MHz, CDCl<sub>3</sub>): δ 7.63 (dt, *J* = 7.2, 1.6 Hz, 2H), 7.50-7.38 (m, 4H), 7.03-6.97 (m, 2H). <sup>13</sup>C NMR (100 MHz, CDCl<sub>3</sub>): δ 131.9, 129.8, 129.7, 129.6, 129.1, 128.5, 122.7, 111.5, 111.4, 111.3, 111.2. <sup>19</sup>F NMR (377 MHz): δ -107.5 (m, 2F). IR: ν 3440, 3077, 3035, 2925, 2845, 2229, 1655, 1635, 1579, 1555, 1493, 1472 cm<sup>-1</sup>. Mass calculated [M<sup>+</sup>]: 214.0594, HRMS [M<sup>+</sup>]: 214.0592. MP: 121-123 °C.

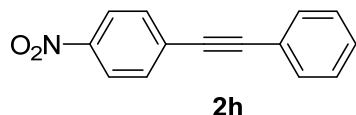

**1-nitro-4-(phenylethynyl)benzene (2h)<sup>21</sup>**

Isolated as a white solid (34.4 mg, 0.15 mmol, 77%). <sup>1</sup>H NMR (400 MHz, CDCl<sub>3</sub>): δ 8.22 (dt, *J* = 8.8, 2.0 Hz, 2H), 7.66 (dt, *J* = 8.8, 2.0 Hz, 2H), 7.58-7.55 (m, 2H), 7.42-7.38 (m, 3H). <sup>13</sup>C NMR (100 MHz, CDCl<sub>3</sub>): δ 146.9, 132.3, 131.8, 130.2, 129.3, 128.5, 123.6, 122.1, 94.7, 87.5. IR: ν 2546, 2837, 2210, 1605, 1524, 1512, 1357, 1070 cm<sup>-1</sup>. Mass calculated [M+H]<sup>+</sup>: 224.0712, HRMS [M+H]<sup>+</sup>: 224.0713. MP: 117-120°C.

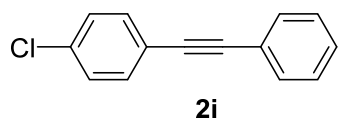

**1-chloro-4-(phenylethynyl)benzene (2i)**<sup>22</sup>

Isolated as a white solid (15.3 mg, 0.07 mmol, 36% (43% BRSM)). <sup>1</sup>H NMR (400 MHz, CDCl<sub>3</sub>): δ 7.54-7.51 (m, 2H), 7.46 (dt, *J* = 8.8, 2.0 Hz, 2H), 7.37-7.35 (m, 3H), 7.32 (dt, *J* = 8.8, 2.0 Hz, 2H). <sup>13</sup>C NMR (100 MHz, CDCl<sub>3</sub>): δ 134.2, 132.8, 131.6, 128.7, 128.5, 128.4, 122.9, 121.8, 90.3, 88.2. IR: ν 2911, 2849, 1497, 1442, 1400, 1094 cm<sup>-1</sup>. Mass calculated [M+H]<sup>+</sup>: 213.0468, HRMS [M+H]<sup>+</sup>: 213.0471. MP: 79-82°C.

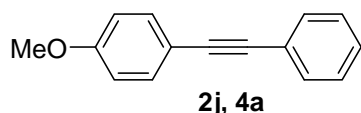

**1-methoxy-4-(phenylethynyl)benzene (2j, 4a)**<sup>23</sup>

Isolated as a white solid (15.4 mg, 0.07 mmol, 37% (77% BRSM)), (25.0 mg, 0.12 mmol, 60% (83% BRSM)). <sup>1</sup>H NMR (400 MHz, CDCl<sub>3</sub>): δ 7.53-7.46 (m, 4H), 7.36-7.31 (m, 3H), 6.88 (dd, *J* = 6.8, 2.0 Hz, 2H), 3.83 (s, 3H). <sup>13</sup>C NMR (100 MHz, CDCl<sub>3</sub>): δ 159.6, 133.0, 131.4, 128.3, 127.9, 123.6, 115.4, 114.0, 89.3, 88.0, 55.3. IR: ν 2922, 2845, 1493, 1439, 1396, 1094 cm<sup>-1</sup>. Mass calculated [M]<sup>+</sup>: 208.0888, HRMS [M]<sup>+</sup>: 208.0890. MP: 57-59°C.

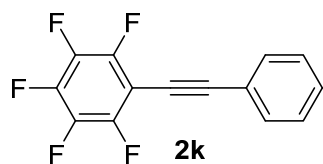

**1,2,3,4,5-pentafluoro-6-(phenylethynyl)benzene (2k)**<sup>24</sup>

Isolated as a cream solid (29.5 mg, 0.11 mmol, 55% (69% BRSM)). <sup>1</sup>H NMR (400 MHz, CDCl<sub>3</sub>): δ 7.58-7.56 (m, 2H), 7.41-7.35 (m, 3H). <sup>13</sup>C NMR (100 MHz, CDCl<sub>3</sub>): δ 148.4-148.3 (m), 146.0-145.8 (m), 142.8-142.5 (m), 140.1-140.0 (m), 138.9-138.7 (m), 136.6-136.2 (m), 131.9, 129.6, 128.5, 121.5, 101.6-101.5 (m), 100.3-100.2 (m), 73.1-73.0 (m). <sup>19</sup>F NMR (377 MHz, CDCl<sub>3</sub>): δ -136.0 (m), -152.9 (t, *J* = 20.7 Hz), -161.9-(-162.3) (m). IR: ν 3085, 3058, 2923, 2845, 2667, 2620, 2469, 2434, 2051, 1969, 1892, 1584, 1439 cm<sup>-1</sup>. Mass calculated [M+H]<sup>+</sup>: 269.0390, HRMS [M+H]<sup>+</sup>: 269.0388. MP: 94-96°C.

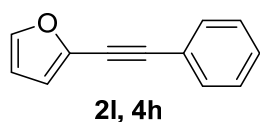

**2-(phenylethynyl)furan (2l,4h)**<sup>25</sup>

Isolated as a light red oil (14.8 mg, 0.09 mmol, 44% (68% BRSM)) (12.7 mg, 0.08 mmol, 38%). <sup>1</sup>H NMR (400 MHz, CDCl<sub>3</sub>): δ 7.55-7.50 (m, 2H), 7.43 (dd, *J* = 1.8, 0.7 Hz, 1H), 7.36-7.34 (m, 3H), 6.66 (dd, *J* = 3.4, 0.7 Hz, 1H), 6.43 (q, *J* = 1.5 Hz, 1H). <sup>13</sup>C NMR (100 MHz, CDCl<sub>3</sub>): δ 143.8, 137.3, 131.6, 128.8, 128.5, 122.4, 115.4, 111.2, 93.4, 79.5. IR: ν 2956, 2921, 2661, 2187, 1743, 1656, 1622, 1558, 1516, 1451, 1282.4, 1218, 1077 cm<sup>-1</sup>. Mass calculated [M]<sup>+</sup>: 168.0575, HRMS [M]<sup>+</sup>: 168.0575.

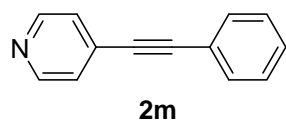

**4-(phenylethynyl)pyridine (2m)**<sup>26</sup>

Isolated as a white solid (24.4 mg, 0.14 mmol, 68%). <sup>1</sup>H NMR (400 MHz, CDCl<sub>3</sub>): δ 8.60 (dd, *J* = 4.5, 1.6, 2H), 7.60-7.51 (m, 2H), 7.44-7.31 (m, 5H). <sup>13</sup>C NMR (100 MHz, CDCl<sub>3</sub>): δ 149.7, 131.9, 131.5, 129.2, 128.5, 125.5, 122.1, 93.9, 86.6. IR: ν 2917, 2848, 1588, 1535 cm<sup>-1</sup>. Mass calculated [M+H]<sup>+</sup>: 180.0808, HRMS [M+H]<sup>+</sup>: 180.0806. MP: 89-91°C.



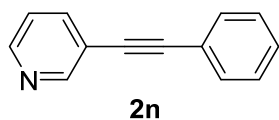

### 3-(phenylethynyl)pyridine (**2n**)<sup>19</sup>

Isolated as a white solid (32.6 mg, 0.18 mmol, 91%). <sup>1</sup>H NMR (400 MHz, CDCl<sub>3</sub>): δ 8.77 (d, *J* = 1.6 Hz, 1H), 8.55 (dd, *J* = 5.2, 1.6 Hz, 1H), 7.81 (dt, *J* = 7.6, 2.0 Hz, 1H), 7.56 – 7.54 (m, 2H), 7.39 – 7.35 (m, 3H), 7.28 (ddd, *J* = 8.0, 4.8, 0.4 Hz, 1H). <sup>13</sup>C NMR (100 MHz, CDCl<sub>3</sub>): δ 152.2, 148.5, 138.4, 131.7, 128.8, 128.4, 123.0, 122.5, 120.4, 92.6, 85.9. IR: ν 3062, 2912, 2845, 2215, 1952, 1593, 1555, 1494, 1405 cm<sup>-1</sup>. Mass calculated [M+H]<sup>+</sup>: 180.0808, HRMS [M+H]<sup>+</sup>: 180.0810. MP: 50-52°C.

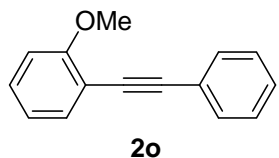

### 1-methoxy-2-(phenylethynyl)benzene (**2o**)<sup>27</sup>

Isolated as a light yellow oil (6.7 mg, 0.03 mmol, 16% (21% BRSM)). <sup>1</sup>H NMR (400 MHz, CDCl<sub>3</sub>): δ 7.56 (dd, *J* = 7.2, 1.8 Hz, 2H), 7.50 (dd, *J* = 8.0, 1.6 Hz, 1H), 7.36-7.28 (m, 4H), 6.93 (q, *J* = 8.4 Hz, 2H). <sup>13</sup>C NMR (100 MHz, CDCl<sub>3</sub>): δ 133.7, 131.8, 129.9, 128.3, 128.2, 123.7, 121.5, 120.6, 112.6, 110.8, 93.6, 85.8, 56.0. IR: ν 3064, 2957, 2929, 2851, 1662, 1594, 1496, 1459, 1437, 1277, 1246, 1105, 1027 cm<sup>-1</sup>. Mass calculated [M<sup>+</sup>]: 208.0888, HRMS [M<sup>+</sup>]: 208.0886.

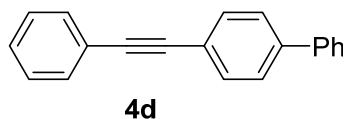

### 4-(phenylethynyl)-1,1'-biphenyl (**4d**)<sup>16</sup>

Isolated as a cream solid (37.1 mg, 0.15 mmol, 73% (86% BRSM)). <sup>1</sup>H NMR (400 MHz, CDCl<sub>3</sub>): δ 7.63-7.58 (m, 6H), 7.55 (dd, *J* = 7.9, 1.7 Hz, 2H), 7.46 (t, *J* = 7.5 Hz, 2H), 7.38-7.35 (m, 4H). <sup>13</sup>C NMR (100 MHz, CDCl<sub>3</sub>): δ 141.1, 140.5, 132.2, 131.7, 129.0, 128.5, 128.4, 127.8, 127.2, 123.4, 122.3, 90.2, 89.4. IR: ν 3464, 3080, 3059, 2966, 2931, 2845, 1666, 1451, 1403, 1171, 1067, 853, 760 cm<sup>-1</sup>. Mass calculated [M+H]<sup>+</sup>: 255.1174, HRMS [M+H]<sup>+</sup>: 255.1170. MP: 155-158°C.

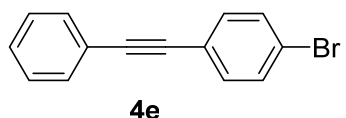

### 1-bromo-4-(phenylethynyl)benzene (**4e**)<sup>23</sup>

Isolated as a clear oil (6.2 mg, 0.02 mmol, 12% (23% BRSM)). <sup>1</sup>H NMR (400 MHz, CDCl<sub>3</sub>): δ 7.56-7.50 (m, 4H), 7.48-7.34 (m, 5H). <sup>13</sup>C NMR (100 MHz, CDCl<sub>3</sub>): δ 133.1, 132.6, 131.8, 131.7, 128.6, 128.6, 128.5, 123.0, 122.6, 122.4, 90.6, 88.4. IR: ν 2960, 2918, 2856, 1954, 1842, 1726, 1656, 1558, 1457, 1066. 790 cm<sup>-1</sup>. Mass calculated [M<sup>+</sup>]: 255.9888, HRMS [M<sup>+</sup>]: 255.9890.

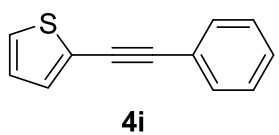

### 2-(phenylethynyl)thiophene (**4i**)<sup>47</sup>

Isolated as a cream solid (8.1 mg, 0.04 mmol, 22% (29% BRSM)). <sup>1</sup>H NMR (400 MHz, CDCl<sub>3</sub>): δ 7.53-7.51 (m, 2H), 7.37-7.34 (m, 3H), 7.30-7.28 (m, 2H), 7.01 (dd, *J* = 3.6, 1.6 Hz, 1H). <sup>13</sup>C NMR (100 MHz, CDCl<sub>3</sub>): δ 132.4, 131.9, 128.9, 128.8, 127.7, 127.6, 123.8, 123.4, 93.5, 83.1. IR: ν 3457, 3115, 3070, 3056, 2935, 2842, 2205, 1655, 1586, 1479, 1444, 1420, 1209 cm<sup>-1</sup>. Mass calculated [M<sup>+</sup>]: 184.0347, HRMS [M<sup>+</sup>]: 184.0351.

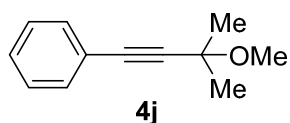

**(3-methoxy-3-methylbut-1-yn-1-yl)benzene (4j)**<sup>48</sup>

Isolated as a clear oil (7.3 mg, 0.04 mmol, 40% (41% BRSM)). <sup>1</sup>H NMR (400 MHz, CDCl<sub>3</sub>) δ 8.11 (d, *J* = 8.3 Hz, 1H), 8.05 (d, *J* = 8.2 Hz, 1H), 7.95 (d, *J* = 8.5 Hz, 1H), 7.69-7.64 (m, 2H), 7.55-7.51 (m, 1H), 7.44-7.41 (m, 1H), 7.40-7.34 (m, 3H), 7.26 (q, *J* = 7.0 Hz, 1H), 7.12 (ddd, *J* = 8.2, 6.9, 1.3 Hz, 1H), 6.80 (dd, *J* = 8.3, 0.8 Hz, 1H). <sup>13</sup>C NMR (100 MHz, CDCl<sub>3</sub>): δ 132.1, 128.7, 128.6, 123.3, 91.4, 84.5, 71.4, 52.2, 28.8. IR: ν 3471, 3087, 3056, 2994, 2935, 2835, 2236, 1949, 1600, 1493, 1462, 1441, 1386, 1361, 1285, 1168 cm<sup>-1</sup>. Mass calculated [M+H]<sup>+</sup>: 175.1123, HRMS [M+H]<sup>+</sup>: 175.1123. Product is slightly volatile.

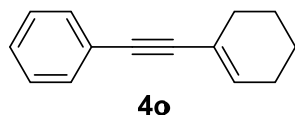

**(Cyclohex-1-en-1-ylethynyl)benzene (4o)**<sup>49</sup>

Mass calculated [M<sup>+</sup>]: 182.1096, HRMS [M<sup>+</sup>]: 182.1093. Unable to isolate from mesitylene solvent, but <sup>1</sup>H NMR and HRMS data matches literature reports.<sup>50</sup>

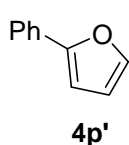

**2-phenylfuran (4p')**<sup>50</sup>

<sup>1</sup>H NMR (400 MHz, CDCl<sub>3</sub>): δ 7.68 (dt, *J* = 2.9, 1.7 Hz, 2H), 7.48 (dd, *J* = 4.4, 3.9 Hz, 1H), 7.42-7.36 (m, 2H), 7.29-7.23 (m, 1H), 6.66 (d, *J* = 3.4 Hz, 1H), 6.48 (dd, *J* = 3.4, 1.8 Hz, 1H). Unable to isolate from mesitylene solvent, but GC/MS, IR, <sup>1</sup>H NMR and <sup>13</sup>C NMR data matches literature reports.<sup>50</sup> See **Scheme S1** below.

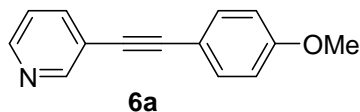

**3-((4-methoxyphenyl)ethynyl)pyridine (6a)**<sup>28</sup>

Isolated as a white solid (40.1 mg, 0.19 mmol, 96%). <sup>1</sup>H NMR (400 MHz, CDCl<sub>3</sub>): δ 8.75 (s, 1H), 8.52 (d, *J* = 3.6 Hz, 1H), 7.77 (dt, *J* = 8.0, 2.0 Hz, 1H), 7.48 (dt, *J* = 9.2, 2.6 Hz, 2H), 7.27 (qd, *J* = 3.8, 0.4 Hz, 1H), 6.89 (dt, *J* = 8.8, 2.4 Hz, 2H), 3.83 (s, 3H). <sup>13</sup>C NMR (100 MHz, CDCl<sub>3</sub>): δ 160.1, 152.1, 148.2, 138.4, 133.3, 123.2, 121.0, 114.7, 114.2, 92.9, 84.8, 55.4. IR: ν 3074, 3039, 2996, 2965, 2927, 2834, 2217, 1605, 1559, 1512, 1466, 1404 cm<sup>-1</sup>. Mass calculated [M+H]<sup>+</sup>: 210.0913, HRMS [M+H]<sup>+</sup>: 210.0911. MP: 46-47 °C.

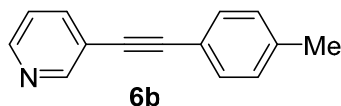

**3-(p-tolylethynyl)pyridine (6b)**<sup>29</sup>

Isolated as a white solid (36.7 mg, 0.19 mmol, 95%). <sup>1</sup>H NMR (400 MHz, CDCl<sub>3</sub>): δ 8.76 (s, 1H), 8.54 (d, *J* = 4.0 Hz, 1H), 7.79 (dt, *J* = 8.3, 1.8 Hz, 1H), 7.43 (dt, *J* = 8.0, 1.6 Hz, 2H), 7.28 (t, *J* = 3.0 Hz, 1H), 7.17 (dt, *J* = 7.8, 0.6 Hz, 2H), 2.38 (s, 3H). <sup>13</sup>C NMR (100 MHz, CDCl<sub>3</sub>): δ 152.2, 148.4, 139.2, 138.6, 131.7, 129.3, 123.2, 120.9, 119.5, 93.1, 85.4, 21.7. IR: ν 3082, 3051, 2911, 2221, 1927, 1671, 1586, 1562, 1508, 1477, 1419 cm<sup>-1</sup>. Mass calculated [M+H]<sup>+</sup>: 194.0964, HRMS [M+H]<sup>+</sup>: 194.0965. MP: 73-75 °C.

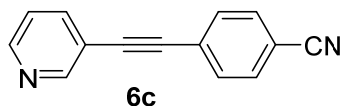

**4-(pyridin-3-ylethynyl)benzonitrile (6c)**<sup>30</sup>

Isolated as an amorphous white solid (14.7 mg, 0.07 mmol, 36% (50% BRSM)).  $^1\text{H}$  NMR (400 MHz,  $\text{CDCl}_3$ ):  $\delta$  8.80 (s, 1H), 8.61 (d,  $J = 4.8$  Hz, 1H), 7.87 (d,  $J = 8.0$  Hz, 1H), 7.69-7.62 (m, 4H), 7.36 (q,  $J = 4.0$  Hz, 1H).  $^{13}\text{C}$  NMR (100 MHz,  $\text{CDCl}_3$ ):  $\delta$  152.1, 149.0, 139.2, 132.4, 132.3, 127.4, 123.5, 119.9, 118.5, 112.4, 91.2, 89.9. IR:  $\nu$  2963, 2929, 2859, 2235, 1665, 1201, 1094, 844,  $550\text{ cm}^{-1}$ . Mass calculated  $[\text{M}+\text{H}]^+$ : 205.0766, HRMS  $[\text{M}+\text{H}]^+$ : 205.0767.

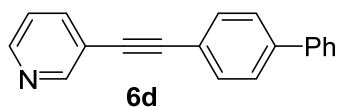

**3-((1,1'-biphenyl)-4-ylethynyl)pyridine (6d)**

Isolated as a white solid (26.0 mg, 0.10 mmol, 51%).  $^1\text{H}$  NMR (400 MHz,  $\text{CDCl}_3$ ):  $\delta$  8.80 (d,  $J = 1.2$  Hz, 1H), 8.56 (dd,  $J = 5.2, 1.6$  Hz, 1H), 7.83 (dt,  $J = 7.6, 2.0$  Hz, 1H), 7.64-7.60 (m, 6H), 7.46 (tt,  $J = 8.4, 0.8$  Hz, 2H), 7.38 (tt,  $J = 7.6, 1.6$  Hz, 1H), 7.30 (qd,  $J = 4.8, 0.8$  Hz, 1H).  $^{13}\text{C}$  NMR (100 MHz,  $\text{CDCl}_3$ ):  $\delta$  152.3, 148.6, 141.7, 140.3, 138.6, 132.3, 129.0, 127.9, 127.2, 127.1, 123.2, 121.5, 120.7, 92.8, 86.7. IR:  $\nu$  3069, 3053, 3028, 2974, 2926, 2861, 2218, 1920, 1558, 1493, 1406, 1260, 1131, 1021, 844, 807, 756, 737, 701,  $684\text{ cm}^{-1}$ . Mass calculated  $[\text{M}^+]$ : 255.1048, HRMS  $[\text{M}^+]$ : 255.1052. MP: 121-123  $^{\circ}\text{C}$ .

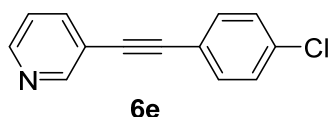

**3-((4-chlorophenyl)ethynyl)pyridine (6e)<sup>31</sup>**

Isolated as a white solid (26.1 mg, 0.12 mmol, 61%).  $^1\text{H}$  NMR (400 MHz,  $\text{CDCl}_3$ ):  $\delta$  8.75 (d,  $J = 1.5$  Hz, 1H), 8.55 (dd,  $J = 4.9, 1.6$  Hz, 1H), 7.79 (dt,  $J = 8.0, 1.7$  Hz, 1H), 7.47 (dq,  $J = 8.7, 2.0$  Hz, 2H), 7.34 (dt,  $J = 8.8, 2.1$  Hz, 2H), 7.28 (qd,  $J = 3.9, 0.8$  Hz, 1H).  $^{13}\text{C}$  NMR (100 MHz,  $\text{CDCl}_3$ ):  $\delta$  152.1, 148.7, 138.4, 134.9, 132.9, 128.8, 123.0, 120.9, 120.1, 91.5, 86.8. IR:  $\nu$  3454, 3090, 3062, 3035, 2931, 2842, 2219, 1901, 1572, 1493, 1410, 1085, 1016, 822, 812,  $704\text{ cm}^{-1}$ . Mass calculated  $[\text{M}+\text{H}]^+$ : 214.0418, HRMS  $[\text{M}+\text{H}]^+$ : 214.0420. MP: 88-91  $^{\circ}\text{C}$ .

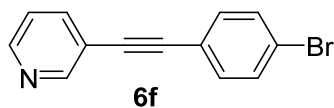

**3-((4-bromophenyl)ethynyl)pyridine (6f)<sup>32</sup>**

Isolated as a light brown solid (28.9 mg, 0.11 mmol, 56% (76% BRSM)).  $^1\text{H}$  NMR (400 MHz,  $\text{CDCl}_3$ ):  $\delta$  8.76 (s, 1H), 8.56 (dd,  $J = 4.4, 1.2$  Hz, 1H), 7.80 (dq,  $J = 8.0, 2.0$  Hz, 1H), 7.51 (dt,  $J = 8.8, 2.0$  Hz, 2H), 7.41 (dt,  $J = 8.8, 2.0$  Hz, 2H), 7.29 (qd,  $J = 4.0, 0.8$  Hz, 1H).  $^{13}\text{C}$  NMR (100 MHz,  $\text{CDCl}_3$ ):  $\delta$  152.0, 148.5, 138.4, 133.2, 131.8, 128.7, 128.5, 123.3, 121.5, 91.8, 87.2. IR:  $\nu$  3085, 3054, 3027, 2923, 2857, 2210, 1907, 1648, 1582, 1559,  $1485\text{ cm}^{-1}$ . Mass calculated  $[\text{M}+\text{H}]^+$ : 257.9918, HRMS  $[\text{M}+\text{H}]^+$ : 257.9917. MP: 68-70  $^{\circ}\text{C}$ .

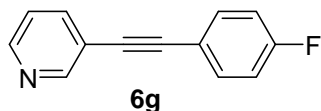

**3-((4-fluorophenyl)ethynyl)pyridine (6g)<sup>33</sup>**

Isolated as a white solid (25.6 mg, 0.13 mmol, 65%).  $^1\text{H}$  NMR (400 MHz,  $\text{CDCl}_3$ ):  $\delta$  8.76 (s, 1H), 8.55 (d,  $J = 4.0$  Hz, 1H), 7.81 (dt,  $J = 8.0, 2.0$  Hz, 1H), 7.55-7.50 (m, 2H), 7.30 (qd,  $J = 3.2, 0.8$  Hz, 1H), 7.06 (tt,  $J = 6.4, 2.0$  Hz, 2H).  $^{13}\text{C}$  NMR (100 MHz,  $\text{CDCl}_3$ ):  $\delta$  164.2, 161.7, 152.1, 148.5, 138.7, 133.8, 133.7, 123.3, 120.5, 118.7, 116.1, 115.8, 91.8, 85.7. IR:  $\nu$  3101, 3070, 3043, 2919, 2845, 2210, 1609, 1574, 1551,

1504, 1404  $\text{cm}^{-1}$ .  $^{19}\text{F}$  NMR (377 MHz):  $\delta$  -109.9 (m). Mass calculated  $[\text{M}+\text{H}]^+$ : 198.0714, HRMS  $[\text{M}+\text{H}]^+$ : 198.0710. MP: 77-78  $^{\circ}\text{C}$ .

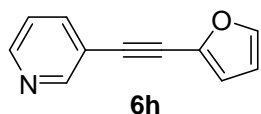

6h

### 2-(phenylethynyl)thiophene (6h)

Isolated as a clear amorphous solid (12.8 mg, 0.08 mmol, 38%).  $^1\text{H}$  NMR (400 MHz,  $\text{CDCl}_3$ ):  $\delta$  8.75 (dd,  $J = 2.0, 0.8$  Hz, 1H), 8.55 (dd,  $J = 4.8, 1.6$  Hz, 1H), 7.80 (dt,  $J = 8.0, 2.0$  Hz, 1H), 7.45 (dd,  $J = 2.0, 0.8$  Hz, 1H), 7.28 (qd,  $J = 4.8, 0.8$  Hz, 1H), 6.71 (dd,  $J = 3.2, 0.6$  Hz, 1H), 6.45 (q,  $J = 1.6$  Hz, 1H).  $^{13}\text{C}$  NMR (100 MHz,  $\text{CDCl}_3$ ):  $\delta$  151.9, 148.9, 144.3, 138.5, 136.6, 123.3, 119.8, 116.3, 111.3, 90.1, 82.9. IR:  $\nu$  3154, 3112, 3039, 2966, 2926, 2848, 2215, 1569, 1485, 1468, 1403, 1302, 1215, 1181, 1013, 937, 796, 746  $\text{cm}^{-1}$ . Mass calculated  $[\text{M}+\text{H}]^+$ : 170.0606, HRMS  $[\text{M}+\text{H}]^+$ : 170.0601.

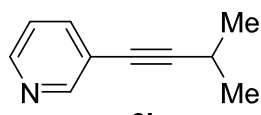

6i

### 3-(3-methylbut-1-yn-1-yl)pyridine (6i)

Isolated as a clear oil (7.6 mg, 0.05 mmol, 26%).  $^1\text{H}$  NMR (400 MHz,  $\text{CDCl}_3$ ):  $\delta$  8.60 (d,  $J = 1.2$  Hz, 1H), 8.46 (dd,  $J = 4.4, 1.6$  Hz, 1H), 7.64 (dt,  $J = 8.0, 1.8$  Hz, 1H), 7.19 (qd,  $J = 4.0, 0.6$  Hz, 1H), 2.78 (sep,  $J = 2.8$  Hz, 1H), 1.25 (d,  $J = 6.8$  Hz, 6H).  $^{13}\text{C}$  NMR (100 MHz,  $\text{CDCl}_3$ ):  $\delta$  152.4, 147.9, 138.6, 122.9, 121.2, 99.4, 76.6, 22.9, 21.3. IR:  $\nu$  3436, 3059, 2973, 2931, 2855, 1690, 1455, 1434, 1410, 1368, 1227, 1185, 749, 694  $\text{cm}^{-1}$ . Mass calculated  $[\text{M}+\text{H}]^+$ : 146.0964, HRMS  $[\text{M}+\text{H}]^+$ : 146.0965.

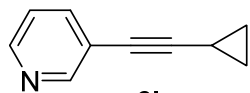

6j

### 3-(cyclopropylethynyl)pyridine (6j)<sup>34</sup>

Isolated as a clear oil (12.9 mg, 0.09 mmol, 45%).  $^1\text{H}$  NMR (400 MHz,  $\text{CDCl}_3$ ):  $\delta$  8.59 (d,  $J = 1.6$  Hz, 1H), 8.45 (dd,  $J = 5.0, 1.4$  Hz, 1H), 7.64 (dt,  $J = 8.0, 2.0$  Hz, 1H), 7.18 (qd,  $J = 4.8, 0.8$  Hz, 1H), 1.49-1.42 (m, 1H), 0.92-0.87 (m, 2H), 0.86-0.80 (m, 2H).  $^{13}\text{C}$  NMR (100 MHz,  $\text{CDCl}_3$ ):  $\delta$  152.4, 147.8, 138.7, 123.1, 121.3, 97.3, 72.6, 8.9, 0.3. IR:  $\nu$  2957, 2926, 2848, 2373, 2345, 1653, 1561, 1457, 1066, 1159  $\text{cm}^{-1}$ . Mass calculated  $[\text{M}+\text{H}]^+$ : 144.0808, HRMS  $[\text{M}+\text{H}]^+$ : 144.0805.

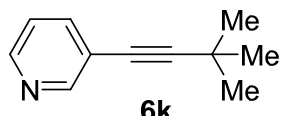

6k

### 3-(3,3-dimethylbut-1-yn-1-yl)pyridine (6k)

Isolated as a clear oil (13.1 mg, 0.08 mmol, 41% (91% BRSM)).  $^1\text{H}$  NMR (400 MHz,  $\text{CDCl}_3$ ):  $\delta$  8.59 (d,  $J = 2.0$  Hz, 1H), 8.45 (dd,  $J = 4.6, 1.4$  Hz, 1H), 7.64 (dt,  $J = 8.0, 1.8$  Hz, 1H), 7.18 (q,  $J = 4.0$  Hz, 1H), 1.31 (s, 9H).  $^{13}\text{C}$  NMR (100 MHz,  $\text{CDCl}_3$ ):  $\delta$  152.4, 147.9, 138.5, 122.9, 121.3, 102.2, 75.9, 31.0, 28.2. IR:  $\nu$  2977, 2911, 2857, 1710, 1644, 1559, 1473, 1450, 1408  $\text{cm}^{-1}$ . Mass calculated  $[\text{M}+\text{H}]^+$ : 160.1121, HRMS  $[\text{M}+\text{H}]^+$ : 160.1117.

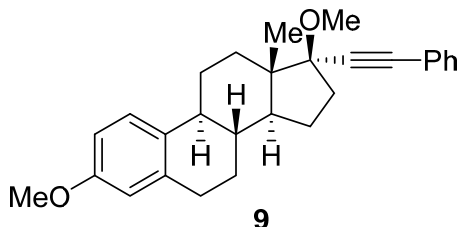

9

### (8R,9S,13S,14S,17R)-17-phenylethynyl-3,17-dimethoxy-13-methyl-7,8,9,11,12,13,14,15,16,17-decahydro-6H-cyclopenta[a]phenanthrene (9)

Isolated as a white amorphous solid (1<sup>st</sup> run: 40.9 mg, 0.10 mmol, 51%; 2<sup>nd</sup> run (0.1 mmol scale): 21.4mg, 0.06 mmol, 58%; Avg yield: 55%).  $^1\text{H}$  NMR (400 MHz,  $\text{CDCl}_3$ ):  $\delta$

7.50-7.47 (m, 2H), 7.33-7.31 (m, 3H), 7.22 (d,  $J = 8.4$  Hz, 1H), 6.73-6.71 (m, 1H), 6.64 (s, 1H), 3.78 (s, 3H), 3.49 (s, 3H), 2.89-2.85 (m, 2H), 2.37-2.34 (m, 2H), 2.28-2.23 (m, 1H), 2.14-2.06 (m, 2H), 1.92-1.82 (m, 3H), 1.58-1.35 (m, 5H), 0.94 (s, 3H).  $^{13}\text{C}$  NMR (100 MHz,  $\text{CDCl}_3$ ):  $\delta$  157.6, 138.1, 132.8, 131.9, 128.5, 128.3, 126.5, 123.4, 113.9, 111.6, 90.5, 88.0, 55.4, 53.6, 50.0, 48.1, 43.8, 39.4, 37.0, 34.6, 30.0, 27.4, 26.8, 23.0, 13.1. IR:  $\nu$  3059, 2926, 2806, 2254, 2206, 2073, 1965, 1885, 1738, 1607, 1496, 1446  $\text{cm}^{-1}$ . Mass calculated  $[\text{M}+\text{Na}]^+$ : 423.2295, HRMS  $[\text{M}+\text{Na}]^+$ : 423.2286.

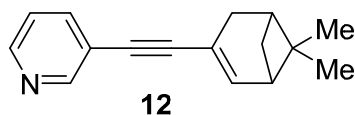

**3-((6,6-dimethylbicyclo[3.1.1]hept-2-en-3-yl)ethynyl)pyridine (12)**

Isolated as a clear oil (25.4 mg, 0.11 mmol, 57%).  $^1\text{H}$  NMR (400 MHz,  $\text{CDCl}_3$ ):  $\delta$  8.65 (s, 1H), 8.47 (d,  $J = 3.6$  Hz, 1H), 7.68 (dt,  $J = 7.6, 2.0$  Hz, 1H), 7.21 (qd,  $J = 4.0, 0.8$  Hz, 1H), 6.14-6.12 (m, 1H), 2.49-2.34 (m, 4H), 2.16-2.13 (m, 1H), 1.33 (s, 3H), 1.29 (q,  $J = 9.2$  Hz, 1H), 0.9 (s, 3H).  $^{13}\text{C}$  NMR (100 MHz,  $\text{CDCl}_3$ ):  $\delta$  152.2, 148.1, 138.3, 132.6, 129.7, 123.1, 121.1, 110.2, 93.5, 85.9, 47.1, 40.3, 38.2, 32.4, 31.6, 26.1, 21.2. IR:  $\nu$  3031, 2923, 2822, 2210, 1710, 1590, 1563, 1477, 1408  $\text{cm}^{-1}$ . Mass calculated  $[\text{M}+\text{H}]^+$ : 224.1439, HRMS  $[\text{M}+\text{H}]^+$ : 224.1441.

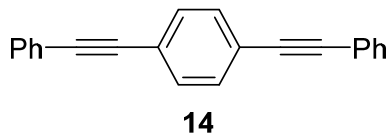

**1,4-bis(phenylethynyl)benzene (14)**<sup>33</sup>

Isolated as a white solid (13.1 mg, 0.05 mmol, 94%).  $^1\text{H}$  NMR (400 MHz,  $\text{CDCl}_3$ ):  $\delta$  7.54 (dd, 8.0, 4.4 Hz, 4H), 7.51 (s, 4H), 7.38-7.7.35 (m, 6H).  $^{13}\text{C}$  NMR (100 MHz,  $\text{CDCl}_3$ ):  $\delta$  131.8, 131.7, 128.6, 128.5, 123.2, 123.1, 91.4, 89.2. IR:  $\nu$  3084, 3053, 3025, 2963, 2929, 2853, 2199, 1729, 1639, 1597, 1510, 1482, 1434, 1400, 1288, 1221, 1162, 838, 760, 695  $\text{cm}^{-1}$ . Mass calculated  $[\text{M}^+]$ : 278.1096, HRMS  $[\text{M}^+]$ : 278.1097. MP: 157-160°C.

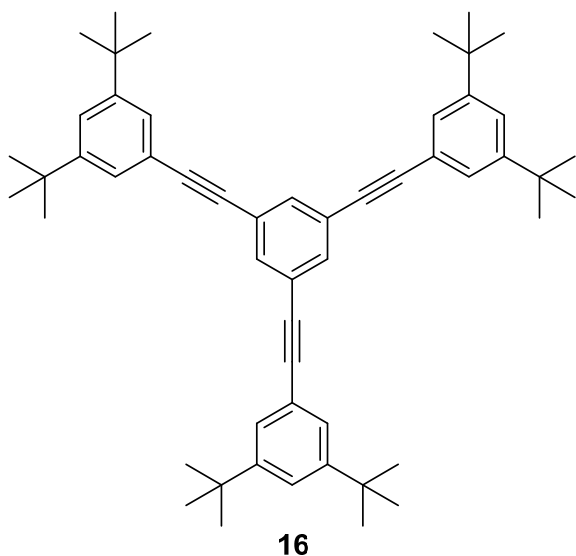

**1,3,5-tris((3,5-di-tert-butylphenyl)ethynyl)benzene (16)**<sup>34</sup>

Isolated as a light brown oil (26.4 mg, 0.04 mmol, 74%).  $^1\text{H}$  NMR (400 MHz,  $\text{CDCl}_3$ ):  $\delta$  7.69 (s, 3H), 7.43 (q,  $J = 1.88$  Hz, 3H), 7.40 (d,  $J = 1.8$  Hz, 6H), 1.35 (s, 54H).  $^{13}\text{C}$  NMR (100 MHz,  $\text{CDCl}_3$ ):  $\delta$  151.1, 134.0, 126.1, 124.3, 123.2, 122.0, 91.7, 86.9, 35.0, 31.5. IR:  $\nu$  2967, 2932, 2856, 1670, 1597, 1561, 1465, 1443, 1378, 1358, 1263, 1249, 1094, 1021, 881, 793  $\text{cm}^{-1}$ . Mass calculated  $[\text{M}^+]$ : 714.5165, HRMS  $[\text{M}^+]$ : 714.5164.

For substrate **3o**, following the above general procedure, no reaction was observed at 150 °C. However, using mesitylene as the solvent at 170 °C only led to formation of 2-phenylfuran (**4o'**), which was confirmed by <sup>1</sup>H-NMR, IR and GC-MS (Scheme S1).<sup>52</sup> The yield of **4o'** was not determined due to the separation difficulty from mesitylene.

**Scheme S1.** Cycloisomerization of Compound **3o** to Furan<sup>a</sup>

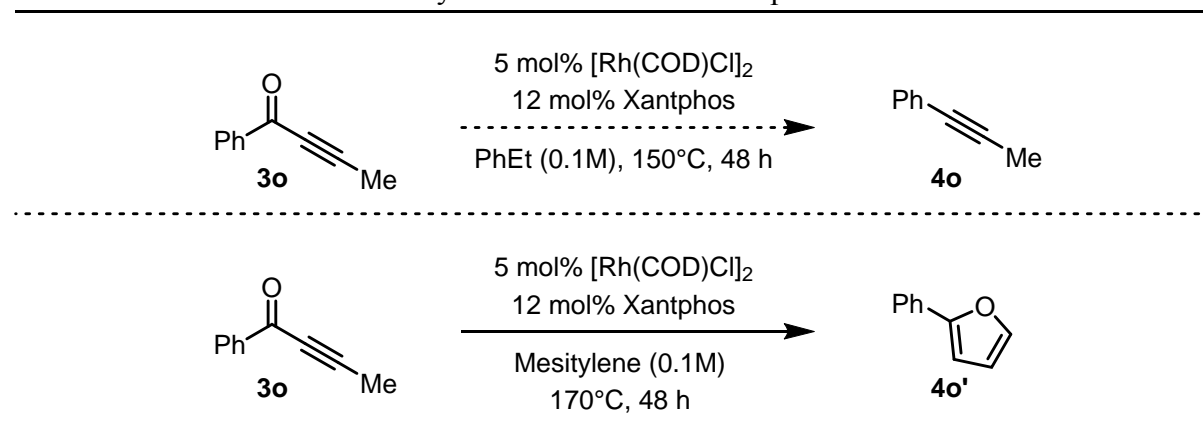

<sup>a</sup> Reactions on 0.200 mmol scale

## References:

1. (a) Substrate **1u** prepared according to a literature procedure: S. Sasaki, Y. Ikekame, M. Tanayama, T. Yamauchi, K. Higashiyama, *Synlett.*, 2012, **23**, 2699-2703; (b) Substrate **3o** prepared according to a literature procedure: J. Suffert, D. Toussaint, *J. Org. Chem.*, 1995, **60**, 3550-3553.
2. X.-F. Wu, H. Neumann, M. Beller, *Chem. Eur. J.*, 2010, **16**, 12104-12107.
3. A. Park, K. Park, Y. Kim, S. Lee, *Org. Lett.*, 2011, **13**, 944-947.
4. X.-F. Wu, B. Sundararaju, H. Neumann, P. H. Dixneuf, M. Beller, *Chem. Eur. J.*, 2011, **17**, 106-110.
5. R. Lerebours, A. Camacho-Soto, C. Wolf, *J. Org. Chem.*, 2005, **70**, 8601-8604.
6. P. Rao, N. Praveen, *J. Med. Chem.*, 2004, **47**, 3972-3990.
7. K. Yoshizawa, T. Shioiri, *Tetrahedron*, 2007, **63**, 6259-6286.
8. Y. Nishihara, D. Saito, E. Inoue, Y. Okada, M. Miyazaki, Y. Inoue, K. Takagi, *Tetrahedron Lett.*, 2010, **51**, 306-308.
9. V. O. Iaroshenko, S. Mkrtchyan, A. Villinger, *Synthesis*, 2013, **45**, 205-218.

10. R. J. Cox, D. J. Ritson, T. A. Dane, J. Berge, J. P. H. Charmant, A. Kantacha, *Chem. Commun.*, 2005, 1037-1039.
11. J. Y. Chen, T. C. Lin, S. C. Chen, A. J. Chen, C. Y. Mou, F. Y. Tsai, *Tetrahedron*, 2009, **65**, 10134-10141.
12. C. Boersch, E. Merkul, T. J. J. Muller, *Angew. Chem. Int. Ed.*, 2011, **50**, 10448-10452.
13. J. P. Waldo, R. C. Larock, *J. Org. Chem.*, 2007, **72**, 9643-9647.
14. J. Liu, X. Peng, W. Sun, Y. Zhao, C. Xia, *Org. Lett.*, 2008, **10**, 3933-3936.
15. D. A. Alonso, C. Nájera, M. C. Pacheco, *J. Org. Chem.*, 2004, **69**, 1615-1619.
16. C. Feng, T. P. Loh, *Chem. Commun.*, 2010, **46**, 4779-4781.
17. P. H. Li, L. Wang, H. J. Li, *Tetrahedron*, 2005, **61**, 8633-8640.
18. H. Huang, H. Liu, H. Jiang, K. Chen, *J. Org. Chem.*, 2008, **73**, 6037-6040.
19. J. Moon, M. Jang, S. Lee, *J. Org. Chem.*, 2009, **74**, 1403-1406.
20. M. Feuerstein, F. Berthiol, H. Doucet, M. Santelli, *Synthesis*, 2004, 1281-1289.
21. Y. Liang, Y.-X. Xie, J.-H. Li, *J. Org. Chem.*, 2006, **71**, 379-381.
22. L. Melzig, A. Metzger, P. Knochel, *Chem. Eur. J.*, 2011, **17**, 2948-2956.
23. M.-Y. Wu, J.-C. Mao, J. Guo, S.-J. Ji, *Eur. J. Org. Chem.*, 2008, 4050-4054.
24. S. A. Johnson, F.-Q. Liu, M. C. Suh, S. Zörcher, M. Haufe, S. S. Mao, T. D. Tilley, *J. Am. Chem. Soc.*, 2003, **125**, 4199-4211.
25. A. Orita, N. Yoshioka, P. Struwe, A. Braier, A. Beckmann, J. Otera, *Chem. Eur. J.*, 1999, **5**, 1355-1363.
26. A. Sagadevan, K. C. Hwang, *Adv. Synth. Catal.*, 2012, **354**, 3421-3427.
27. A. D. Finke, E. C. Elleby, M. J. Boyd, H. Weissman, J. S. Moore, *J. Org. Chem.*, 2009, **74**, 8897-8900.
28. M. Csékei, Z. Novák, A. Kotschy, *Tetrahedron*, 2008, **64**, 975-982.
29. J. Moon, M. Jeong, H. Nam, J. Ju, J. H. Moon, H. M. Jung, S. Lee, *Org. Lett.*, 2008, **10**, 945-948.
30. Z. Wang, W. Lin, C. Jiang, Q. Guo, *Chin. Sci. Bull.*, 2001, **46**, 1606-1608.
31. J. Gil-Molto, C. Najera, *Adv. Synth. Catal.*, 2006, **348**, 1874-1882.
32. A. M. Johnson, O. Moshe, A. S. Gamboa, B. W. Langloss, J. F. K. Limtiaco, C. K. Larive, R. J. Hooley, *Inorg. Chem.*, 2011, **50**, 9430-9442.
33. S. Prateptongkum, K. M. Driller, R. Jackstell, A. Spannenberg, M. Beller, *Chem. Eur. J.*, 2010, **16**, 9606-9615.
34. H. Yu, J. Li, Z. Kou, X. Du, Y. Wei, H.-K. Fun, J. Xu, Y. Zhang, *J. Org. Chem.*, 2010, **75**, 2989-3001.
35. X. Qu, T. Li, P. Sun, Y. Zhu, H. Yang, J. Mao, *Org. Biomol. Chem.*, 2011, **9**, 6938-6942.
36. A. L. Thompson, K. M. Gaab, J. Xu, C. J. Bardeen, T. J. Martinez, *J. Phys. Chem. A*, 2004, **108**, 671-682.
37. H. Yuan, Y. Shen, S. Yu, L. Shan, Q. Sun, W. Zhang, *Synth. Comm.*, 2013, **43**, 2817-2823.
38. B. Huang, L. Yin, M. Cai, *New J. Chem.*, 2013, **37**, 3137-3144.
39. I. E. Sokolov, A. S. Zania, S. I. Shergina, M. S. Shvartsberg, *Izvestiya Akademii Nauk*, 1996, 147-149.
40. C. Taylor, Y. Bolshan, *Org. Lett.*, 2014, **16**, 488-491.
41. W. Kim, K. Park, A. Park, J. Choe, S. Lee, *Org. Lett.*, 2013, **15**, 1654-1657.
42. J. Liu, X. Peng, W. Sun, Y. Zhao, C. Xia, *Org. Lett.*, 2008, **10**, 3933-3936.
43. C.-M. Yu, J.-H. Kwein, P.-S. Ho, S.-C. Kang, G. Lee, *Synlett*, 2005, 2631-2634.

44. W. P. Gallagher, R. E. Maleczka, *J. Org. Chem.*, 2003, **68**, 6775-6779.
45. J. Liu, X. Xie, S. Ma, *Synthesis*, 2012, **44**, 1569-1576.
46. X.-F. Wu, H. Neumann, M. Beller, *Angew. Chem. Int. Ed.*, 2011, **50**, 11142-11146.
47. CAS Number: 1817-57-8
48. C.-C. Tai, M.-S. Yu, Y.-L. Chen, W.-H. Chuang, T.-H. Lin, G. P. A. Yap, T.-G. Ong, *Chem. Commun.*, 2014, **50**, 4344-4346.
49. J. L. Garcia Ruano, J. Aleman, L. Marzo, C. Alvarado, M. Tortosa, S. Diaz-Tendero, A. Fraile, *Chem. Eur. J.*, 2012, **18**, 8414-8422.
50. Z.-F. Xu, C.-X. Cai, J.-T. Liu, *Org. Lett.*, 2013, **15**, 2096-2099.
51. S. R. K. Minkler, N. A. Isley, D. J. Lippincott, N. Krause, B. H. Lipshutz, *Org. Lett.*, 2014, **16**, 724-726.
52. For selected examples of cycloisomerizations of ynones to furans, see: (a) H. Sheng, S. Lin, Y. Z. Huang, *Tetrahedron Lett.*, 1986, **27**, 4893; (b) A. Kel'in, V. Gevorgyan, *J. Org. Chem.*, 2002, **67**, 95.



## Section 2: Computational details

### Part I. Computed Energies of All Stationary Points

Thermal correction to Gibbs Free Energy by B3LYP ( $TCGFE_{B3LYP}$  in Hartree)

Sum of electronic and thermal Enthalpies by B3LYP ( $H_{B3LYP}$ , in Hartree)

Sum of electronic and thermal Free Energies by B3LYP ( $G_{B3LYP}$ , in Hartree)

Single point energies were calculated by M06L//B3LYP method ( $E_{M06L}$ , in Hartree)

Total free energy in solution calculated by M06L//B3LYP method ( $E_{M06L,sol}$ , in Hartree)

| name      | $TCGFE_{B3LYP}$ | $H_{B3LYP}$  | $G_{B3LYP}$  | $E_{M06L}$   | $E_{M06L,sol}$ |
|-----------|-----------------|--------------|--------------|--------------|----------------|
| CO        | -0.014102       | -113.298573  | -113.321016  | -113.330193  | -113.325763    |
| CAT-2a    | 0.704040        | -3371.741858 | -3371.883626 | -3372.973193 | -3373.026397   |
| 1a        | 0.159441        | -652.555606  | -652.611834  | -652.859999  | -652.879496    |
| 2a        | 0.152858        | -539.246874  | -539.297935  | -539.514874  | -539.531737    |
| INT1-A    | 0.710957        | -3485.055655 | -3485.202352 | -3486.322624 | -3486.377773   |
| INT2-A    | 0.713023        | -3485.042641 | -3485.187255 | -3486.311292 | -3486.365565   |
| INT2-B    | 0.710970        | -3485.024666 | -3485.170579 | -3486.298465 | -3486.352335   |
| INT3-A    | 0.709872        | -3485.023925 | -3485.170812 | -3486.297685 | -3486.347748   |
| INT3-deCO | 0.702682        | -3371.696597 | -3371.839547 | -3372.921221 | -3372.980061   |
| INT4-A    | 0.708357        | -3485.016572 | -3485.164562 | -3486.290939 | -3486.344336   |
| INT5-A    | 0.708069        | -3485.064862 | -3485.213461 | -3486.338217 | -3486.388933   |
| TS1-A     | 0.713029        | -3485.018250 | -3485.160860 | -3486.286566 | -3486.340722   |
| TS1-B     | 0.711718        | -3484.978431 | -3485.122242 | -3486.250577 | -3486.305055   |
| TS2-A     | 0.710139        | -3485.013013 | -3485.158302 | -3486.285456 | -3486.336356   |
| TS3-A     | 0.707743        | -3485.001021 | -3485.148031 | -3486.273472 | -3486.325423   |
| TS3S-A    | 0.707389        | -3484.989620 | -3485.136746 | -3486.262244 | -3486.314302   |
| TS3-deCO  | 0.701510        | -3371.667168 | -3371.809519 | -3372.892620 | -3372.949072   |

|         |          |              |              |              |              |
|---------|----------|--------------|--------------|--------------|--------------|
| 1t      | 0.110417 | -460.874719  | -460.923370  | -461.099773  | -461.114731  |
| 2t      | 0.103453 | -347.565198  | -347.609352  | -347.755158  | -347.766859  |
| CAT-2t  | 0.654444 | -3180.057555 | -3180.192473 | -3181.205912 | -3181.254683 |
| INT1-1t | 0.662093 | -3293.378382 | -3293.517514 | -3294.561512 | -3294.612127 |
| INT2-1t | 0.659660 | -3293.363860 | -3293.505253 | -3294.542752 | -3294.598155 |
| INT3-1t | 0.659639 | -3293.352948 | -3293.493567 | -3294.536967 | -3294.584053 |
| INT4-1t | 0.660565 | -3293.345583 | -3293.485153 | -3294.532173 | -3294.580926 |
| INT5-1t | 0.659716 | -3293.384817 | -3293.525733 | -3294.572152 | -3294.618917 |
| TS1-1t  | 0.661165 | -3293.336023 | -3293.474232 | -3294.522219 | -3294.572082 |
| TS2-1t  | 0.660101 | -3293.338335 | -3293.477008 | -3294.521918 | -3294.569937 |
| TS3-1t  | 0.656915 | -3293.317429 | -3293.458815 | -3294.501802 | -3294.550400 |

## Part II.

### 1. Discussion of Different Structures of INT1-A

To find the minimum of the starting intermediate of the catalytic cycle (**INT1-A**), we go through different coordination structures. Here we present four main coordination structures: the carbonyl group coordinating (**S1**), the alkynyl group coordinating (**S2**), the carbonyl group coordinating with extra coordination of the oxygen atom from xantphos ligand (**S3**) and the alkynyl group coordinating with extra coordination of the oxygen atom from xantphos ligand (**INT1-A**). The computational results indicate that coordination of the carbonyl group is more thermodynamically unstable than coordination of the alkynyl group (**S1** vs **S2**, **S3** vs **INT1-A**). It also shows that the extra coordination of the oxygen atom from the xantphos ligand plays a stabilizing effect in **S3** and **INT1-A**. This could be understood by the extra coordination of the oxygen atom making the rhodium center become approximately  $18e^-$  which stabilizes the thermodynamic energy of **S3** and **INT1-A** compared to **S1** and **S2** ( $16e^-$  structures).

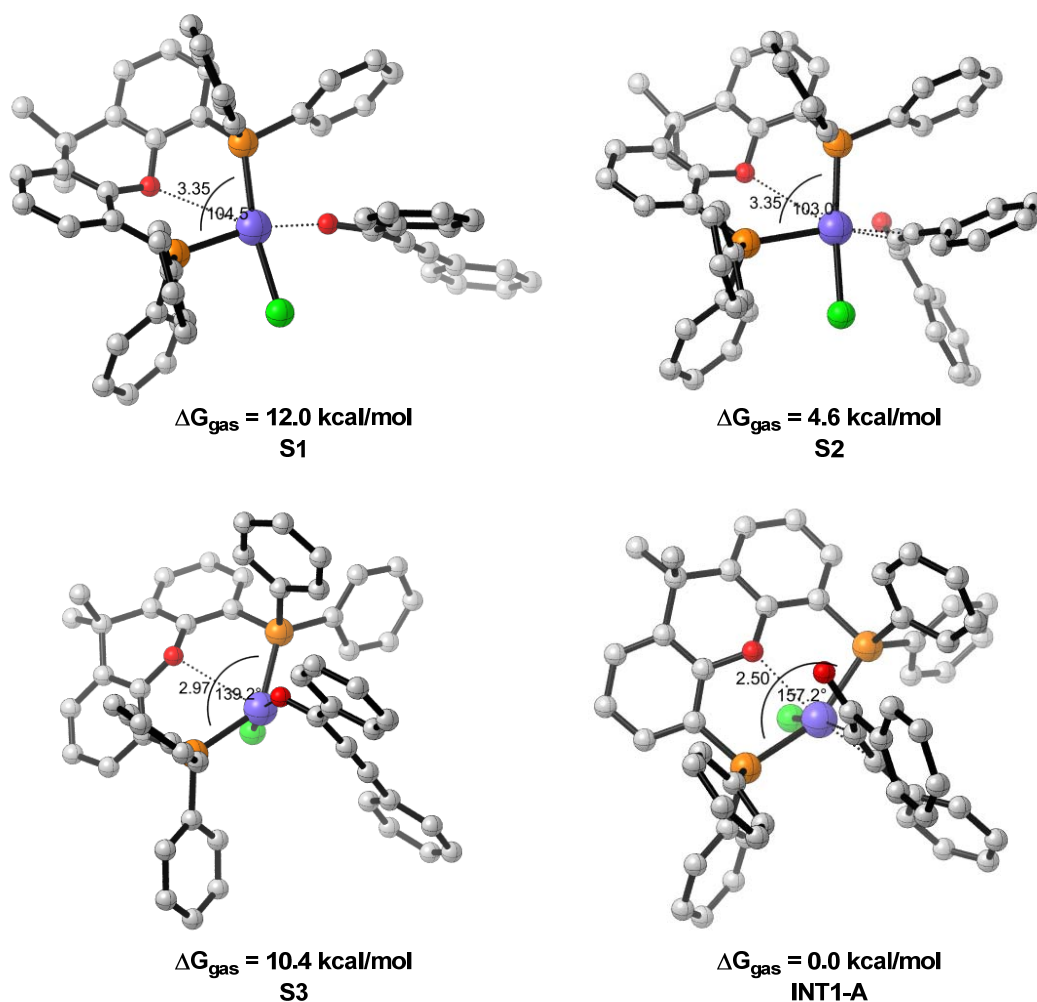

Figure S1 Four mainly coordination structures of starting intermediate (distances in Å).

## 2. Discussion of TS1

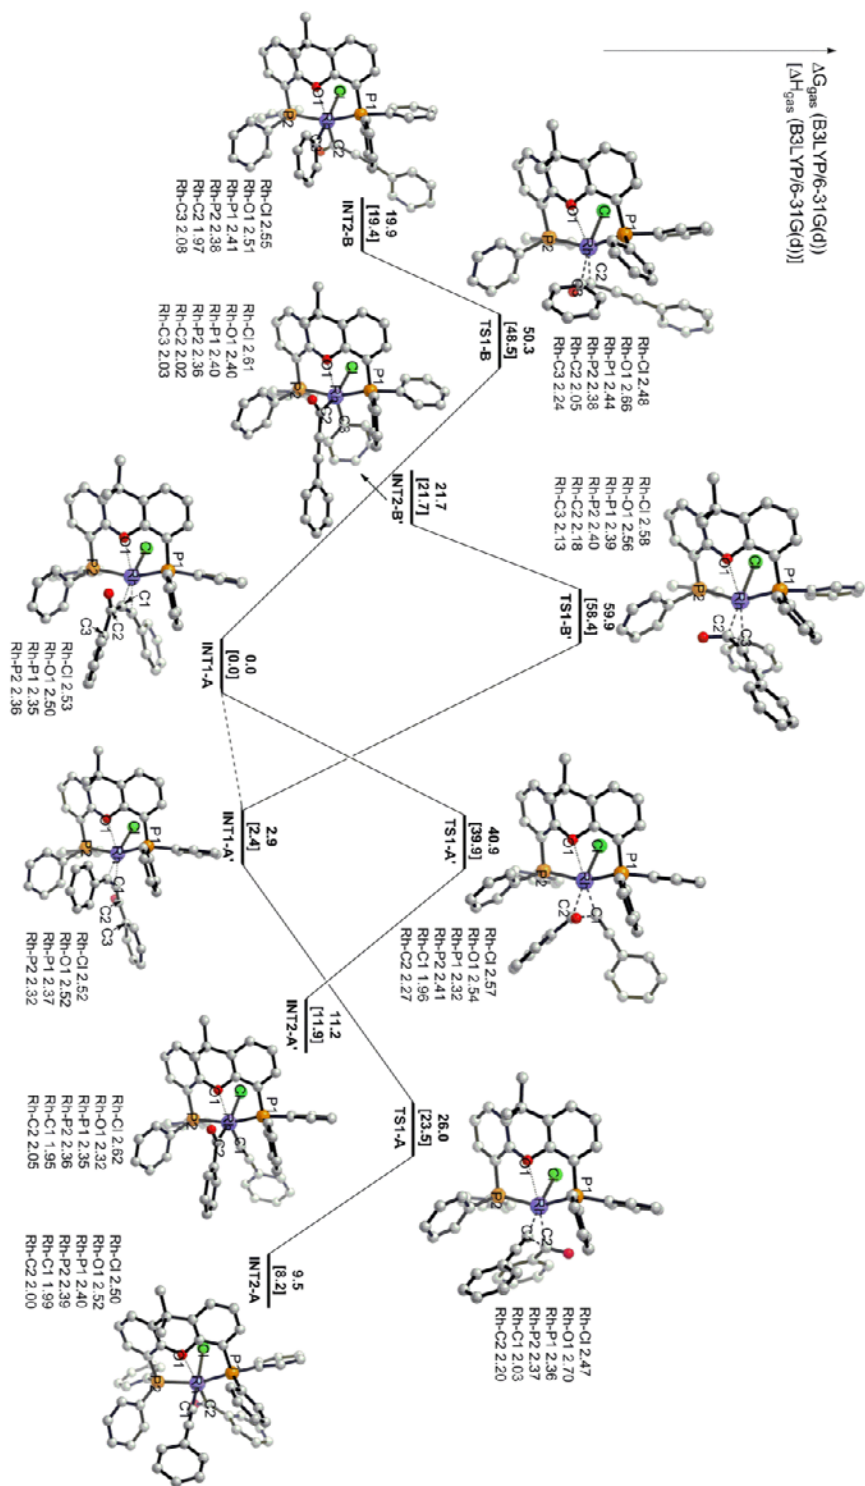

Figure S2 Discussion of TS1 (distances in Å, hydrogen atoms were omitted for clarity).

### 3. Discussion of the Difference of Reactivities between Different Ligands: Xantphos vs dppp

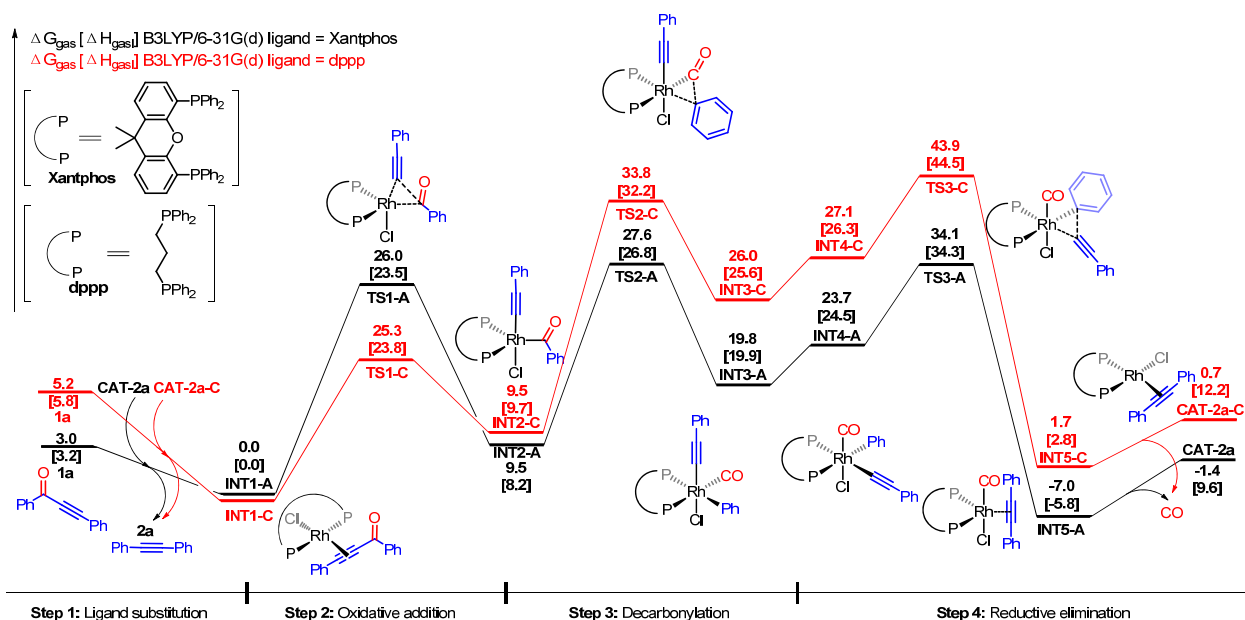

Figure S3 Comparison of the energy profiles of xantphos (black) and dppp (red).

We have explored the reactivities between xantphos and dppp in B3LYP/6-31G(d) level (figure S1). At the oxidative addition step, the activation energy of transition-state structures with dppp is slightly more favorable than that with xantphos. The activation energy of the decarbonylation step becomes 6.2 kcal/mol higher than that with xantphos. The reductive elimination step is also the rate-determining step for both ligands. The activation energy of dppp is 6.4 kcal/mol higher than that of xantphos for this step (16.8 kcal/mol for dppp and 10.4 kcal/mol for xantphos) and the total activation energy is 9.8 kcal/mol higher. This indicates that using dppp as the ligand is disfavored in this reaction.

### Part III. Coordinates of All Stationary Points

#### 1. Coordinates of all stationary points in figure 2

##### CO

Cartesian coordinates

| ATOM | X          | Y          | Z           |
|------|------------|------------|-------------|
| O    | 0.00000000 | 0.00000000 | 0.48761100  |
| C    | 0.00000000 | 0.00000000 | -0.65014800 |

##### CAT-2a

Cartesian coordinates

| ATOM | X           | Y          | Z           |
|------|-------------|------------|-------------|
| C    | 2.41489800  | 1.84216600 | -0.47317400 |
| C    | 3.63026400  | 2.45730800 | -0.80426900 |
| H    | 4.49118000  | 1.83745400 | -1.03126400 |
| C    | 3.74360200  | 3.84253800 | -0.86929200 |
| H    | 4.68997500  | 4.30008400 | -1.14236600 |
| C    | 2.63989700  | 4.64028500 | -0.57703600 |
| H    | 2.74545500  | 5.71851500 | -0.61617400 |
| C    | 1.40888400  | 4.07543500 | -0.22872200 |
| C    | 1.30967200  | 2.67677600 | -0.21315900 |
| C    | 0.20149400  | 4.90153000 | 0.22303100  |
| C    | -1.06892600 | 4.17568400 | -0.22877100 |
| C    | -1.08413200 | 2.77373700 | -0.21085900 |
| C    | -2.25446300 | 2.03130200 | -0.46660300 |

|   |             |             |             |
|---|-------------|-------------|-------------|
| C | -3.41490900 | 2.74261900  | -0.80174700 |
| H | -4.32357700 | 2.19503000  | -1.02850500 |
| C | -3.41393300 | 4.13234000  | -0.87230400 |
| H | -4.31916500 | 4.66480300  | -1.14905400 |
| C | -2.24936800 | 4.83826200  | -0.58035200 |
| H | -2.26656600 | 5.92135500  | -0.62273400 |
| C | 0.20341800  | 4.95138900  | 1.77950300  |
| H | 0.16590900  | 3.94576700  | 2.21002100  |
| H | -0.66634400 | 5.51096500  | 2.14295700  |
| H | 1.11250100  | 5.44456900  | 2.14289100  |
| C | 0.25945400  | 6.34608800  | -0.30625000 |
| H | 1.15571500  | 6.85704400  | 0.05713500  |
| H | -0.59237500 | 6.92727100  | 0.05848200  |
| H | 0.25991600  | 6.37910500  | -1.40075700 |
| C | 3.53058800  | -0.60958400 | -1.64801000 |
| C | 4.88041700  | -0.82890200 | -1.32214700 |
| H | 5.23450000  | -0.65020800 | -0.31199600 |
| C | 5.77632900  | -1.29102400 | -2.28776700 |
| H | 6.81658200  | -1.45688000 | -2.01956400 |
| C | 5.33656700  | -1.54386000 | -3.58819300 |
| H | 6.03403400  | -1.90709700 | -4.33865200 |
| C | 3.99675100  | -1.33179000 | -3.91813300 |
| H | 3.64595700  | -1.52687400 | -4.92812200 |
| C | 3.09535900  | -0.87085700 | -2.95728200 |
| H | 2.05777400  | -0.69176300 | -3.21932600 |

|   |             |             |             |
|---|-------------|-------------|-------------|
| C | 3.14562000  | -0.43763000 | 1.19391200  |
| C | 3.30445900  | -1.80027200 | 1.50221100  |
| H | 2.96030900  | -2.55733500 | 0.80332900  |
| C | 3.89936400  | -2.19066000 | 2.70038000  |
| H | 4.01550700  | -3.24773600 | 2.92377900  |
| C | 4.33629900  | -1.22817200 | 3.61420000  |
| H | 4.79527800  | -1.53372700 | 4.55063700  |
| C | 4.17671200  | 0.12566600  | 3.32046900  |
| H | 4.51383400  | 0.88080300  | 4.02585000  |
| C | 3.58494700  | 0.52030700  | 2.11782500  |
| H | 3.47314500  | 1.57754900  | 1.90027700  |
| C | -3.56964800 | -0.33829600 | -1.61464100 |
| C | -4.93368300 | -0.41923900 | -1.28389800 |
| H | -5.26698700 | -0.17847100 | -0.27942900 |
| C | -5.87064900 | -0.82225300 | -2.23673300 |
| H | -6.92170200 | -0.88069200 | -1.96577900 |
| C | -5.45772400 | -1.15442700 | -3.52827900 |
| H | -6.18736000 | -1.47203600 | -4.26880200 |
| C | -4.10430100 | -1.08126200 | -3.86219300 |
| H | -3.77494600 | -1.34008400 | -4.86498800 |
| C | -3.16189800 | -0.67910100 | -2.91427600 |
| H | -2.11235500 | -0.60816400 | -3.17936700 |
| C | -3.15004800 | -0.17409400 | 1.22192200  |
| C | -3.39923100 | -1.51933500 | 1.54703800  |
| H | -3.11051600 | -2.30646900 | 0.85624700  |



|    |             |             |             |
|----|-------------|-------------|-------------|
| C  | -4.01149700 | -1.85431500 | 2.75320300  |
| H  | -4.19731000 | -2.89837100 | 2.99037500  |
| C  | -4.37714000 | -0.85376800 | 3.65754300  |
| H  | -4.85030600 | -1.11656400 | 4.59988200  |
| C  | -4.12835800 | 0.48271000  | 3.34665500  |
| H  | -4.40989600 | 1.26711900  | 4.04446400  |
| C  | -3.51788400 | 0.82219500  | 2.13648200  |
| H  | -3.33460800 | 1.86649000  | 1.90534300  |
| O  | 0.08731000  | 2.08592700  | 0.09312000  |
| P  | 2.30909500  | -0.00893300 | -0.39295100 |
| P  | -2.29700800 | 0.17780400  | -0.37521300 |
| Cl | 0.01266200  | 0.69211200  | -2.80542500 |
| Rh | -0.01338300 | -0.35853900 | -0.50011700 |
| C  | -0.10325300 | -2.32676300 | 0.12889900  |
| C  | -0.05977200 | -1.61698900 | 1.19886800  |
| C  | -0.02481300 | -1.50758600 | 2.63579800  |
| C  | 0.01364500  | -2.66073400 | 3.45067600  |
| C  | -0.02765600 | -0.24962800 | 3.26943400  |
| C  | 0.04158200  | -2.55526600 | 4.83772200  |
| H  | 0.03301900  | -3.63964900 | 2.98134800  |
| C  | -0.00161600 | -0.14868300 | 4.65855500  |
| H  | -0.05322200 | 0.64178300  | 2.65083800  |
| C  | 0.03183000  | -1.29846100 | 5.45077900  |
| H  | 0.07176300  | -3.45709000 | 5.44451300  |
| H  | -0.00683600 | 0.83313400  | 5.12554200  |

|   |             |             |             |
|---|-------------|-------------|-------------|
| H | 0.05186500  | -1.21784500 | 6.53444800  |
| C | -0.19629400 | -3.57302100 | -0.58973800 |
| C | -0.03470500 | -3.61203000 | -1.98960600 |
| C | -0.45506400 | -4.78355800 | 0.09076600  |
| C | -0.11773700 | -4.81966100 | -2.67933700 |
| H | 0.15416100  | -2.68067000 | -2.51496500 |
| C | -0.53971900 | -5.98566200 | -0.60607700 |
| H | -0.59915700 | -4.76801200 | 1.16697000  |
| C | -0.36922600 | -6.01094400 | -1.99369100 |
| H | 0.01188900  | -4.83026700 | -3.75849000 |
| H | -0.74114300 | -6.90699400 | -0.06513600 |
| H | -0.43509300 | -6.95105000 | -2.53486700 |

## 1a

Cartesian coordinates

| ATOM | X           | Y           | Z           |
|------|-------------|-------------|-------------|
| C    | -1.37067500 | 1.34003200  | -0.00001500 |
| O    | -1.58226500 | 2.54924600  | -0.00003100 |
| C    | -0.00895600 | 0.83824300  | -0.00000300 |
| C    | 1.15700300  | 0.48993100  | 0.00000300  |
| C    | 2.52789400  | 0.10211300  | 0.00000700  |
| C    | 2.89045600  | -1.25980600 | -0.00005300 |
| C    | 3.54019800  | 1.08329000  | 0.00007600  |
| C    | 4.23316100  | -1.62714300 | -0.00004700 |
| H    | 2.11166800  | -2.01612800 | -0.00010600 |

|   |             |             |             |
|---|-------------|-------------|-------------|
| C | 4.88018900  | 0.70622400  | 0.00008300  |
| H | 3.25934700  | 2.13170200  | 0.00012400  |
| C | 5.22980300  | -0.64713300 | 0.00002100  |
| H | 4.50391400  | -2.67925100 | -0.00009600 |
| H | 5.65394500  | 1.46872400  | 0.00013600  |
| H | 6.27675300  | -0.93770400 | 0.00002600  |
| C | -2.48151300 | 0.34089700  | -0.00001200 |
| C | -2.24273500 | -1.04051300 | 0.00003700  |
| C | -3.80213900 | 0.81640400  | -0.00005500 |
| C | -3.31142800 | -1.93615000 | 0.00004300  |
| H | -1.22028500 | -1.40601600 | 0.00006900  |
| C | -4.86733000 | -0.07890600 | -0.00005100 |
| H | -3.96362500 | 1.88939200  | -0.00009000 |
| C | -4.62340500 | -1.45677000 | -0.00000200 |
| H | -3.12204900 | -3.00604600 | 0.00008200  |
| H | -5.88853200 | 0.29229800  | -0.00008700 |
| H | -5.45614800 | -2.15520500 | 0.00000200  |

## 2a

Cartesian coordinates

| ATOM | X           | Y           | Z           |
|------|-------------|-------------|-------------|
| C    | -0.60825700 | -0.00000200 | 0.00000100  |
| C    | 0.60825700  | -0.00000200 | -0.00000200 |
| C    | 2.03323900  | -0.00000100 | 0.00000000  |
| C    | 2.75093200  | -1.21362400 | 0.00184100  |

|   |             |             |             |
|---|-------------|-------------|-------------|
| C | 2.75093000  | 1.21362400  | -0.00184200 |
| C | 4.14329400  | -1.20876100 | 0.00184600  |
| H | 2.20316900  | -2.15098900 | 0.00326200  |
| C | 4.14329200  | 1.20876300  | -0.00184500 |
| H | 2.20316600  | 2.15098800  | -0.00326400 |
| C | 4.84470900  | 0.00000100  | 0.00000100  |
| H | 4.68362100  | -2.15162300 | 0.00328300  |
| H | 4.68361800  | 2.15162500  | -0.00328300 |
| H | 5.93125100  | 0.00000200  | 0.00000100  |
| C | -2.03323900 | -0.00000100 | 0.00000000  |
| C | -2.75093200 | -1.21362400 | -0.00184100 |
| C | -2.75093000 | 1.21362400  | 0.00184200  |
| C | -4.14329400 | -1.20876100 | -0.00184500 |
| H | -2.20316900 | -2.15098900 | -0.00326300 |
| C | -4.14329200 | 1.20876300  | 0.00184500  |
| H | -2.20316500 | 2.15098700  | 0.00326300  |
| C | -4.84470900 | 0.00000100  | 0.00000000  |
| H | -4.68362100 | -2.15162300 | -0.00328300 |
| H | -4.68361800 | 2.15162500  | 0.00328300  |
| H | -5.93125100 | 0.00000200  | 0.00000000  |

### INT1-2a

Cartesian coordinates

| ATOM | X           | Y          | Z          |
|------|-------------|------------|------------|
| C    | -1.64050700 | 2.75793100 | 0.31822400 |

|   |             |             |             |
|---|-------------|-------------|-------------|
| C | -2.07571900 | 4.08999700  | 0.33127700  |
| H | -1.40769900 | 4.86894000  | -0.02063000 |
| C | -3.35480900 | 4.42421100  | 0.76460400  |
| H | -3.68129900 | 5.45995400  | 0.75375500  |
| C | -4.21220100 | 3.42550800  | 1.22046200  |
| H | -5.19918700 | 3.70166700  | 1.57371800  |
| C | -3.81990300 | 2.08321100  | 1.23938200  |
| C | -2.54369100 | 1.76739100  | 0.75190500  |
| C | -4.66840800 | 0.96922300  | 1.85813100  |
| C | -4.38567300 | -0.32985800 | 1.09914800  |
| C | -3.08886900 | -0.56097100 | 0.61742100  |
| C | -2.70587700 | -1.79556600 | 0.05682700  |
| C | -3.68639800 | -2.78941800 | -0.06516500 |
| H | -3.42314400 | -3.74111800 | -0.51443500 |
| C | -4.99268400 | -2.56689400 | 0.35844400  |
| H | -5.74366600 | -3.34274900 | 0.24185300  |
| C | -5.33136700 | -1.34822300 | 0.94199000  |
| H | -6.34807000 | -1.19616400 | 1.28620800  |
| C | -4.20568600 | 0.77497400  | 3.33273800  |
| H | -3.14208600 | 0.52211400  | 3.38659200  |
| H | -4.77424700 | -0.03436300 | 3.80550900  |
| H | -4.36731800 | 1.69573400  | 3.90531600  |
| C | -6.16755800 | 1.32035300  | 1.86030000  |
| H | -6.35343800 | 2.22897800  | 2.44001700  |
| H | -6.75074100 | 0.52901900  | 2.33967900  |

|   |             |             |             |
|---|-------------|-------------|-------------|
| H | -6.55199700 | 1.47015300  | 0.84591900  |
| C | 0.47946600  | 3.61371900  | -1.53358600 |
| C | 1.00721700  | 4.87092700  | -1.19016700 |
| H | 1.19599400  | 5.11747700  | -0.15011500 |
| C | 1.30811700  | 5.80662900  | -2.18101100 |
| H | 1.71607100  | 6.77432500  | -1.90058100 |
| C | 1.09152000  | 5.49754500  | -3.52525700 |
| H | 1.32949300  | 6.22550500  | -4.29665700 |
| C | 0.57263100  | 4.24939200  | -3.87360800 |
| H | 0.40272500  | 4.00121900  | -4.91793100 |
| C | 0.26876900  | 3.30889300  | -2.88771900 |
| H | -0.15055600 | 2.34535000  | -3.15819600 |
| C | 1.15554700  | 2.84298000  | 1.15635300  |
| C | 2.54845000  | 2.82059500  | 0.96420800  |
| H | 2.95991300  | 2.57015100  | -0.00986300 |
| C | 3.41330500  | 3.12595200  | 2.01423900  |
| H | 4.48732000  | 3.10704000  | 1.84958500  |
| C | 2.90142500  | 3.44970400  | 3.27346100  |
| H | 3.57615300  | 3.68546200  | 4.09217300  |
| C | 1.52129000  | 3.46586200  | 3.47465100  |
| H | 1.11468400  | 3.71256100  | 4.45180200  |
| C | 0.65272400  | 3.16249500  | 2.42421200  |
| H | -0.41801400 | 3.17233300  | 2.59775900  |
| C | -1.14445600 | -3.32096300 | -1.90735100 |
| C | -1.20458600 | -4.71144800 | -1.70845100 |

|    |             |             |             |
|----|-------------|-------------|-------------|
| H  | -1.14055600 | -5.12231400 | -0.70613200 |
| C  | -1.33387700 | -5.57747900 | -2.79559800 |
| H  | -1.37759100 | -6.65020600 | -2.62573900 |
| C  | -1.40270800 | -5.06776000 | -4.09333600 |
| H  | -1.50073100 | -5.74301000 | -4.93951100 |
| C  | -1.34335500 | -3.68815500 | -4.29866800 |
| H  | -1.39850000 | -3.28366400 | -5.30589800 |
| C  | -1.21261700 | -2.81633600 | -3.21637700 |
| H  | -1.18730800 | -1.74302900 | -3.37664600 |
| C  | -0.27683300 | -3.19708700 | 0.84143700  |
| C  | 0.96850900  | -3.81450500 | 0.62962800  |
| H  | 1.47234100  | -3.70489900 | -0.32706100 |
| C  | 1.56035000  | -4.58176800 | 1.63212000  |
| H  | 2.52240500  | -5.05339800 | 1.45187100  |
| C  | 0.92502200  | -4.73340000 | 2.86692800  |
| H  | 1.38983000  | -5.32582200 | 3.65028800  |
| C  | -0.30472100 | -4.11458800 | 3.09070700  |
| H  | -0.80370100 | -4.22258100 | 4.05002100  |
| C  | -0.90262500 | -3.35072600 | 2.08606800  |
| H  | -1.85885900 | -2.87498300 | 2.27595500  |
| O  | -2.13356800 | 0.44166900  | 0.71457400  |
| P  | 0.07384000  | 2.34697300  | -0.25054700 |
| P  | -0.96949300 | -2.13649800 | -0.49742500 |
| Cl | -1.76952800 | 0.53379800  | -2.48242000 |
| Rh | -0.08609400 | 0.04262800  | -0.65973900 |

|   |            |             |             |
|---|------------|-------------|-------------|
| C | 1.88683200 | -0.53919300 | 1.93057800  |
| O | 1.05957700 | -0.21408500 | 2.78267400  |
| C | 1.60122400 | -0.41135100 | 0.51066200  |
| C | 1.92367300 | -0.34383000 | -0.73449900 |
| C | 2.87481500 | -0.31377300 | -1.82272100 |
| C | 4.25959100 | -0.19148800 | -1.57762400 |
| C | 2.42474600 | -0.37913800 | -3.15608300 |
| C | 5.16142900 | -0.14978200 | -2.63790200 |
| H | 4.61515700 | -0.12516800 | -0.55453500 |
| C | 3.33456500 | -0.34672400 | -4.21051800 |
| H | 1.35663800 | -0.44653400 | -3.33971100 |
| C | 4.70397500 | -0.23262700 | -3.95647500 |
| H | 6.22475000 | -0.05091900 | -2.43529100 |
| H | 2.97337600 | -0.40271100 | -5.23389400 |
| H | 5.41129700 | -0.20184100 | -4.78101500 |
| C | 3.23506700 | -1.05166300 | 2.36360400  |
| C | 4.05813600 | -1.83176100 | 1.54027200  |
| C | 3.65847200 | -0.75453100 | 3.66792000  |
| C | 5.28819800 | -2.29727300 | 2.00831200  |
| H | 3.72640400 | -2.08894300 | 0.54005300  |
| C | 4.89102400 | -1.20877900 | 4.13096500  |
| H | 3.00162700 | -0.16358000 | 4.29748800  |
| C | 5.70988800 | -1.98184300 | 3.30185600  |
| H | 5.91523900 | -2.90840800 | 1.36410700  |
| H | 5.21487600 | -0.96399400 | 5.13940000  |



|   |            |             |            |
|---|------------|-------------|------------|
| H | 6.67022800 | -2.33980500 | 3.66424900 |
|---|------------|-------------|------------|

## TS1-A

Cartesian coordinates

| ATOM | X           | Y           | Z           |
|------|-------------|-------------|-------------|
| Rh   | 0.03574200  | 0.05154000  | 0.71787300  |
| C    | -0.53257700 | 1.76694300  | -0.20305100 |
| C    | -0.56707800 | 2.04546400  | 1.42790700  |
| O    | 0.36592700  | 2.67323600  | 1.92923300  |
| C    | -0.83165800 | 2.55470100  | -1.11552300 |
| C    | 4.36164700  | -3.30620100 | -1.12984300 |
| H    | 4.85237600  | -4.18080100 | -1.54244500 |
| C    | 3.00663800  | -3.08193500 | -1.38639000 |
| C    | 2.40192100  | -1.95211200 | -0.81429000 |
| C    | 2.15708600  | -3.95462300 | -2.31281400 |
| C    | 0.75063400  | -4.02323100 | -1.71195900 |
| C    | 0.22896000  | -2.85983900 | -1.12373100 |
| C    | -1.09746900 | -2.78350900 | -0.65542200 |
| C    | -1.87831800 | -3.94427200 | -0.75327100 |
| H    | -2.89349700 | -3.93586500 | -0.37648000 |
| C    | -1.37004000 | -5.12162900 | -1.29193700 |
| H    | -1.99295900 | -6.01016200 | -1.33926700 |
| C    | -0.06421000 | -5.15571500 | -1.77412400 |
| H    | 0.31742700  | -6.07382200 | -2.20651100 |
| C    | 2.06536400  | -3.25332700 | -3.70015900 |

|   |            |             |             |
|---|------------|-------------|-------------|
| H | 1.64087500 | -2.24859800 | -3.61180100 |
| H | 1.43038000 | -3.83518000 | -4.37840100 |
| H | 3.06238000 | -3.16382500 | -4.14689200 |
| C | 2.76925900 | -5.35040700 | -2.51910500 |
| H | 3.76264900 | -5.27363700 | -2.97114300 |
| H | 2.16038700 | -5.94192900 | -3.20939600 |
| H | 2.85873800 | -5.90050400 | -1.57641100 |
| C | 3.31459600 | 0.89884100  | 2.17155000  |
| C | 4.54951800 | 1.56837800  | 2.12924200  |
| H | 4.96365200 | 1.88935400  | 1.17867700  |
| C | 5.24745800 | 1.84423500  | 3.30599500  |
| H | 6.20125600 | 2.36330600  | 3.25660600  |
| C | 4.71766600 | 1.46212800  | 4.53973600  |
| H | 5.25929600 | 1.68047700  | 5.45660400  |
| C | 3.48713700 | 0.80522100  | 4.59033600  |
| H | 3.06576900 | 0.50896500  | 5.54732200  |
| C | 2.78539200 | 0.52653600  | 3.41653300  |
| H | 1.83583100 | 0.00492900  | 3.45796500  |
| C | 2.93728100 | 1.83049600  | -0.52391700 |
| C | 2.78361700 | 3.18005700  | -0.15677300 |
| H | 2.30139900 | 3.42739300  | 0.78298000  |
| C | 3.24129300 | 4.19547500  | -0.99715400 |
| H | 3.13384900 | 5.23279900  | -0.68958800 |
| C | 3.83421400 | 3.88512600  | -2.22503200 |
| H | 4.19331700 | 4.67834300  | -2.87585600 |

|   |             |             |             |
|---|-------------|-------------|-------------|
| C | 3.96191500  | 2.55036500  | -2.60917700 |
| H | 4.41710600  | 2.29717800  | -3.56323800 |
| C | 3.52131800  | 1.52931500  | -1.76294500 |
| H | 3.64886000  | 0.49588600  | -2.06773700 |
| C | -3.12474200 | -1.80638100 | 1.25027600  |
| C | -4.35902500 | -2.36425000 | 0.86855900  |
| H | -4.61634200 | -2.46012100 | -0.18168900 |
| C | -5.27764100 | -2.78376700 | 1.83120400  |
| H | -6.22635100 | -3.21232800 | 1.51840400  |
| C | -4.97960900 | -2.65010500 | 3.18904300  |
| H | -5.69612000 | -2.97644300 | 3.93848300  |
| C | -3.76140200 | -2.09257800 | 3.57752100  |
| H | -3.52198300 | -1.98215800 | 4.63150400  |
| C | -2.83999000 | -1.66999100 | 2.61755900  |
| H | -1.88773900 | -1.25241400 | 2.92318100  |
| C | -2.83943800 | -0.63415400 | -1.40473900 |
| C | -4.09922500 | -0.03122700 | -1.25538400 |
| H | -4.54111800 | 0.06570100  | -0.26978600 |
| C | -4.80831200 | 0.42885600  | -2.36859000 |
| H | -5.79068000 | 0.87389400  | -2.23092400 |
| C | -4.26479800 | 0.30971900  | -3.64855800 |
| H | -4.81878500 | 0.66145700  | -4.51481800 |
| C | -3.00150800 | -0.26417100 | -3.80651800 |
| H | -2.56386400 | -0.35600300 | -4.79698500 |
| C | -2.29710100 | -0.73093300 | -2.69680600 |

|    |             |             |             |
|----|-------------|-------------|-------------|
| H  | -1.31995700 | -1.18097500 | -2.84093000 |
| O  | 1.04540500  | -1.74078400 | -1.02820400 |
| P  | 2.35075000  | 0.51825200  | 0.64135500  |
| P  | -1.84674700 | -1.22420000 | 0.04813700  |
| Cl | 0.59492800  | -1.86491900 | 2.17897400  |
| C  | 3.12757900  | -1.01734100 | -0.05135600 |
| H  | 5.06923200  | -0.59172200 | 0.77140200  |
| C  | 5.09978400  | -2.41589100 | -0.35278300 |
| C  | 4.48831100  | -1.27922900 | 0.16673300  |
| H  | 6.15116600  | -2.60555000 | -0.15677700 |
| C  | -1.15712800 | 3.48737200  | -2.13006100 |
| C  | -2.45995600 | 3.53495300  | -2.67686200 |
| C  | -0.18020600 | 4.38828500  | -2.61249200 |
| C  | -2.77201800 | 4.45956500  | -3.66789500 |
| H  | -3.20771700 | 2.83417400  | -2.32184000 |
| C  | -0.50290400 | 5.30654500  | -3.60620900 |
| H  | 0.82100900  | 4.34700500  | -2.19782100 |
| C  | -1.79712000 | 5.34712000  | -4.13444300 |
| H  | -3.77654400 | 4.48866800  | -4.08113000 |
| H  | 0.25503000  | 5.99463200  | -3.97055000 |
| H  | -2.04526300 | 6.06777900  | -4.90918400 |
| C  | -1.92082700 | 2.06114900  | 2.08486400  |
| C  | -1.93978500 | 2.11151000  | 3.48875500  |
| C  | -3.13324700 | 2.09392000  | 1.38673200  |
| C  | -3.15012700 | 2.16177500  | 4.17618600  |

|   |             |            |            |
|---|-------------|------------|------------|
| H | -0.99597200 | 2.11184800 | 4.02373000 |
| C | -4.34385900 | 2.16310900 | 2.07785100 |
| H | -3.12366100 | 2.08524800 | 0.30328500 |
| C | -4.35809000 | 2.18873500 | 3.47341100 |
| H | -3.15113800 | 2.19043800 | 5.26280900 |
| H | -5.27819900 | 2.20440600 | 1.52328600 |
| H | -5.30201500 | 2.23764900 | 4.00980300 |

## INT2-A

Cartesian coordinates

| ATOM | X           | Y           | Z           |
|------|-------------|-------------|-------------|
| Rh   | 0.03414000  | -0.14065700 | -0.74294300 |
| C    | -0.11449600 | 1.53476500  | 0.31361900  |
| C    | -0.36280100 | 0.80374000  | -2.45644900 |
| O    | 0.52188000  | 0.87290500  | -3.27862600 |
| C    | -0.21511900 | 2.53200000  | 1.01990800  |
| C    | -0.76127900 | -4.31543800 | 3.02189700  |
| H    | -0.49232100 | -5.09017900 | 3.73048600  |
| C    | 0.17914300  | -3.34456300 | 2.66645500  |
| C    | -0.19551600 | -2.37640700 | 1.72247700  |
| C    | 1.55648300  | -3.22724600 | 3.32011900  |
| C    | 2.53588400  | -2.75287000 | 2.24665500  |
| C    | 2.09066400  | -1.81092600 | 1.30657600  |
| C    | 2.96528400  | -1.21193700 | 0.38086000  |
| C    | 4.30263600  | -1.63677800 | 0.37579600  |

|   |             |             |             |
|---|-------------|-------------|-------------|
| H | 4.98819100  | -1.21055800 | -0.34879800 |
| C | 4.75553300  | -2.60486300 | 1.26534400  |
| H | 5.79130600  | -2.93006900 | 1.23742300  |
| C | 3.87550100  | -3.14874500 | 2.19791200  |
| H | 4.24298500  | -3.88886800 | 2.89954800  |
| C | 1.47904500  | -2.13356600 | 4.42654400  |
| H | 1.17124200  | -1.16794100 | 4.01352300  |
| H | 2.45880300  | -2.00403600 | 4.90063100  |
| H | 0.75471000  | -2.42397600 | 5.19627500  |
| C | 2.00398100  | -4.54555800 | 3.97521000  |
| H | 1.30335500  | -4.84543500 | 4.75996500  |
| H | 2.97583200  | -4.42473400 | 4.46242300  |
| H | 2.07904600  | -5.35962100 | 3.24656700  |
| C | -3.40537800 | -1.63808100 | -0.94203600 |
| C | -4.71100600 | -1.83808800 | -0.45588300 |
| H | -4.96900900 | -1.54226500 | 0.55555800  |
| C | -5.69344400 | -2.40223400 | -1.26999100 |
| H | -6.69612100 | -2.54987000 | -0.87753100 |
| C | -5.38943000 | -2.77038900 | -2.58206500 |
| H | -6.15559800 | -3.20772700 | -3.21695300 |
| C | -4.09905600 | -2.57251600 | -3.07328300 |
| H | -3.85278100 | -2.85730600 | -4.09248600 |
| C | -3.11130900 | -2.00976100 | -2.26295600 |
| H | -2.10485600 | -1.88758300 | -2.64412300 |
| C | -3.00055600 | 0.15334000  | 1.30722200  |

|   |             |             |             |
|---|-------------|-------------|-------------|
| C | -4.05904100 | 0.96679400  | 0.87053300  |
| H | -4.36779500 | 0.94649800  | -0.16863000 |
| C | -4.73366800 | 1.79782900  | 1.76677700  |
| H | -5.55976300 | 2.40904800  | 1.41227100  |
| C | -4.35415200 | 1.84037400  | 3.10938500  |
| H | -4.87908400 | 2.48753000  | 3.80674600  |
| C | -3.29269600 | 1.04837800  | 3.54912000  |
| H | -2.98338600 | 1.07905100  | 4.59018000  |
| C | -2.62206800 | 0.21173300  | 2.65688600  |
| H | -1.80269500 | -0.39913500 | 3.02017400  |
| C | 3.45722300  | -0.17766600 | -2.30801700 |
| C | 4.69968700  | 0.46520800  | -2.44898300 |
| H | 5.04982700  | 1.15379500  | -1.68751400 |
| C | 5.49401500  | 0.23272400  | -3.57311500 |
| H | 6.45179600  | 0.73802600  | -3.66651900 |
| C | 5.05578400  | -0.63686400 | -4.57246300 |
| H | 5.67247300  | -0.81465400 | -5.44981000 |
| C | 3.81917000  | -1.27116300 | -4.44209500 |
| H | 3.46648400  | -1.94416200 | -5.21905200 |
| C | 3.01978900  | -1.04456100 | -3.32142200 |
| H | 2.05993400  | -1.53788400 | -3.22944200 |
| C | 3.11415700  | 1.66326900  | -0.13950500 |
| C | 2.82067900  | 2.84449700  | -0.84240900 |
| H | 2.17059600  | 2.80876000  | -1.71176600 |
| C | 3.36010200  | 4.06110000  | -0.43146500 |

|    |             |             |             |
|----|-------------|-------------|-------------|
| H  | 3.12639000  | 4.96680400  | -0.98403600 |
| C  | 4.18953600  | 4.11864300  | 0.69280900  |
| H  | 4.60827900  | 5.06911000  | 1.01266000  |
| C  | 4.47006700  | 2.95353300  | 1.40634500  |
| H  | 5.10970000  | 2.99042000  | 2.28443800  |
| C  | 3.93462300  | 1.72912700  | 0.99307800  |
| H  | 4.16661200  | 0.82879800  | 1.55228900  |
| O  | 0.74670700  | -1.43980900 | 1.29943900  |
| P  | -2.07284900 | -0.91221100 | 0.11291800  |
| P  | 2.41490400  | 0.09391800  | -0.80556400 |
| Cl | 0.24492100  | -2.39676200 | -1.79387100 |
| C  | -1.50401900 | -2.29971200 | 1.21010400  |
| H  | -3.42309200 | -3.27180300 | 1.21009700  |
| C  | -2.04680900 | -4.29977300 | 2.48757700  |
| C  | -2.41558100 | -3.28707300 | 1.60880800  |
| H  | -2.76402800 | -5.06587100 | 2.76694000  |
| C  | -0.32918700 | 3.68889300  | 1.85077300  |
| C  | 0.79471100  | 4.21473700  | 2.52287100  |
| C  | -1.56990300 | 4.33916400  | 2.02207400  |
| C  | 0.67807500  | 5.34434700  | 3.33006800  |
| H  | 1.75556400  | 3.72655000  | 2.39876800  |
| C  | -1.67805500 | 5.47081300  | 2.82709700  |
| H  | -2.44570400 | 3.93820800  | 1.52161800  |
| C  | -0.55611000 | 5.98077200  | 3.48579600  |
| H  | 1.55744500  | 5.73249300  | 3.83872000  |



|   |             |            |             |
|---|-------------|------------|-------------|
| H | -2.64396300 | 5.95696000 | 2.94261000  |
| H | -0.64298800 | 6.86369000 | 4.11379500  |
| C | -1.72685700 | 1.34441300 | -2.79842700 |
| C | -2.47473800 | 2.14069400 | -1.92539600 |
| C | -2.19673900 | 1.10925500 | -4.10191400 |
| C | -3.67947300 | 2.70145600 | -2.35762900 |
| H | -2.09236300 | 2.34124600 | -0.93039300 |
| C | -3.41716200 | 1.63930900 | -4.51280800 |
| H | -1.59438300 | 0.51413900 | -4.78097600 |
| C | -4.15958100 | 2.44315100 | -3.64248600 |
| H | -4.24260300 | 3.34311900 | -1.68465000 |
| H | -3.78277700 | 1.43872900 | -5.51644200 |
| H | -5.10399300 | 2.87118000 | -3.96853400 |

## TS2-A

Cartesian coordinates

| ATOM | X           | Y           | Z           |
|------|-------------|-------------|-------------|
| Rh   | 0.75234500  | -0.46559200 | -1.27373800 |
| C    | 0.65825600  | -0.64427400 | -3.14753400 |
| O    | 0.39186000  | -0.96842700 | -4.23159000 |
| C    | 2.05440300  | 0.62320000  | -2.81077400 |
| C    | -2.79324300 | 1.82021100  | 3.07124100  |
| C    | -3.22628800 | 0.81670000  | 1.99203200  |
| C    | -2.24618900 | 0.02001800  | 1.38942300  |
| C    | -2.52053400 | -0.93939600 | 0.40677400  |

|   |             |             |             |
|---|-------------|-------------|-------------|
| C | -3.86486700 | -1.14646600 | 0.06803600  |
| H | -4.12617500 | -1.88890600 | -0.67665500 |
| C | -4.86962200 | -0.38560900 | 0.66385100  |
| H | -5.90657200 | -0.55141300 | 0.38645400  |
| C | -4.55103700 | 0.59640100  | 1.60213100  |
| H | -5.34910300 | 1.18907000  | 2.03606400  |
| C | -2.72320800 | 1.07404500  | 4.43460800  |
| H | -2.01620800 | 0.23939000  | 4.39309600  |
| H | -3.70908600 | 0.67634100  | 4.70223400  |
| H | -2.39689500 | 1.75813900  | 5.22655700  |
| C | -3.78735300 | 2.98953100  | 3.19124700  |
| H | -3.48114800 | 3.67689300  | 3.98578200  |
| H | -4.78379100 | 2.62873000  | 3.46369700  |
| H | -3.86303600 | 3.55055000  | 2.25419500  |
| C | 3.44165300  | 1.16666200  | 0.69260400  |
| C | 3.52992500  | 2.28257500  | -0.15746000 |
| H | 2.63784600  | 2.67140200  | -0.63800400 |
| C | 4.75884000  | 2.89607700  | -0.39775400 |
| H | 4.80607400  | 3.75927900  | -1.05575200 |
| C | 5.92256300  | 2.39146900  | 0.18724700  |
| H | 6.88122700  | 2.86565100  | -0.00624100 |
| C | 5.84819800  | 1.27069800  | 1.01424700  |
| H | 6.74885800  | 0.86591600  | 1.46837100  |
| C | 4.61666900  | 0.66307300  | 1.26944400  |
| H | 4.57472700  | -0.20397000 | 1.91941300  |

|   |             |             |             |
|---|-------------|-------------|-------------|
| C | 2.11661900  | -0.76238600 | 2.39622700  |
| C | 2.15689900  | -0.27601600 | 3.71454800  |
| H | 1.97228200  | 0.77470400  | 3.91375600  |
| C | 2.43521900  | -1.13384500 | 4.77826600  |
| H | 2.46171200  | -0.74201400 | 5.79194900  |
| C | 2.68031000  | -2.48858200 | 4.54132500  |
| H | 2.89666600  | -3.15672300 | 5.37114300  |
| C | 2.64663900  | -2.97771200 | 3.23570300  |
| H | 2.83120500  | -4.03018300 | 3.04008100  |
| C | 2.36509200  | -2.12311000 | 2.16637300  |
| H | 2.34584700  | -2.51045300 | 1.15388400  |
| C | -2.01315300 | -2.57319100 | -1.87856700 |
| C | -2.33570500 | -3.93429600 | -1.97276200 |
| H | -2.05329700 | -4.62008000 | -1.18231300 |
| C | -3.02767200 | -4.42163900 | -3.08474900 |
| H | -3.26407200 | -5.48068300 | -3.14481600 |
| C | -3.41546500 | -3.55703200 | -4.10777400 |
| H | -3.95211600 | -3.93900700 | -4.97208200 |
| C | -3.10978800 | -2.19704300 | -4.01561600 |
| H | -3.40650700 | -1.51483700 | -4.80751300 |
| C | -2.41038300 | -1.70856200 | -2.91358700 |
| H | -2.17893600 | -0.64946000 | -2.84931200 |
| C | -0.80878000 | -3.26480500 | 0.69401800  |
| C | 0.03973000  | -4.30519200 | 0.27434000  |
| H | 0.53167700  | -4.24790600 | -0.68913400 |

|    |             |             |             |
|----|-------------|-------------|-------------|
| C  | 0.27006200  | -5.40448000 | 1.10189900  |
| H  | 0.92307800  | -6.20229200 | 0.75829100  |
| C  | -0.32539400 | -5.47654800 | 2.36321200  |
| H  | -0.14134400 | -6.33278400 | 3.00694300  |
| C  | -1.15768300 | -4.44260000 | 2.79205800  |
| H  | -1.62516200 | -4.48671600 | 3.77208900  |
| C  | -1.40240300 | -3.34657300 | 1.96299500  |
| H  | -2.06443200 | -2.56074200 | 2.30832900  |
| O  | -0.93004100 | 0.15308300  | 1.76328600  |
| P  | 1.79543700  | 0.37473000  | 0.96679600  |
| P  | -1.12960300 | -1.83428200 | -0.42991900 |
| C  | 0.82934000  | 1.71399900  | 1.79922200  |
| H  | 2.33583100  | 3.24876300  | 1.95095900  |
| C  | 0.45523600  | 3.90616000  | 2.76585200  |
| C  | 1.30539300  | 2.98075100  | 2.15595000  |
| H  | 0.83344000  | 4.88856500  | 3.03436500  |
| C  | -0.87282500 | 3.57651400  | 3.04204300  |
| H  | -1.51022500 | 4.31261800  | 3.52029300  |
| C  | -1.38214300 | 2.31260400  | 2.72155100  |
| C  | -0.50538900 | 1.41980400  | 2.10147400  |
| C  | -1.35432500 | 1.96203200  | -1.32200700 |
| Cl | 2.29689600  | -2.43278200 | -1.33193200 |
| C  | -2.30441500 | 3.03007700  | -1.33661500 |
| C  | -2.05563800 | 4.23055600  | -0.63784200 |
| C  | -3.51824200 | 2.91077600  | -2.04530300 |

|   |             |             |             |
|---|-------------|-------------|-------------|
| C | -2.98773000 | 5.26678400  | -0.64959900 |
| H | -1.12678100 | 4.33345600  | -0.08544700 |
| C | -4.44482300 | 3.95086100  | -2.05371500 |
| H | -3.72335200 | 1.99037600  | -2.58385000 |
| C | -4.18610900 | 5.13401400  | -1.35667000 |
| H | -2.77560800 | 6.18492400  | -0.10701600 |
| H | -5.37367400 | 3.83756000  | -2.60727300 |
| H | -4.90968400 | 5.94485600  | -1.36610000 |
| C | -0.53865700 | 1.04960500  | -1.27652000 |
| C | 3.36212600  | 0.16502300  | -3.02994900 |
| C | 1.68778000  | 1.90964000  | -3.24131300 |
| C | 4.29452100  | 0.99463400  | -3.65583600 |
| H | 3.64086000  | -0.83259100 | -2.71206800 |
| C | 2.62587100  | 2.73217300  | -3.86574700 |
| H | 0.67282200  | 2.25952800  | -3.08978600 |
| C | 3.93078000  | 2.27644700  | -4.07378200 |
| H | 5.30768000  | 0.63499800  | -3.81641100 |
| H | 2.33367600  | 3.72575700  | -4.19701300 |
| H | 4.65851700  | 2.91575600  | -4.56759800 |

### INT3-A

Cartesian coordinates

| ATOM | X           | Y          | Z           |
|------|-------------|------------|-------------|
| Rh   | -0.78068800 | 0.50883700 | -1.35331200 |
| C    | -0.26880600 | 0.87871100 | -3.14704400 |

|   |             |             |             |
|---|-------------|-------------|-------------|
| O | -0.05074300 | 1.08274500  | -4.24997200 |
| C | -2.35570900 | -0.44264200 | -2.41480600 |
| C | 2.41970600  | -2.28173800 | 3.05545700  |
| C | 3.03901500  | -1.32646100 | 2.02602800  |
| C | 2.21666800  | -0.38306300 | 1.39942000  |
| C | 2.68300700  | 0.55994400  | 0.47488400  |
| C | 4.06133800  | 0.58464700  | 0.21886600  |
| H | 4.46641000  | 1.30786300  | -0.47966700 |
| C | 4.91242500  | -0.33001700 | 0.83609300  |
| H | 5.97731200  | -0.30547300 | 0.62364500  |
| C | 4.40232500  | -1.28382600 | 1.71741900  |
| H | 5.08277500  | -1.99411100 | 2.17459900  |
| C | 2.43365600  | -1.57884300 | 4.44382600  |
| H | 1.87315700  | -0.63870600 | 4.41788700  |
| H | 3.46292900  | -1.35509900 | 4.74754400  |
| H | 1.97932100  | -2.22575900 | 5.20339100  |
| C | 3.21222300  | -3.59905800 | 3.15276700  |
| H | 2.78004200  | -4.25694800 | 3.91273900  |
| H | 4.24477200  | -3.41119500 | 3.46140000  |
| H | 3.22428000  | -4.13107900 | 2.19609100  |
| C | -3.65204500 | -0.57962700 | 0.73001400  |
| C | -4.03785000 | -1.72049000 | 0.00484700  |
| H | -3.29041400 | -2.33023600 | -0.49024800 |
| C | -5.38317300 | -2.06828500 | -0.10616400 |
| H | -5.66085200 | -2.95286600 | -0.67207700 |

|   |             |             |             |
|---|-------------|-------------|-------------|
| C | -6.36634500 | -1.27117400 | 0.48406000  |
| H | -7.41550600 | -1.53854100 | 0.38946600  |
| C | -5.99524100 | -0.12471600 | 1.18601300  |
| H | -6.75279100 | 0.50704500  | 1.64201000  |
| C | -4.64739000 | 0.21867000  | 1.31293700  |
| H | -4.37645600 | 1.10976700  | 1.86754800  |
| C | -1.86667300 | 1.09939200  | 2.25379200  |
| C | -1.90533100 | 0.65886700  | 3.58843000  |
| H | -1.89316200 | -0.40218800 | 3.81412800  |
| C | -1.96500400 | 1.57774400  | 4.63527400  |
| H | -1.99275800 | 1.22091300  | 5.66165200  |
| C | -1.99120300 | 2.94825800  | 4.36577700  |
| H | -2.03634800 | 3.66392200  | 5.18269500  |
| C | -1.96049500 | 3.39152600  | 3.04441500  |
| H | -1.97476900 | 4.45461100  | 2.82277600  |
| C | -1.89791900 | 2.47545500  | 1.99056600  |
| H | -1.88184500 | 2.83015400  | 0.96613600  |
| C | 2.48953600  | 2.19873900  | -1.84341700 |
| C | 2.90745600  | 3.51794000  | -2.06325000 |
| H | 2.65453200  | 4.29649600  | -1.35233800 |
| C | 3.65684600  | 3.84420700  | -3.19739700 |
| H | 3.96854300  | 4.87355700  | -3.35353900 |
| C | 4.00658600  | 2.85856600  | -4.11946900 |
| H | 4.58956700  | 3.11499500  | -4.99991400 |
| C | 3.60156200  | 1.53854800  | -3.90482900 |

|   |             |             |             |
|---|-------------|-------------|-------------|
| H | 3.86818100  | 0.76249300  | -4.61733700 |
| C | 2.84570900  | 1.21126600  | -2.78058000 |
| H | 2.53397200  | 0.18157900  | -2.62308400 |
| C | 1.43639400  | 3.16744300  | 0.69748000  |
| C | 0.67583600  | 4.28150500  | 0.29882700  |
| H | 0.08700000  | 4.23642300  | -0.61096300 |
| C | 0.65379300  | 5.43734200  | 1.08069200  |
| H | 0.06806200  | 6.29210700  | 0.75263100  |
| C | 1.36946600  | 5.49304000  | 2.27874700  |
| H | 1.34753800  | 6.39291100  | 2.88800600  |
| C | 2.11128000  | 4.38526300  | 2.69021700  |
| H | 2.66895700  | 4.41642200  | 3.62259200  |
| C | 2.14990500  | 3.23214000  | 1.90409600  |
| H | 2.74244500  | 2.38556800  | 2.23332500  |
| O | 0.87329900  | -0.33457600 | 1.68777500  |
| P | -1.86627300 | -0.12569100 | 0.86238400  |
| P | 1.47314500  | 1.66822200  | -0.38410700 |
| C | -1.11051900 | -1.59695000 | 1.69297400  |
| H | -2.85187200 | -2.85875100 | 1.85377100  |
| C | -1.11613400 | -3.80489400 | 2.69576800  |
| C | -1.79306300 | -2.76163500 | 2.06102500  |
| H | -1.65554400 | -4.70639500 | 2.97185700  |
| C | 0.24269700  | -3.69227000 | 2.98863500  |
| H | 0.74304800  | -4.51404200 | 3.48952100  |
| C | 0.95765100  | -2.53338800 | 2.66345800  |



|    |             |             |             |
|----|-------------|-------------|-------------|
| C  | 0.25141600  | -1.51645600 | 2.01588800  |
| C  | 0.98112100  | -2.17905300 | -1.37462400 |
| Cl | -1.87912000 | 2.76613700  | -1.47986000 |
| C  | 1.77782300  | -3.36590000 | -1.39188400 |
| C  | 1.39642300  | -4.50248700 | -0.64741800 |
| C  | 2.96243200  | -3.43648100 | -2.15403700 |
| C  | 2.17302100  | -5.65970900 | -0.66654900 |
| H  | 0.48597500  | -4.46192400 | -0.05787200 |
| C  | 3.73386900  | -4.59634800 | -2.16894100 |
| H  | 3.26805200  | -2.57024000 | -2.73339300 |
| C  | 3.34527400  | -5.71385400 | -1.42576400 |
| H  | 1.85837600  | -6.52599500 | -0.08956200 |
| H  | 4.64274900  | -4.62856900 | -2.76465100 |
| H  | 3.94745000  | -6.61840100 | -1.44088000 |
| C  | 0.28281700  | -1.17452600 | -1.33112500 |
| C  | -3.57042600 | 0.22778700  | -2.60706200 |
| C  | -2.18408800 | -1.70591100 | -2.99905600 |
| C  | -4.59948700 | -0.36703100 | -3.34458800 |
| H  | -3.72261600 | 1.21422600  | -2.18841400 |
| C  | -3.22020300 | -2.29801900 | -3.73082600 |
| H  | -1.24859700 | -2.23953400 | -2.88493500 |
| C  | -4.43317200 | -1.63245600 | -3.90750600 |
| H  | -5.53515700 | 0.17187000  | -3.47589500 |
| H  | -3.06446700 | -3.28095700 | -4.17062000 |
| H  | -5.23384800 | -2.08935200 | -4.48412400 |

## INT4-A

Cartesian coordinates

| ATOM | X           | Y           | Z           |
|------|-------------|-------------|-------------|
| Rh   | -0.60203300 | 0.98838100  | 0.03166500  |
| C    | -0.56707900 | 0.54680300  | -1.78643600 |
| O    | -0.61862300 | 0.27272400  | -2.89969100 |
| C    | -0.66204200 | 2.99852600  | -0.54201500 |
| C    | -3.79094200 | 1.17774600  | -0.33342400 |
| C    | -0.85913500 | -3.91153500 | -1.37498400 |
| C    | 2.52606200  | -0.65105100 | -1.73060600 |
| C    | 3.03113000  | -1.15076600 | -2.93399000 |
| C    | 3.71676400  | -0.24671500 | -3.75454300 |
| H    | 4.11822100  | -0.57682300 | -4.70659700 |
| C    | 3.89879700  | 1.08115800  | -3.36595000 |
| C    | 3.42524400  | 1.53179400  | -2.13225200 |
| C    | 2.73243100  | 0.66225900  | -1.27998600 |
| H    | -0.95708200 | -5.42066100 | -2.90395900 |
| H    | 1.11443600  | -4.69700400 | -4.02396000 |
| H    | -1.78978800 | -4.22147900 | -0.91449400 |
| H    | 4.42602200  | 1.76702200  | -4.02260100 |
| H    | 3.58800300  | 2.56158500  | -1.83484700 |
| O    | 1.77607100  | -1.45535300 | -0.89834000 |
| C    | 2.87970100  | -2.65170200 | -3.21469700 |
| C    | 2.98134400  | -2.96461200 | -4.71849500 |

|   |             |             |             |
|---|-------------|-------------|-------------|
| H | 2.90713200  | -4.04104300 | -4.89859200 |
| H | 2.19434600  | -2.46263900 | -5.29091100 |
| H | 3.95212500  | -2.65200600 | -5.11480800 |
| C | 4.02440700  | -3.39838200 | -2.47009800 |
| H | 3.98857800  | -3.20631300 | -1.39299100 |
| H | 3.93731000  | -4.47972300 | -2.62644100 |
| H | 5.00068500  | -3.06948700 | -2.84477700 |
| P | -0.81209300 | -1.76214500 | 0.53709000  |
| P | 1.95866300  | 1.12387300  | 0.33319200  |
| C | -2.56270600 | -2.35941500 | 0.62394200  |
| C | -3.06085300 | -3.10851700 | 1.70009200  |
| C | -3.42666700 | -2.05383100 | -0.44187300 |
| C | -4.39013500 | -3.53879200 | 1.71044700  |
| H | -2.41711800 | -3.36194600 | 2.53427300  |
| C | -4.74980300 | -2.49252800 | -0.43353400 |
| H | -3.07111500 | -1.46482900 | -1.27922000 |
| C | -5.23698600 | -3.23381000 | 0.64538300  |
| H | -4.75807400 | -4.11643400 | 2.55439600  |
| H | -5.40321900 | -2.23798700 | -1.26285100 |
| H | -6.27137400 | -3.56691300 | 0.65558900  |
| C | -0.06432300 | -2.48265900 | 2.06009300  |
| C | -0.38663000 | -1.89237900 | 3.29489000  |
| C | 0.74890000  | -3.62458800 | 2.04016300  |
| C | 0.07174900  | -2.45974500 | 4.48428000  |
| H | -0.98761700 | -0.98853100 | 3.32187200  |

|   |             |             |            |
|---|-------------|-------------|------------|
| C | 1.22255400  | -4.17462700 | 3.23287900 |
| H | 1.00538200  | -4.09481400 | 1.09631500 |
| C | 0.87699000  | -3.60064500 | 4.45707100 |
| H | -0.19559900 | -2.00163700 | 5.43293900 |
| H | 1.85344300  | -5.05916500 | 3.20271600 |
| H | 1.23599900  | -4.03824100 | 5.38502300 |
| C | 2.85450500  | 0.05744600  | 1.55715800 |
| C | 2.41447400  | 0.07579400  | 2.88887600 |
| C | 4.02047000  | -0.65209500 | 1.23286800 |
| C | 3.13446000  | -0.60066700 | 3.87454400 |
| H | 1.50923100  | 0.61540700  | 3.14883800 |
| C | 4.73286400  | -1.33146500 | 2.22216100 |
| H | 4.38655900  | -0.67052300 | 0.21146300 |
| C | 4.29337200  | -1.30516200 | 3.54643900 |
| H | 2.78068800  | -0.58005800 | 4.90125300 |
| H | 5.63500500  | -1.87630200 | 1.95544900 |
| H | 4.85127100  | -1.83022500 | 4.31737800 |
| C | 2.71553800  | 2.75268900  | 0.78054400 |
| C | 1.92626700  | 3.77416900  | 1.32461900 |
| C | 4.10827800  | 2.93660100  | 0.70181500 |
| C | 2.51481800  | 4.96844900  | 1.74899800 |
| H | 0.85861000  | 3.63475200  | 1.43000000 |
| C | 4.68957400  | 4.13355500  | 1.11595800 |
| H | 4.74515000  | 2.13946200  | 0.33040600 |
| C | 3.89153500  | 5.15575200  | 1.63716800 |

|    |             |             |             |
|----|-------------|-------------|-------------|
| H  | 1.88713500  | 5.75052000  | 2.16674800  |
| H  | 5.76623600  | 4.26279300  | 1.04244600  |
| H  | 4.34545900  | 6.08759900  | 1.96427400  |
| C  | -0.39381700 | -4.58216300 | -2.50479100 |
| Cl | -0.85628100 | 1.54440500  | 2.39577000  |
| C  | 0.78224700  | -4.17402400 | -3.13389600 |
| C  | 1.53842800  | -3.11241300 | -2.62665500 |
| C  | 1.05496300  | -2.47945400 | -1.47490200 |
| C  | -0.15329800 | -2.82003200 | -0.84561000 |
| C  | -5.20613700 | 1.29573200  | -0.47916400 |
| C  | -5.77543900 | 1.70671300  | -1.70252400 |
| C  | -6.07077100 | 1.00005500  | 0.59552200  |
| C  | -7.15710200 | 1.81811900  | -1.84259200 |
| H  | -5.11792300 | 1.94089000  | -2.53470000 |
| C  | -7.45129700 | 1.11517100  | 0.44858500  |
| H  | -5.64086500 | 0.68238500  | 1.54035700  |
| C  | -8.00208100 | 1.52346100  | -0.76925800 |
| H  | -7.57632700 | 2.13884200  | -2.79313500 |
| H  | -8.10115100 | 0.88558300  | 1.28950400  |
| H  | -9.07959500 | 1.61290400  | -0.88034500 |
| C  | -2.58585500 | 1.05524400  | -0.17737300 |
| C  | 0.10792600  | 3.46799600  | -1.61273900 |
| C  | -1.49515300 | 3.89618200  | 0.13762100  |
| C  | 0.07306700  | 4.81918300  | -1.97978200 |
| H  | 0.76064700  | 2.80117400  | -2.16886900 |

|   |             |            |             |
|---|-------------|------------|-------------|
| C | -1.52221500 | 5.24468000 | -0.22974200 |
| H | -2.11128100 | 3.55049700 | 0.95749000  |
| C | -0.73946400 | 5.71398500 | -1.28710500 |
| H | 0.68620000  | 5.16237300 | -2.81014800 |
| H | -2.16976800 | 5.92826600 | 0.31480800  |
| H | -0.76944600 | 6.76289900 | -1.57087900 |

### TS3-A

Cartesian coordinates

| ATOM | X           | Y           | Z           |
|------|-------------|-------------|-------------|
| Rh   | -0.73199000 | 0.78565800  | 0.04913000  |
| C    | -2.71012500 | 0.98703100  | -0.23479500 |
| C    | -3.92203100 | 0.80741400  | -0.34316000 |
| C    | -1.74514900 | 2.67123500  | -0.42712500 |
| C    | 3.50305900  | -2.22601700 | -3.07353300 |
| C    | 3.47505600  | -0.72496500 | -2.75525000 |
| C    | 2.79473800  | -0.30228600 | -1.60944700 |
| C    | 2.77918100  | 1.02513600  | -1.15508100 |
| C    | 3.49066000  | 1.96978900  | -1.90535300 |
| H    | 3.50916500  | 3.00590100  | -1.58654400 |
| C    | 4.16228700  | 1.58797300  | -3.06752800 |
| H    | 4.70272900  | 2.33163600  | -3.64605600 |
| C    | 4.15355800  | 0.25716900  | -3.48667600 |
| H    | 4.69167200  | -0.01467000 | -4.38834100 |
| C    | 4.64741700  | -2.87618800 | -2.24288000 |

|   |             |             |             |
|---|-------------|-------------|-------------|
| H | 4.50414100  | -2.70801200 | -1.17077300 |
| H | 5.61572700  | -2.44943800 | -2.52918700 |
| H | 4.67748700  | -3.95781200 | -2.41839700 |
| C | 3.76723600  | -2.48801200 | -4.56704700 |
| H | 3.82181700  | -3.56168800 | -4.76943600 |
| H | 4.73040700  | -2.06697500 | -4.87016700 |
| H | 2.98488200  | -2.05501800 | -5.19910300 |
| C | -2.08142300 | -2.76984200 | 0.56837400  |
| C | -3.07459400 | -2.40753400 | -0.35649400 |
| H | -2.88579000 | -1.61687700 | -1.07258200 |
| C | -4.31698100 | -3.04271600 | -0.35169800 |
| H | -5.07714300 | -2.73543900 | -1.06401000 |
| C | -4.58744800 | -4.04571200 | 0.58040900  |
| H | -5.55836900 | -4.53396700 | 0.59034700  |
| C | -3.60738100 | -4.41438200 | 1.50353700  |
| H | -3.80849300 | -5.19634500 | 2.23123000  |
| C | -2.36210400 | -3.78323500 | 1.49894600  |
| H | -1.61143500 | -4.08361000 | 2.22125100  |
| C | 0.44500200  | -2.54256000 | 1.95870200  |
| C | 1.55161200  | -3.39916300 | 1.86683900  |
| H | 1.92572500  | -3.70629700 | 0.89603400  |
| C | 2.17273800  | -3.88059500 | 3.02096200  |
| H | 3.02867500  | -4.54452100 | 2.93164600  |
| C | 1.69182900  | -3.52091900 | 4.28016000  |
| H | 2.17110000  | -3.90379500 | 5.17746800  |

|   |             |             |             |
|---|-------------|-------------|-------------|
| C | 0.59176200  | -2.66623500 | 4.38082500  |
| H | 0.21138400  | -2.37728200 | 5.35711600  |
| C | -0.02347200 | -2.17008600 | 3.23158200  |
| H | -0.86219900 | -1.48809600 | 3.31962500  |
| C | 2.06489200  | 3.22572600  | 0.56907800  |
| C | 2.92070000  | 3.74675400  | 1.55225700  |
| H | 3.44219800  | 3.08042600  | 2.22995200  |
| C | 3.10892800  | 5.12525700  | 1.66803500  |
| H | 3.77203000  | 5.51189800  | 2.43751200  |
| C | 2.45306900  | 6.00078500  | 0.80167000  |
| H | 2.60076400  | 7.07360200  | 0.89428400  |
| C | 1.60011000  | 5.49181300  | -0.17930900 |
| H | 1.07071400  | 6.16210000  | -0.85007200 |
| C | 1.39914600  | 4.11562600  | -0.28993900 |
| H | 0.71405000  | 3.73884500  | -1.04158400 |
| C | 2.82876600  | 0.68356000  | 1.70519700  |
| C | 2.30272600  | 0.59655200  | 3.00396600  |
| H | 1.27490500  | 0.88953000  | 3.19012100  |
| C | 3.09558100  | 0.12654100  | 4.05273000  |
| H | 2.67343500  | 0.06265300  | 5.05168700  |
| C | 4.41385000  | -0.26806900 | 3.82162700  |
| H | 5.02653900  | -0.63619500 | 4.64054000  |
| C | 4.94218800  | -0.18766300 | 2.53203900  |
| H | 5.96884800  | -0.48979200 | 2.34127300  |
| C | 4.15755600  | 0.28861200  | 1.48100800  |



|    |             |             |             |
|----|-------------|-------------|-------------|
| H  | 4.58938800  | 0.36138200  | 0.48844200  |
| O  | 2.09105400  | -1.20779200 | -0.84305100 |
| P  | -0.44969700 | -1.90693200 | 0.47469200  |
| P  | 1.78552100  | 1.41040200  | 0.36088900  |
| C  | 0.35410300  | -2.80389000 | -0.93841200 |
| H  | -1.11952500 | -4.35928100 | -1.16172900 |
| C  | 0.39272200  | -4.49357400 | -2.68329300 |
| C  | -0.20476700 | -3.93188700 | -1.55591200 |
| H  | -0.05640700 | -5.36290000 | -3.15487300 |
| C  | 1.56222600  | -3.94574600 | -3.21148100 |
| H  | 2.00388700  | -4.39880000 | -4.09278100 |
| C  | 2.17046000  | -2.83524000 | -2.61602100 |
| C  | 1.54286800  | -2.29795300 | -1.48611900 |
| C  | -0.44564600 | 0.42683700  | -1.74888800 |
| Cl | -1.14305300 | 1.04024600  | 2.45008500  |
| C  | -5.32521400 | 0.63254500  | -0.45106300 |
| C  | -5.94060500 | 0.44985300  | -1.71050600 |
| C  | -6.14349700 | 0.63172000  | 0.70144900  |
| C  | -7.31811100 | 0.27202400  | -1.80853900 |
| H  | -5.32206800 | 0.45455500  | -2.60344600 |
| C  | -7.51973000 | 0.45642200  | 0.59226500  |
| H  | -5.67802600 | 0.76921600  | 1.67247000  |
| C  | -8.11509700 | 0.27451100  | -0.65997000 |
| H  | -7.77345500 | 0.13458700  | -2.78620700 |
| H  | -8.13303200 | 0.46017000  | 1.48982800  |

|   |             |            |             |
|---|-------------|------------|-------------|
| H | -9.19014300 | 0.13732800 | -0.74010100 |
| O | -0.29363400 | 0.15471100 | -2.85803100 |
| C | -1.80075500 | 3.12938000 | -1.76067900 |
| C | -1.93639400 | 3.60521000 | 0.60703000  |
| C | -2.02611600 | 4.47588900 | -2.04533500 |
| H | -1.70869600 | 2.43259600 | -2.58674400 |
| C | -2.16658500 | 4.94911100 | 0.31017800  |
| H | -1.91374200 | 3.27516300 | 1.63727400  |
| C | -2.20972400 | 5.39800100 | -1.01149900 |
| H | -2.06991200 | 4.79894000 | -3.08306500 |
| H | -2.31237000 | 5.65040200 | 1.12855600  |
| H | -2.39458800 | 6.44565900 | -1.23379200 |

## INT5-A

Cartesian coordinates

| ATOM | X           | Y           | Z           |
|------|-------------|-------------|-------------|
| Rh   | -0.98438000 | 0.37930800  | -0.05501400 |
| C    | -2.66664100 | 1.67825200  | -0.55053700 |
| C    | -3.10980000 | 0.49081600  | -0.53393200 |
| C    | -2.92790200 | 3.10039100  | -0.60516800 |
| O    | -0.36765800 | 0.12438400  | -2.97958600 |
| C    | 0.79362400  | -3.99716800 | -1.56909000 |
| C    | 2.83370700  | 0.23690200  | -1.43176200 |
| C    | 3.70798600  | -0.01809600 | -2.49304300 |
| C    | 4.19633900  | 1.09050200  | -3.19375600 |

|   |             |             |             |
|---|-------------|-------------|-------------|
| H | 4.87021700  | 0.94876000  | -4.03195400 |
| C | 3.83963400  | 2.38683800  | -2.82153300 |
| C | 2.98441900  | 2.60417300  | -1.74053000 |
| C | 2.45014300  | 1.52344300  | -1.02665500 |
| H | 1.43865900  | -5.35912700 | -3.10311100 |
| H | 3.30040500  | -3.93619000 | -3.85943700 |
| H | -0.02771800 | -4.63193300 | -1.25856400 |
| H | 4.23763400  | 3.23456000  | -3.37198600 |
| H | 2.72197900  | 3.61722000  | -1.45813200 |
| O | 2.30221200  | -0.80824300 | -0.70489200 |
| C | 4.13225700  | -1.46974300 | -2.74876800 |
| C | 4.62333300  | -1.67806900 | -4.19196200 |
| H | 4.95275200  | -2.71006700 | -4.34510700 |
| H | 3.84040400  | -1.45156700 | -4.92332800 |
| H | 5.48858300  | -1.04259500 | -4.40269400 |
| C | 5.29368200  | -1.81378200 | -1.77141000 |
| H | 4.98953500  | -1.67276300 | -0.72952400 |
| H | 5.60266100  | -2.85763700 | -1.90012200 |
| H | 6.15789100  | -1.16761900 | -1.96456200 |
| P | -0.13492400 | -2.08434500 | 0.37672700  |
| P | 1.25594700  | 1.66642300  | 0.38743700  |
| C | -1.49503000 | -3.34003000 | 0.30527900  |
| C | -1.60558600 | -4.40613600 | 1.21023400  |
| C | -2.42017800 | -3.24927000 | -0.74645900 |
| C | -2.61972600 | -5.35596000 | 1.06538300  |

|   |             |             |             |
|---|-------------|-------------|-------------|
| H | -0.89920900 | -4.50057700 | 2.02735300  |
| C | -3.42251300 | -4.20624900 | -0.89929200 |
| H | -2.35967000 | -2.42282300 | -1.44728000 |
| C | -3.52722800 | -5.26122600 | 0.00978100  |
| H | -2.69375200 | -6.17322200 | 1.77824200  |
| H | -4.13403700 | -4.11080600 | -1.71384500 |
| H | -4.31502800 | -6.00168500 | -0.10151300 |
| C | 0.72685600  | -2.50772400 | 1.95573900  |
| C | 0.06984800  | -2.23219100 | 3.16827900  |
| C | 1.99183200  | -3.11221700 | 1.99150800  |
| C | 0.66211900  | -2.57588500 | 4.38373500  |
| H | -0.89443900 | -1.73536200 | 3.15997400  |
| C | 2.58707200  | -3.43855900 | 3.21173400  |
| H | 2.51380300  | -3.34140100 | 1.06836900  |
| C | 1.92213000  | -3.17799100 | 4.41019200  |
| H | 0.13756700  | -2.36403900 | 5.31186600  |
| H | 3.56873400  | -3.90514700 | 3.22148300  |
| H | 2.38302500  | -3.44120500 | 5.35877600  |
| C | 2.34494800  | 1.27382300  | 1.83283300  |
| C | 1.75214000  | 0.94266600  | 3.06070400  |
| C | 3.74527700  | 1.35324000  | 1.75088500  |
| C | 2.54853100  | 0.70153600  | 4.18256700  |
| H | 0.67169200  | 0.86972600  | 3.13341400  |
| C | 4.53556700  | 1.10373100  | 2.87327000  |
| H | 4.22342800  | 1.61585600  | 0.81268300  |

|    |             |             |             |
|----|-------------|-------------|-------------|
| C  | 3.93868100  | 0.77910000  | 4.09324400  |
| H  | 2.07525500  | 0.44203300  | 5.12532400  |
| H  | 5.61791300  | 1.16735900  | 2.79338600  |
| H  | 4.55497700  | 0.58646200  | 4.96778700  |
| C  | 1.05971000  | 3.50082000  | 0.51595900  |
| C  | 0.32585800  | 4.16625400  | -0.47955400 |
| C  | 1.62009400  | 4.25426100  | 1.55803400  |
| C  | 0.18184800  | 5.55268600  | -0.45205400 |
| H  | -0.14041400 | 3.59826600  | -1.27853800 |
| C  | 1.45828400  | 5.64131000  | 1.59445100  |
| H  | 2.18589900  | 3.76289500  | 2.34166200  |
| C  | 0.74675300  | 6.29444300  | 0.58787700  |
| H  | -0.39314000 | 6.04603300  | -1.22976400 |
| H  | 1.89546800  | 6.20958300  | 2.41140700  |
| H  | 0.62535200  | 7.37414000  | 0.61683000  |
| C  | 1.61971900  | -4.40586400 | -2.61478600 |
| Cl | -1.69440200 | 0.65472100  | 2.30377800  |
| C  | 2.67541900  | -3.59869600 | -3.03934300 |
| C  | 2.93951800  | -2.37534400 | -2.41529200 |
| C  | 2.08853700  | -1.99582500 | -1.36952500 |
| C  | 1.00079900  | -2.76521800 | -0.93053600 |
| C  | -4.24439400 | -0.40648600 | -0.57333900 |
| C  | -4.91614300 | -0.66107300 | -1.78371000 |
| C  | -4.72804900 | -0.99015200 | 0.61316000  |
| C  | -6.05256100 | -1.46915800 | -1.80342800 |

|   |             |             |             |
|---|-------------|-------------|-------------|
| H | -4.54713800 | -0.21040200 | -2.70086000 |
| C | -5.86748500 | -1.79057700 | 0.58531900  |
| H | -4.20172700 | -0.79298700 | 1.54185600  |
| C | -6.53347500 | -2.03451600 | -0.61948000 |
| H | -6.56814800 | -1.64941300 | -2.74346400 |
| H | -6.23740500 | -2.22786900 | 1.50898500  |
| H | -7.42270100 | -2.65936900 | -0.63547700 |
| C | -0.58752200 | 0.21900800  | -1.84890400 |
| C | -3.14418100 | 3.74780000  | -1.83599300 |
| C | -3.02992800 | 3.84380800  | 0.58642500  |
| C | -3.47147300 | 5.10300900  | -1.87227000 |
| H | -3.06697800 | 3.17742900  | -2.75758100 |
| C | -3.36416400 | 5.19522000  | 0.54107000  |
| H | -2.84895000 | 3.34042500  | 1.53095100  |
| C | -3.58712200 | 5.83018400  | -0.68446700 |
| H | -3.64668100 | 5.58853600  | -2.82909500 |
| H | -3.44992900 | 5.75658600  | 1.46772200  |
| H | -3.84994300 | 6.88446900  | -0.71388900 |

## TS1-B

Cartesian coordinates

| ATOM | X           | Y           | Z          |
|------|-------------|-------------|------------|
| Rh   | -0.06824300 | -0.39694200 | 0.07015800 |
| C    | 0.51534900  | -0.82633100 | 2.18528500 |
| C    | 0.85250000  | -2.06185400 | 0.83412000 |

|   |             |             |             |
|---|-------------|-------------|-------------|
| O | 0.22827500  | -3.12196100 | 0.94391500  |
| C | 3.41539800  | -2.28527300 | 0.13052000  |
| C | -1.49734100 | 4.93960500  | -1.72081700 |
| H | -2.12879700 | 5.74863200  | -2.07060800 |
| C | -2.07329900 | 3.79740600  | -1.16183400 |
| C | -1.22627200 | 2.75814200  | -0.74119000 |
| C | -3.57525500 | 3.63138400  | -0.92516800 |
| C | -3.91087200 | 2.17113500  | -1.23045900 |
| C | -3.00442100 | 1.18930700  | -0.79963800 |
| C | -3.28068900 | -0.18565900 | -0.91687800 |
| C | -4.47657500 | -0.55046800 | -1.55323400 |
| H | -4.70597000 | -1.60056900 | -1.68868200 |
| C | -5.36335000 | 0.40442300  | -2.03862200 |
| H | -6.27409400 | 0.09464800  | -2.54284300 |
| C | -5.08452800 | 1.75810000  | -1.86481400 |
| H | -5.79177300 | 2.49614300  | -2.22610200 |
| C | -3.87497900 | 3.90595700  | 0.57808000  |
| H | -3.30853000 | 3.23304600  | 1.22864300  |
| H | -4.94205000 | 3.76200900  | 0.78386100  |
| H | -3.60737200 | 4.93735900  | 0.83548500  |
| C | -4.41038900 | 4.61048200  | -1.76654200 |
| H | -4.16888200 | 5.64574900  | -1.50760100 |
| H | -5.47744700 | 4.48051800  | -1.56226100 |
| H | -4.24355400 | 4.47346500  | -2.84019100 |
| C | 2.82369800  | 1.62180500  | -1.21848300 |

|   |             |             |             |
|---|-------------|-------------|-------------|
| C | 3.76612300  | 2.66767900  | -1.21057900 |
| H | 3.66527700  | 3.49115600  | -0.51131600 |
| C | 4.85516800  | 2.65352400  | -2.08266900 |
| H | 5.56990700  | 3.47219100  | -2.06232400 |
| C | 5.02480500  | 1.59214400  | -2.97417000 |
| H | 5.87230600  | 1.58125100  | -3.65460000 |
| C | 4.10533300  | 0.54322100  | -2.98047200 |
| H | 4.23337400  | -0.29178100 | -3.66333800 |
| C | 3.01552900  | 0.55231000  | -2.10709600 |
| H | 2.29979000  | -0.25976100 | -2.12642400 |
| C | 1.92735800  | 2.49542600  | 1.40711600  |
| C | 3.24404800  | 2.37687800  | 1.88228600  |
| H | 3.96840200  | 1.78309700  | 1.33406400  |
| C | 3.64465700  | 3.02328600  | 3.05252400  |
| H | 4.67227100  | 2.92648500  | 3.39345200  |
| C | 2.73208900  | 3.78806000  | 3.78066400  |
| H | 3.04317300  | 4.29127100  | 4.69220100  |
| C | 1.41644600  | 3.90037700  | 3.32849900  |
| H | 0.69556400  | 4.49095400  | 3.88761500  |
| C | 1.01887300  | 3.26313600  | 2.15290100  |
| H | -0.00634200 | 3.37320800  | 1.81402200  |
| C | -2.26693600 | -2.95459200 | -1.33608100 |
| C | -3.40924600 | -3.77402600 | -1.37507600 |
| H | -4.25419100 | -3.56619700 | -0.72653500 |
| C | -3.46309300 | -4.88274400 | -2.22034600 |



|    |             |             |             |
|----|-------------|-------------|-------------|
| H  | -4.35628200 | -5.50183900 | -2.23853900 |
| C  | -2.36892500 | -5.20090600 | -3.02644100 |
| H  | -2.40741100 | -6.06767000 | -3.68129600 |
| C  | -1.22226500 | -4.40780500 | -2.97703400 |
| H  | -0.36046100 | -4.65470700 | -3.59110300 |
| C  | -1.16782400 | -3.29387500 | -2.13792500 |
| H  | -0.27813600 | -2.67862600 | -2.11428600 |
| C  | -3.17731000 | -2.09103100 | 1.22733000  |
| C  | -2.88002800 | -3.34285000 | 1.79926900  |
| H  | -2.07752800 | -3.94430700 | 1.38777200  |
| C  | -3.58931100 | -3.79774600 | 2.91030300  |
| H  | -3.34731800 | -4.76686000 | 3.33838400  |
| C  | -4.59797900 | -3.01299600 | 3.47514800  |
| H  | -5.14888900 | -3.37067700 | 4.34108000  |
| C  | -4.89142300 | -1.76583100 | 2.92262600  |
| H  | -5.67380000 | -1.14691200 | 3.35422700  |
| C  | -4.18681500 | -1.30693100 | 1.80716500  |
| H  | -4.43362800 | -0.33756000 | 1.38722700  |
| O  | -1.80208700 | 1.60083100  | -0.22828300 |
| P  | 1.34332500  | 1.58582300  | -0.10370700 |
| P  | -2.16735600 | -1.49077000 | -0.20612500 |
| Cl | -0.29317800 | -0.07973700 | -2.37843200 |
| C  | 0.17565000  | 2.86553500  | -0.80205500 |
| H  | 1.77887400  | 4.14862400  | -1.44523400 |
| C  | -0.11410100 | 5.05869500  | -1.82962600 |

|   |             |             |             |
|---|-------------|-------------|-------------|
| C | 0.70527800  | 4.03910100  | -1.35891900 |
| H | 0.32501000  | 5.94830300  | -2.27169900 |
| C | 4.76381500  | -2.53503400 | -0.26073400 |
| C | 5.70612900  | -1.49026500 | -0.34254000 |
| C | 5.17546600  | -3.84906200 | -0.56567100 |
| C | 7.02159800  | -1.75696300 | -0.71408800 |
| H | 5.39253500  | -0.47543100 | -0.12121300 |
| C | 6.49155300  | -4.10553100 | -0.94059600 |
| H | 4.45133600  | -4.65526300 | -0.50201700 |
| C | 7.41901500  | -3.06246700 | -1.01445700 |
| H | 7.73835000  | -0.94228300 | -0.77329700 |
| H | 6.79561500  | -5.12236900 | -1.17392100 |
| H | 8.44602800  | -3.26617400 | -1.30542100 |
| C | 2.26206100  | -2.10562500 | 0.47807500  |
| C | -0.56310800 | -1.02838200 | 3.06955800  |
| C | 1.72553400  | -0.37821300 | 2.74750100  |
| C | -0.45806000 | -0.72932500 | 4.42629500  |
| H | -1.49095300 | -1.43706300 | 2.70355600  |
| C | 1.84932200  | -0.11245900 | 4.11074900  |
| H | 2.59890700  | -0.27510700 | 2.11536500  |
| C | 0.75128900  | -0.27079100 | 4.95559200  |
| H | -1.31949800 | -0.87415100 | 5.07356800  |
| H | 2.80324300  | 0.22448300  | 4.50677500  |
| H | 0.84072300  | -0.05865600 | 6.01811400  |

## INT2-B

Cartesian coordinates

| ATOM | X           | Y           | Z           |
|------|-------------|-------------|-------------|
| Rh   | 0.15840900  | 0.42209300  | -0.19765800 |
| C    | 0.11481300  | 0.68252800  | 1.86220600  |
| C    | -0.81326600 | 2.11073600  | -0.45667900 |
| O    | -0.23288700 | 3.17755100  | -0.57402700 |
| C    | -3.46744800 | 2.20948900  | -0.51259000 |
| C    | 0.95327100  | -5.11447900 | -1.14788000 |
| H    | 1.50100500  | -6.01995700 | -1.38210600 |
| C    | 1.64480800  | -3.97562100 | -0.72452200 |
| C    | 0.90391000  | -2.81393800 | -0.46039900 |
| C    | 3.14895400  | -3.96477800 | -0.45033400 |
| C    | 3.68021600  | -2.58251300 | -0.82924800 |
| C    | 2.88060200  | -1.45995200 | -0.57008600 |
| C    | 3.35847000  | -0.14744400 | -0.74242700 |
| C    | 4.65369800  | 0.01364500  | -1.25575300 |
| H    | 5.03309900  | 1.01612100  | -1.42249100 |
| C    | 5.44644400  | -1.08438700 | -1.57135300 |
| H    | 6.44161800  | -0.93971300 | -1.98134500 |
| C    | 4.96133000  | -2.37029700 | -1.34810800 |
| H    | 5.59547000  | -3.21908100 | -1.57661200 |
| C    | 3.36574200  | -4.16915300 | 1.07860900  |
| H    | 2.86351100  | -3.39131400 | 1.66207500  |
| H    | 4.43488800  | -4.13738000 | 1.31809700  |

|   |             |             |             |
|---|-------------|-------------|-------------|
| H | 2.96639200  | -5.14078500 | 1.39151600  |
| C | 3.88299800  | -5.09419300 | -1.19465500 |
| H | 3.50746900  | -6.07210500 | -0.87992700 |
| H | 4.95028800  | -5.08559500 | -0.95608800 |
| H | 3.76855700  | -5.01000400 | -2.28043400 |
| C | -3.01674100 | -1.46894300 | -1.12680200 |
| C | -4.15156700 | -2.17299900 | -0.68594600 |
| H | -4.17463100 | -2.60300000 | 0.30991500  |
| C | -5.25846300 | -2.32921000 | -1.52387900 |
| H | -6.12457800 | -2.88321900 | -1.17078700 |
| C | -5.25101800 | -1.77558500 | -2.80565600 |
| H | -6.11303000 | -1.89536900 | -3.45681100 |
| C | -4.13225400 | -1.06499700 | -3.24426300 |
| H | -4.11933200 | -0.62640800 | -4.23828400 |
| C | -3.02022500 | -0.90930500 | -2.41484300 |
| H | -2.14708000 | -0.37179700 | -2.76885000 |
| C | -2.17763400 | -1.72873300 | 1.61158100  |
| C | -2.95002800 | -0.75353600 | 2.26529900  |
| H | -3.11089900 | 0.21334800  | 1.79854500  |
| C | -3.49999700 | -1.01178400 | 3.51907500  |
| H | -4.09116300 | -0.24604700 | 4.01361300  |
| C | -3.28078900 | -2.24256500 | 4.14321100  |
| H | -3.70585500 | -2.44045700 | 5.12366100  |
| C | -2.50823000 | -3.21269200 | 3.50574300  |
| H | -2.32898900 | -4.17123400 | 3.98588200  |

|   |             |             |             |
|---|-------------|-------------|-------------|
| C | -1.95888400 | -2.95913000 | 2.24601800  |
| H | -1.36340500 | -3.72512700 | 1.76081800  |
| C | 2.86518400  | 2.63635400  | -1.52120300 |
| C | 3.96148100  | 3.47520800  | -1.25484500 |
| H | 4.50626200  | 3.38419200  | -0.32102100 |
| C | 4.35505800  | 4.44189400  | -2.18161800 |
| H | 5.20456100  | 5.08288200  | -1.96038200 |
| C | 3.65514600  | 4.58863300  | -3.37994000 |
| H | 3.95830800  | 5.34503800  | -4.09942000 |
| C | 2.56091000  | 3.76406100  | -3.64636400 |
| H | 2.00603500  | 3.87576800  | -4.57398900 |
| C | 2.16260400  | 2.79426500  | -2.72562600 |
| H | 1.31565300  | 2.15401100  | -2.94170000 |
| C | 3.09584500  | 1.96182400  | 1.25807800  |
| C | 2.53024600  | 3.11576700  | 1.82770600  |
| H | 1.67910500  | 3.59127900  | 1.34978000  |
| C | 3.05341600  | 3.64699000  | 3.00447500  |
| H | 2.60647500  | 4.53867700  | 3.43555400  |
| C | 4.14065100  | 3.03318700  | 3.63267200  |
| H | 4.54478000  | 3.44841600  | 4.55219600  |
| C | 4.70141000  | 1.88379300  | 3.07734300  |
| H | 5.54555500  | 1.39859500  | 3.56058200  |
| C | 4.18226200  | 1.34895300  | 1.89503800  |
| H | 4.63245900  | 0.45772500  | 1.47071100  |
| O | 1.57606100  | -1.64488800 | -0.09912800 |

|    |             |             |             |
|----|-------------|-------------|-------------|
| P  | -1.51175200 | -1.30864300 | -0.05829000 |
| P  | 2.34929800  | 1.34163500  | -0.30892800 |
| Cl | 0.31904000  | -0.10781500 | -2.68251600 |
| C  | -0.50199900 | -2.79378500 | -0.52372900 |
| H  | -2.23092400 | -3.97082400 | -1.02668700 |
| C  | -0.43339600 | -5.11181500 | -1.26881500 |
| C  | -1.14998200 | -3.96574500 | -0.94205700 |
| H  | -0.95429100 | -6.00277600 | -1.60684600 |
| C  | -4.87571000 | 2.43313000  | -0.52086600 |
| C  | -5.78792000 | 1.35978700  | -0.52479100 |
| C  | -5.36862200 | 3.75476000  | -0.52209800 |
| C  | -7.15830700 | 1.60867800  | -0.52785200 |
| H  | -5.41273300 | 0.34257700  | -0.53052000 |
| C  | -6.74009800 | 3.99232100  | -0.52300100 |
| H  | -4.66361100 | 4.58018600  | -0.52240900 |
| C  | -7.63814300 | 2.92102500  | -0.52578000 |
| H  | -7.85457100 | 0.77447500  | -0.53305200 |
| H  | -7.10979300 | 5.01400800  | -0.52295800 |
| H  | -8.70848100 | 3.10903700  | -0.52755400 |
| C  | -2.25602100 | 2.08029300  | -0.49920200 |
| C  | 0.78912200  | -0.25165300 | 2.66748400  |
| C  | -0.55517900 | 1.72412800  | 2.52727300  |
| C  | 0.79261800  | -0.15767900 | 4.06263200  |
| H  | 1.32625200  | -1.07556500 | 2.20604100  |
| C  | -0.55643200 | 1.82288000  | 3.92262200  |

|   |             |             |            |
|---|-------------|-------------|------------|
| H | -1.09196200 | 2.48421600  | 1.96875400 |
| C | 0.11722500  | 0.88239800  | 4.70127200 |
| H | 1.32747200  | -0.90276100 | 4.64851500 |
| H | -1.08876200 | 2.64459000  | 4.39830500 |
| H | 0.11773300  | 0.95895900  | 5.78582000 |

## 2. Coordinates of TS3-A versus TS3S-A

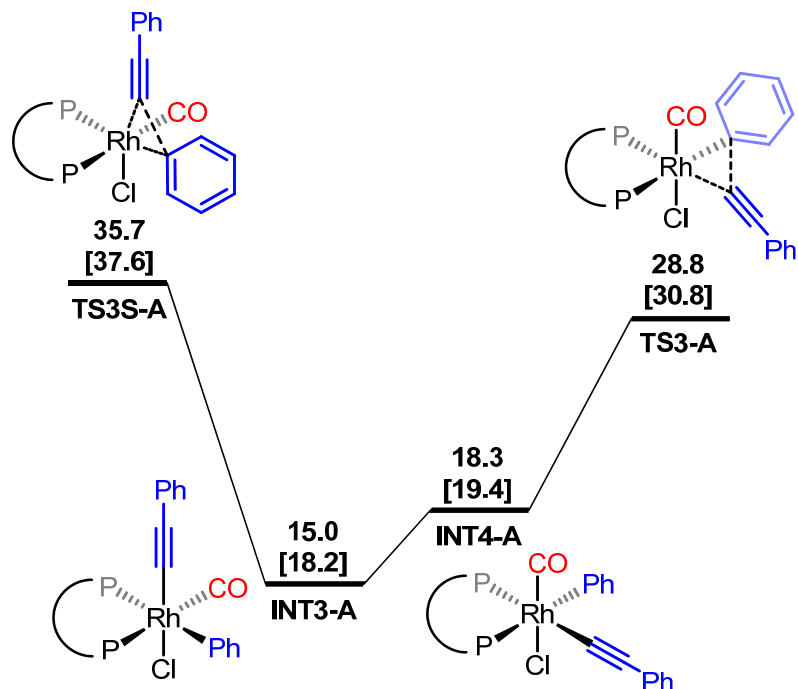

Figure S3

### TS3S-A

Cartesian coordinates

| ATOM | X           | Y           | Z           |
|------|-------------|-------------|-------------|
| Rh   | -0.59459800 | -0.04460700 | -1.57301600 |
| C    | 0.70032200  | -1.52454400 | -1.19753700 |
| C    | 1.69165400  | -2.17296200 | -0.85155500 |
| C    | -0.76489200 | -2.13809000 | -2.24963500 |
| C    | 1.87263200  | -1.14654600 | 3.84921400  |
| C    | 2.52951300  | -0.20733200 | 2.82693800  |
| C    | 1.73396200  | 0.42038700  | 1.86058000  |
| C    | 2.23168100  | 1.32640200  | 0.91164000  |
| C    | 3.59508900  | 1.64701800  | 0.98664900  |



|   |             |             |             |
|---|-------------|-------------|-------------|
| H | 4.02062500  | 2.34649300  | 0.27589400  |
| C | 4.41372500  | 1.05682200  | 1.94767100  |
| H | 5.46832800  | 1.31314000  | 1.99139500  |
| C | 3.88694200  | 0.13011200  | 2.84708200  |
| H | 4.54653300  | -0.32592500 | 3.57748000  |
| C | 1.41924300  | -0.29599200 | 5.07077000  |
| H | 0.71920600  | 0.48935000  | 4.76699900  |
| H | 2.28445100  | 0.18351900  | 5.54302300  |
| H | 0.92211400  | -0.92917600 | 5.81504100  |
| C | 2.85690700  | -2.22966000 | 4.33186700  |
| H | 2.38669200  | -2.88049900 | 5.07511400  |
| H | 3.72268500  | -1.77815800 | 4.82494900  |
| H | 3.21295200  | -2.84570200 | 3.50011000  |
| C | -3.74332400 | -1.01787700 | 0.10864500  |
| C | -4.15307500 | -1.25033800 | -1.21111900 |
| H | -3.47453700 | -1.04578200 | -2.02995800 |
| C | -5.44370600 | -1.71636000 | -1.47453400 |
| H | -5.74902900 | -1.88648300 | -2.50314700 |
| C | -6.33392400 | -1.95532800 | -0.42829400 |
| H | -7.33681500 | -2.31883100 | -0.63687800 |
| C | -5.93878200 | -1.71119200 | 0.89008100  |
| H | -6.63237700 | -1.87950600 | 1.70969800  |
| C | -4.65610000 | -1.23500700 | 1.15661300  |
| H | -4.37054900 | -1.01799100 | 2.18198100  |
| C | -2.55293800 | 1.17342800  | 1.44378400  |

|   |             |            |             |
|---|-------------|------------|-------------|
| C | -2.40771200 | 1.22892600 | 2.83852100  |
| H | -1.93309200 | 0.41581500 | 3.37600400  |
| C | -2.89040300 | 2.32274100 | 3.55936900  |
| H | -2.76944800 | 2.34713600 | 4.63939600  |
| C | -3.52855400 | 3.37299500 | 2.89963100  |
| H | -3.90642900 | 4.22286600 | 3.46195700  |
| C | -3.68137700 | 3.32172300 | 1.51362200  |
| H | -4.17708000 | 4.13353500 | 0.98844600  |
| C | -3.19859200 | 2.23301700 | 0.78700900  |
| H | -3.31745200 | 2.20681400 | -0.29074900 |
| C | 2.35951100  | 2.48555600 | -1.68697300 |
| C | 2.48927600  | 3.80571900 | -2.14024700 |
| H | 1.87111900  | 4.58972800 | -1.71632100 |
| C | 3.41402000  | 4.12589500 | -3.13830400 |
| H | 3.49935900  | 5.15488800 | -3.47773200 |
| C | 4.22516100  | 3.13610800 | -3.69210400 |
| H | 4.94468800  | 3.38783200 | -4.46657000 |
| C | 4.10389600  | 1.81678200 | -3.24716400 |
| H | 4.72911000  | 1.03714000 | -3.67457600 |
| C | 3.17581400  | 1.49215000 | -2.25960400 |
| H | 3.08535300  | 0.46111000 | -1.92659300 |
| C | 0.49087200  | 3.57783700 | 0.22991300  |
| C | -0.55679900 | 4.19679000 | -0.47335800 |
| H | -1.00988000 | 3.69376400 | -1.32425100 |
| C | -1.02734700 | 5.44858800 | -0.07282000 |

|    |             |             |             |
|----|-------------|-------------|-------------|
| H  | -1.83157000 | 5.92156800  | -0.63019500 |
| C  | -0.48008700 | 6.08195900  | 1.04474600  |
| H  | -0.85368600 | 7.05304100  | 1.35934800  |
| C  | 0.54443000  | 5.46058800  | 1.76190100  |
| H  | 0.97044500  | 5.94568600  | 2.63648800  |
| C  | 1.03288700  | 4.21817700  | 1.35457500  |
| H  | 1.83939800  | 3.74989700  | 1.91011800  |
| O  | 0.38112800  | 0.17966600  | 1.81161100  |
| P  | -2.06694300 | -0.32100400 | 0.45210500  |
| P  | 1.10852600  | 1.96678500  | -0.41937400 |
| C  | -1.32019600 | -1.43083900 | 1.72386200  |
| H  | -2.79635100 | -3.00137500 | 1.75742800  |
| C  | -1.14901200 | -3.43681400 | 3.07332300  |
| C  | -1.84588400 | -2.65563700 | 2.14940800  |
| H  | -1.56032400 | -4.38999500 | 3.39247200  |
| C  | 0.06281100  | -2.99234300 | 3.60341200  |
| H  | 0.57054200  | -3.60734300 | 4.33887200  |
| C  | 0.61972300  | -1.76647300 | 3.21564300  |
| C  | -0.08605400 | -1.03052500 | 2.25995100  |
| C  | 0.23327200  | 0.45181900  | -3.20132200 |
| Cl | -2.32008700 | 1.55409100  | -2.51027200 |
| C  | 2.78357500  | -2.99723900 | -0.47820700 |
| C  | 2.67347900  | -3.89807500 | 0.60680800  |
| C  | 4.00466800  | -2.95572500 | -1.18918800 |
| C  | 3.74252500  | -4.71707000 | 0.96029000  |

|   |             |             |             |
|---|-------------|-------------|-------------|
| H | 1.73798300  | -3.94619500 | 1.15512800  |
| C | 5.06875700  | -3.77564700 | -0.82529100 |
| H | 4.10023500  | -2.27477400 | -2.02980500 |
| C | 4.94611300  | -4.65983800 | 0.25046400  |
| H | 3.63476600  | -5.41027300 | 1.79109500  |
| H | 5.99889400  | -3.72744400 | -1.38584300 |
| H | 5.77784000  | -5.30073700 | 0.53001700  |
| O | 0.66124900  | 0.80828900  | -4.20314500 |
| C | -0.53056700 | -2.39447300 | -3.61801200 |
| C | -1.50973000 | -3.09252500 | -1.53037700 |
| C | -1.05865200 | -3.52660000 | -4.23810500 |
| H | 0.07828100  | -1.72570500 | -4.21318300 |
| C | -2.03043000 | -4.22443000 | -2.15459100 |
| H | -1.64440300 | -2.98184700 | -0.46327900 |
| C | -1.81952300 | -4.44746800 | -3.51640800 |
| H | -0.86594200 | -3.68507100 | -5.29645600 |
| H | -2.59915000 | -4.93895500 | -1.56422400 |
| H | -2.22665500 | -5.32968800 | -4.00244900 |

### 3. Coordinates of TS3-deCO versus TS3-A

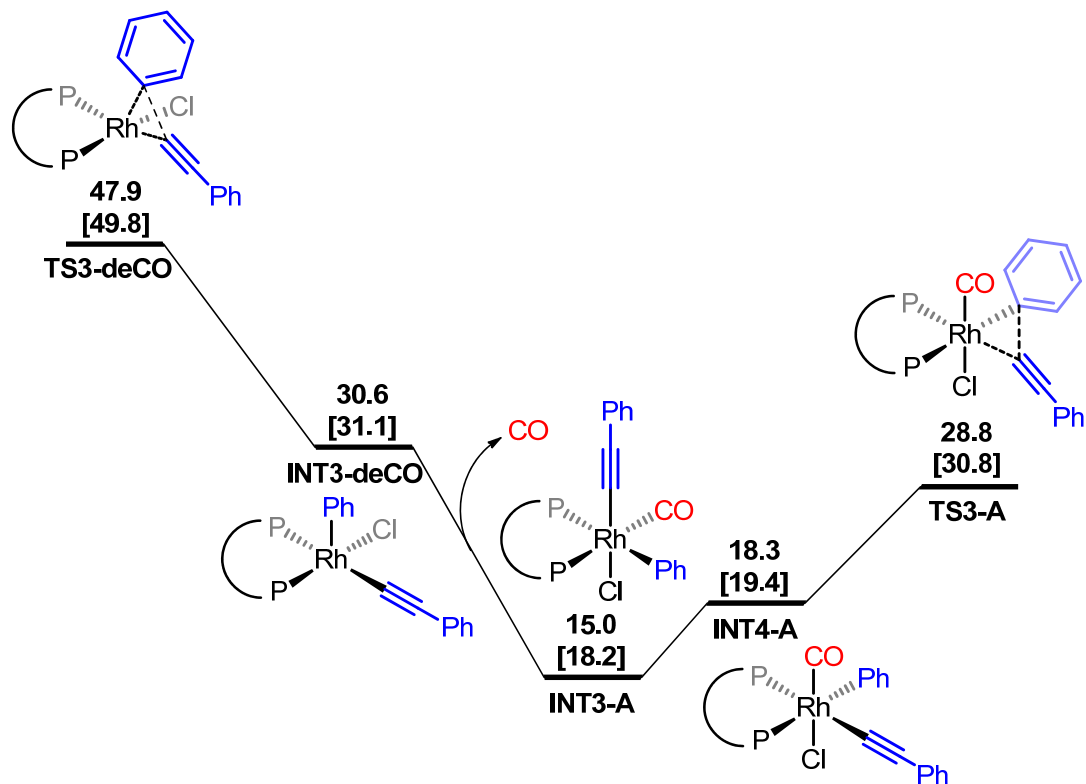

Figure S4

#### INT3-deCO

Cartesian coordinates

| ATOM | X           | Y           | Z           |
|------|-------------|-------------|-------------|
| Rh   | -0.66003800 | 0.90159800  | -0.16182900 |
| C    | -2.63396200 | 0.85971900  | -0.10836700 |
| C    | -3.84895300 | 0.96616000  | 0.00696100  |
| C    | -0.54538800 | 0.82288500  | -2.17118100 |
| C    | -0.09202500 | -3.96222700 | -1.04965800 |
| C    | 3.27955200  | -0.85625200 | -0.24211100 |
| C    | 4.31820300  | -1.68691400 | -0.67680200 |

|   |             |             |             |
|---|-------------|-------------|-------------|
| C | 5.44604500  | -1.06521400 | -1.22125200 |
| H | 6.27686800  | -1.66383200 | -1.57974900 |
| C | 5.52051900  | 0.32592500  | -1.30661700 |
| C | 4.46722800  | 1.12196000  | -0.85752800 |
| C | 3.30953100  | 0.53905200  | -0.31978100 |
| H | 0.47949200  | -5.81147100 | -1.98240900 |
| H | 2.90189400  | -5.41917000 | -1.72651000 |
| H | -1.14971800 | -4.15294200 | -1.17776600 |
| H | 6.40596400  | 0.79349900  | -1.72757800 |
| H | 4.53764300  | 2.20027100  | -0.93686800 |
| O | 2.13334600  | -1.41774700 | 0.29218600  |
| C | 4.14814800  | -3.19737100 | -0.47881400 |
| C | 5.08704800  | -4.00938300 | -1.38587900 |
| H | 4.96228600  | -5.08248800 | -1.21087400 |
| H | 4.90505100  | -3.80774900 | -2.44685600 |
| H | 6.13323900  | -3.77716300 | -1.16478000 |
| C | 4.46861600  | -3.54352200 | 1.00425600  |
| H | 3.82659900  | -2.98511700 | 1.69213200  |
| H | 4.31700600  | -4.61390000 | 1.18528500  |
| H | 5.51143200  | -3.29629500 | 1.23353700  |
| P | -0.85577000 | -1.46921500 | 0.14587500  |
| P | 1.82779900  | 1.50621400  | 0.23899300  |
| C | -2.43892800 | -2.20301800 | -0.45448800 |
| C | -3.19384900 | -3.07344500 | 0.34302100  |
| C | -2.85240400 | -1.94575400 | -1.77123700 |

|   |             |             |             |
|---|-------------|-------------|-------------|
| C | -4.34588900 | -3.67781400 | -0.16799400 |
| H | -2.88946300 | -3.28128800 | 1.36370000  |
| C | -3.99768700 | -2.55689200 | -2.27955300 |
| H | -2.28848300 | -1.25868000 | -2.39303700 |
| C | -4.74809600 | -3.42349200 | -1.48001300 |
| H | -4.92543800 | -4.34727500 | 0.46221600  |
| H | -4.31047900 | -2.34504600 | -3.29819100 |
| H | -5.64356300 | -3.89420900 | -1.87712800 |
| C | -0.90172200 | -1.69165900 | 1.97860400  |
| C | -1.76024500 | -0.86542800 | 2.72752800  |
| C | -0.10871400 | -2.63508200 | 2.64846300  |
| C | -1.81910100 | -0.98821600 | 4.11585700  |
| H | -2.39083700 | -0.13925700 | 2.22195400  |
| C | -0.16886700 | -2.74852000 | 4.03858600  |
| H | 0.55152400  | -3.28989600 | 2.08995700  |
| C | -1.02187500 | -1.92571800 | 4.77538200  |
| H | -2.49022700 | -0.34648000 | 4.68004100  |
| H | 0.45177900  | -3.48396100 | 4.54365300  |
| H | -1.06637000 | -2.01595400 | 5.85745600  |
| C | 2.04767600  | 1.56814300  | 2.07754500  |
| C | 1.05933100  | 2.20888000  | 2.84694700  |
| C | 3.14364800  | 0.98575100  | 2.73191900  |
| C | 1.17338600  | 2.26302500  | 4.23653600  |
| H | 0.21352100  | 2.68036800  | 2.35466000  |
| C | 3.24913000  | 1.03813400  | 4.12344200  |

|    |             |             |             |
|----|-------------|-------------|-------------|
| H  | 3.92378100  | 0.49535400  | 2.15921700  |
| C  | 2.26469000  | 1.67532000  | 4.87955500  |
| H  | 0.40392000  | 2.76691200  | 4.81534200  |
| H  | 4.10553700  | 0.58238900  | 4.61392700  |
| H  | 2.34881700  | 1.71614300  | 5.96244000  |
| C  | 2.30721000  | 3.19073200  | -0.34047800 |
| C  | 1.99649800  | 3.55360400  | -1.66036300 |
| C  | 3.01286100  | 4.09057000  | 0.46895400  |
| C  | 2.39697900  | 4.79104800  | -2.16156800 |
| H  | 1.42521800  | 2.87719800  | -2.28797900 |
| C  | 3.40416100  | 5.33388000  | -0.03417300 |
| H  | 3.25441300  | 3.82678700  | 1.49371200  |
| C  | 3.09980000  | 5.68499200  | -1.34968800 |
| H  | 2.14517700  | 5.06297300  | -3.18304400 |
| H  | 3.94470000  | 6.02659600  | 0.60565300  |
| H  | 3.40241900  | 6.65340600  | -1.73950900 |
| C  | 0.83122700  | -4.90044500 | -1.50717600 |
| Cl | -0.94460000 | 3.29240300  | 0.07043100  |
| C  | 2.20046000  | -4.67691800 | -1.36099500 |
| C  | 2.67147200  | -3.51370500 | -0.74653500 |
| C  | 1.71677400  | -2.58756900 | -0.30573400 |
| C  | 0.33514500  | -2.77042900 | -0.44104300 |
| C  | -5.25789900 | 1.14432700  | 0.15391400  |
| C  | -6.14192400 | 0.04519300  | 0.16553700  |
| C  | -5.79755100 | 2.44119900  | 0.29353000  |



|   |             |             |             |
|---|-------------|-------------|-------------|
| C | -7.51376600 | 0.24012400  | 0.31227400  |
| H | -5.73746200 | -0.95625600 | 0.05735000  |
| C | -7.17009500 | 2.62747700  | 0.43848700  |
| H | -5.12093800 | 3.29039600  | 0.28599100  |
| C | -8.03502300 | 1.52941900  | 0.44898700  |
| H | -8.18065800 | -0.61881000 | 0.31902000  |
| H | -7.56731600 | 3.63401500  | 0.54421600  |
| H | -9.10588800 | 1.67755100  | 0.56242400  |
| C | 0.41847900  | 0.04153200  | -2.81952900 |
| C | -1.41577700 | 1.61518800  | -2.93395900 |
| C | 0.51830300  | 0.05666600  | -4.21686500 |
| H | 1.10415200  | -0.57671200 | -2.25068000 |
| C | -1.30733000 | 1.62268400  | -4.32867100 |
| H | -2.16303600 | 2.22623000  | -2.44440400 |
| C | -0.34393900 | 0.84628000  | -4.97688500 |
| H | 1.27617100  | -0.55429200 | -4.70207500 |
| H | -1.98579300 | 2.24562000  | -4.90706700 |
| H | -0.26687900 | 0.85748000  | -6.06101300 |

### TS3-deCO

Cartesian coordinates

| ATOM | X          | Y          | Z           |
|------|------------|------------|-------------|
| Rh   | 0.71740800 | 0.76674300 | -0.06725900 |
| C    | 1.59067000 | 1.02441200 | 1.84428500  |
| C    | 2.65975500 | 0.66295700 | 0.30355300  |

|   |             |             |             |
|---|-------------|-------------|-------------|
| C | 0.06102800  | -3.96256100 | 1.29470500  |
| C | -3.17599400 | -0.63281100 | 0.86004100  |
| C | -4.13670200 | -1.28491600 | 1.64227800  |
| C | -5.07203200 | -0.48179400 | 2.30121500  |
| H | -5.83337800 | -0.93562900 | 2.92677600  |
| C | -5.04440200 | 0.90627200  | 2.15908600  |
| C | -4.07271700 | 1.51931600  | 1.36909400  |
| C | -3.09934100 | 0.75437600  | 0.70739800  |
| H | -0.39591000 | -5.62554900 | 2.57840200  |
| H | -2.76169200 | -5.00330700 | 2.87831000  |
| H | 1.09853500  | -4.25152100 | 1.18003100  |
| H | -5.78356600 | 1.51571600  | 2.67109100  |
| H | -4.06026400 | 2.59876000  | 1.27877600  |
| O | -2.22810600 | -1.37564200 | 0.18531600  |
| C | -4.12101400 | -2.81887700 | 1.66770000  |
| C | -4.84955700 | -3.38277900 | 2.89926400  |
| H | -4.84259300 | -4.47708000 | 2.88715200  |
| H | -4.39068600 | -3.04368400 | 3.83403100  |
| H | -5.90057000 | -3.07836500 | 2.89970200  |
| C | -4.83182900 | -3.34061600 | 0.38541900  |
| H | -4.34728300 | -2.96109100 | -0.51934800 |
| H | -4.80641200 | -4.43605400 | 0.35457300  |
| H | -5.87873300 | -3.01629300 | 0.37412500  |
| P | 0.63593100  | -1.62514900 | -0.30609700 |
| P | -1.71962100 | 1.49549700  | -0.29839300 |

|   |             |             |             |
|---|-------------|-------------|-------------|
| C | 2.24053100  | -2.56407400 | -0.30071300 |
| C | 2.60060900  | -3.39133100 | -1.37564600 |
| C | 3.07884300  | -2.52826800 | 0.82653300  |
| C | 3.76235400  | -4.16544700 | -1.32409200 |
| H | 1.97434400  | -3.44005400 | -2.25897000 |
| C | 4.22756200  | -3.31859200 | 0.88467300  |
| H | 2.84435000  | -1.88293600 | 1.66400300  |
| C | 4.57561000  | -4.13801400 | -0.19182700 |
| H | 4.02362400  | -4.79489000 | -2.17055900 |
| H | 4.85479300  | -3.28446300 | 1.77165800  |
| H | 5.47439900  | -4.74736500 | -0.14763300 |
| C | 0.08183700  | -1.82341200 | -2.05527500 |
| C | 0.65430400  | -0.97127200 | -3.01555000 |
| C | -0.84626300 | -2.78970600 | -2.46782200 |
| C | 0.30502400  | -1.08935000 | -4.36090000 |
| H | 1.37588700  | -0.21701900 | -2.71033000 |
| C | -1.19704300 | -2.90013100 | -3.81465500 |
| H | -1.29102100 | -3.46344100 | -1.74246300 |
| C | -0.62289700 | -2.05185500 | -4.76307600 |
| H | 0.75571700  | -0.42392400 | -5.09173900 |
| H | -1.91889900 | -3.65247800 | -4.12157700 |
| H | -0.89819000 | -2.14006000 | -5.81058200 |
| C | -2.39907500 | 1.44956700  | -2.02060700 |
| C | -1.60450500 | 1.96611600  | -3.05968700 |
| C | -3.66443200 | 0.92951500  | -2.32859600 |

|    |             |             |             |
|----|-------------|-------------|-------------|
| C  | -2.07847100 | 1.97205800  | -4.37154000 |
| H  | -0.62396300 | 2.37548900  | -2.83225100 |
| C  | -4.12843900 | 0.92595700  | -3.64625500 |
| H  | -4.29784100 | 0.53250600  | -1.54209100 |
| C  | -3.33891300 | 1.44926900  | -4.67029600 |
| H  | -1.45729100 | 2.38518200  | -5.16207700 |
| H  | -5.11163800 | 0.51843500  | -3.86768700 |
| H  | -3.70372800 | 1.45182100  | -5.69427700 |
| C  | -1.91393100 | 3.26711900  | 0.19725200  |
| C  | -1.36556900 | 3.67100400  | 1.42435000  |
| C  | -2.62853500 | 4.19752900  | -0.56782300 |
| C  | -1.53465500 | 4.97787400  | 1.87779600  |
| H  | -0.78891600 | 2.96917500  | 2.01831600  |
| C  | -2.78887200 | 5.50993500  | -0.11452600 |
| H  | -3.05751400 | 3.90599800  | -1.52062100 |
| C  | -2.24529600 | 5.90277000  | 1.10837700  |
| H  | -1.09945300 | 5.27608700  | 2.82798000  |
| H  | -3.33922100 | 6.22350400  | -0.72238600 |
| H  | -2.37005900 | 6.92410000  | 1.45872500  |
| C  | -0.78488900 | -4.73815700 | 2.08741500  |
| Cl | 1.15970700  | 2.99875700  | -0.95776700 |
| C  | -2.12495900 | -4.38537900 | 2.25406700  |
| C  | -2.65163600 | -3.25605600 | 1.61973600  |
| C  | -1.77282600 | -2.49735000 | 0.83906100  |
| C  | -0.41941100 | -2.80587300 | 0.66120400  |

|   |            |             |             |
|---|------------|-------------|-------------|
| C | 5.27940600 | 0.92908000  | 0.01215900  |
| C | 6.20460500 | -0.13480500 | 0.09547200  |
| C | 5.77005800 | 2.23303300  | -0.23419200 |
| C | 7.56773600 | 0.10092400  | -0.05752700 |
| H | 5.83560200 | -1.13946500 | 0.27268900  |
| C | 7.13480700 | 2.45779600  | -0.38415600 |
| H | 5.05960900 | 3.05026900  | -0.31012000 |
| C | 8.03980800 | 1.39522100  | -0.29568200 |
| H | 8.26749600 | -0.72855800 | 0.00794600  |
| H | 7.49581400 | 3.46543600  | -0.57337600 |
| H | 9.10521400 | 1.57429400  | -0.41429700 |
| C | 3.88423200 | 0.72543500  | 0.16383000  |
| C | 1.34620600 | 0.01928200  | 2.79908500  |
| C | 1.84287800 | 2.33558100  | 2.30026500  |
| C | 1.33888000 | 0.31936800  | 4.16419300  |
| H | 1.12662200 | -0.99479200 | 2.48867400  |
| C | 1.83888500 | 2.61920700  | 3.66507700  |
| H | 2.03949500 | 3.11781900  | 1.57825600  |
| C | 1.58709300 | 1.61767300  | 4.60831800  |
| H | 1.13096600 | -0.47431600 | 4.87821700  |
| H | 2.03969800 | 3.63726200  | 3.99125200  |
| H | 1.58737400 | 1.84677300  | 5.67046900  |

#### 4. Coordinates of all stationary points of 1t in figure 3

##### CAT-2t

Cartesian coordinates

| ATOM | X           | Y          | Z           |
|------|-------------|------------|-------------|
| C    | -2.33173900 | 1.58832000 | -0.56263300 |
| C    | -3.51702700 | 2.32002800 | -0.71888100 |
| H    | -4.39985200 | 2.02096300 | -0.16371700 |
| C    | -3.57240000 | 3.43499500 | -1.54974100 |
| H    | -4.49589200 | 3.99866600 | -1.64483100 |
| C    | -2.44088800 | 3.82159400 | -2.26449000 |
| H    | -2.50206900 | 4.68230300 | -2.92114200 |
| C    | -1.23850400 | 3.11651500 | -2.15273200 |
| C    | -1.19595300 | 2.02562300 | -1.27264800 |
| C    | 0.00001400  | 3.41546300 | -3.00204700 |
| C    | 1.23853000  | 3.11649400 | -2.15273400 |
| C    | 1.19596400  | 2.02560200 | -1.27265200 |
| C    | 2.33174500  | 1.58827800 | -0.56264000 |
| C    | 3.51704700  | 2.31996200 | -0.71890200 |
| H    | 4.39987200  | 2.02088100 | -0.16374600 |
| C    | 3.57243700  | 3.43492600 | -1.54976500 |
| H    | 4.49594000  | 3.99857700 | -1.64486300 |
| C    | 2.44092600  | 3.82154900 | -2.26450300 |
| H    | 2.50211900  | 4.68225600 | -2.92115600 |
| C    | 0.00000700  | 2.44218800 | -4.21792100 |
| H    | 0.00000800  | 1.39762200 | -3.89117700 |

|   |             |             |             |
|---|-------------|-------------|-------------|
| H | 0.89018800  | 2.60689200  | -4.83598100 |
| H | -0.89017900 | 2.60689500  | -4.83597300 |
| C | 0.00002300  | 4.85787400  | -3.53756000 |
| H | -0.87518100 | 5.03658400  | -4.16894600 |
| H | 0.87524200  | 5.03658600  | -4.16892300 |
| H | 0.00001200  | 5.59356100  | -2.72651100 |
| C | -3.53096600 | 0.45673500  | 1.87954500  |
| C | -4.89739200 | 0.16303500  | 1.72843000  |
| H | -5.26083600 | -0.28398700 | 0.80848100  |
| C | -5.79725800 | 0.42798400  | 2.76219900  |
| H | -6.85087900 | 0.19511300  | 2.63083400  |
| C | -5.34416100 | 0.98361700  | 3.96019200  |
| H | -6.04502400 | 1.18677900  | 4.76591500  |
| C | -3.98770900 | 1.27321200  | 4.11941500  |
| H | -3.62748000 | 1.70575200  | 5.04911900  |
| C | -3.08234300 | 1.01067600  | 3.08973200  |
| H | -2.03099600 | 1.25378100  | 3.20686200  |
| C | -3.15312100 | -1.20337000 | -0.43733600 |
| C | -3.38160500 | -2.44664300 | 0.17809200  |
| H | -3.08179600 | -2.60206800 | 1.21033900  |
| C | -3.98753900 | -3.48613400 | -0.52452900 |
| H | -4.15636600 | -4.44096700 | -0.03400600 |
| C | -4.36763400 | -3.30511700 | -1.85677300 |
| H | -4.83519600 | -4.11790100 | -2.40602500 |
| C | -4.13997200 | -2.07782900 | -2.47867100 |

|   |             |             |             |
|---|-------------|-------------|-------------|
| H | -4.43278200 | -1.92818700 | -3.51470900 |
| C | -3.53619200 | -1.03266400 | -1.77484200 |
| H | -3.37032700 | -0.08165400 | -2.27033900 |
| C | 3.53094900  | 0.45675000  | 1.87955900  |
| C | 4.89737200  | 0.16301700  | 1.72847400  |
| H | 5.26081800  | -0.28406800 | 0.80855600  |
| C | 5.79723500  | 0.42801800  | 2.76223300  |
| H | 6.85085300  | 0.19512200  | 2.63089000  |
| C | 5.34413800  | 0.98373600  | 3.96018700  |
| H | 6.04499900  | 1.18694000  | 4.76590100  |
| C | 3.98769000  | 1.27336200  | 4.11938100  |
| H | 3.62746000  | 1.70596700  | 5.04905400  |
| C | 3.08232700  | 1.01077400  | 3.08970800  |
| H | 2.03098400  | 1.25390400  | 3.20681700  |
| C | 3.15314000  | -1.20341500 | -0.43727200 |
| C | 3.38157800  | -2.44668200 | 0.17818600  |
| H | 3.08169900  | -2.60209300 | 1.21041500  |
| C | 3.98755900  | -3.48618200 | -0.52438000 |
| H | 4.15635300  | -4.44100900 | -0.03383300 |
| C | 4.36774200  | -3.30518400 | -1.85660200 |
| H | 4.83534000  | -4.11797600 | -2.40581300 |
| C | 4.14012300  | -2.07790400 | -2.47853100 |
| H | 4.43300100  | -1.92827500 | -3.51455200 |
| C | 3.53630000  | -1.03272800 | -1.77475400 |
| H | 3.37047400  | -0.08172300 | -2.27027500 |



|    |             |             |             |
|----|-------------|-------------|-------------|
| O  | -0.00000100 | 1.33398400  | -1.10939400 |
| P  | -2.29731900 | 0.10166600  | 0.54703000  |
| P  | 2.29730900  | 0.10163500  | 0.54704400  |
| Cl | -0.00003200 | 2.13643400  | 1.98352100  |
| Rh | -0.00000700 | -0.16987500 | 0.93052000  |
| C  | -0.00003500 | -2.25506100 | 0.50102600  |
| C  | -0.00007000 | -2.06255800 | 1.76238700  |
| C  | -0.00001700 | -3.16301300 | -0.62319100 |
| C  | 0.00003100  | -2.69287100 | -1.94884200 |
| C  | -0.00004700 | -4.55872600 | -0.41100900 |
| C  | 0.00004500  | -3.58302900 | -3.02154300 |
| H  | 0.00005700  | -1.62092800 | -2.12020300 |
| C  | -0.00003500 | -5.44409300 | -1.48467900 |
| H  | -0.00007900 | -4.93771100 | 0.60752800  |
| C  | 0.00001100  | -4.96125500 | -2.79723600 |
| H  | 0.00008300  | -3.19819200 | -4.03841900 |
| H  | -0.00005900 | -6.51549200 | -1.29833600 |
| H  | 0.00002300  | -5.65365100 | -3.63508000 |
| C  | -0.00015600 | -2.49036700 | 3.17716200  |
| H  | -0.00022500 | -3.58606900 | 3.25985800  |
| H  | 0.88084900  | -2.10633900 | 3.70681500  |
| H  | -0.88116600 | -2.10623400 | 3.70673200  |

**1t**

Cartesian coordinates

| ATOM | X           | Y           | Z           |
|------|-------------|-------------|-------------|
| C    | -2.99401200 | 1.24713500  | -0.00028100 |
| C    | -3.72416000 | 0.05524000  | 0.00003200  |
| C    | -3.05783400 | -1.17351700 | 0.00031900  |
| C    | -1.66640800 | -1.21551300 | 0.00028100  |
| C    | -0.92146500 | -0.01879900 | -0.00002300 |
| C    | -1.60228000 | 1.21525400  | -0.00030000 |
| H    | -3.51111100 | 2.20255500  | -0.00050800 |
| H    | -4.81030000 | 0.08401500  | 0.00005500  |
| H    | -3.62445900 | -2.10038000 | 0.00056700  |
| H    | -1.14056200 | -2.16501600 | 0.00048700  |
| H    | -1.02848800 | 2.13680300  | -0.00053000 |
| C    | 0.50261900  | -0.06029900 | -0.00004500 |
| C    | 1.71824400  | -0.11285600 | -0.00006500 |
| C    | 3.16734100  | -0.18257600 | -0.00007600 |
| O    | 3.75369300  | -1.25402800 | -0.00061100 |
| C    | 3.89336400  | 1.14993100  | 0.00059100  |
| H    | 3.61069100  | 1.73743300  | -0.88138800 |
| H    | 3.61052900  | 1.73667100  | 0.88301000  |
| H    | 4.97170200  | 0.97615200  | 0.00059000  |

**2t**

Cartesian coordinates

| ATOM | X          | Y          | Z          |
|------|------------|------------|------------|
| C    | 2.60701800 | 0.00039200 | 0.00008400 |

|   |             |             |             |
|---|-------------|-------------|-------------|
| C | 1.39455400  | 0.00036500  | 0.00010100  |
| C | -0.03528400 | 0.00020600  | 0.00007500  |
| C | -0.75282300 | -1.21215800 | 0.00004500  |
| C | -0.75326300 | 1.21231800  | 0.00003500  |
| C | -2.14583600 | -1.20834000 | -0.00002300 |
| H | -0.20498300 | -2.14957600 | 0.00002900  |
| C | -2.14626000 | 1.20800800  | -0.00003900 |
| H | -0.20582900 | 2.14997500  | 0.00008600  |
| C | -2.84787300 | -0.00029500 | -0.00006800 |
| H | -2.68558400 | -2.15165700 | -0.00008200 |
| H | -2.68633700 | 2.15113700  | -0.00004600 |
| H | -3.93449600 | -0.00048100 | -0.00013200 |
| C | 4.06665400  | -0.00012700 | -0.00009900 |
| H | 4.46549300  | -0.49691100 | -0.89351600 |
| H | 4.46470700  | 1.02173000  | 0.01685700  |
| H | 4.46571100  | -0.52643400 | 0.87613100  |

### INT1-1t

Cartesian coordinates

| ATOM | X          | Y          | Z           |
|------|------------|------------|-------------|
| C    | 2.34272600 | 1.87168500 | -0.37605400 |
| C    | 3.53947900 | 2.52778700 | -0.69476400 |
| H    | 4.42965100 | 1.93964500 | -0.89087800 |
| C    | 3.59801100 | 3.91501100 | -0.78519400 |
| H    | 4.53066300 | 4.40552900 | -1.04797100 |

|   |             |             |             |
|---|-------------|-------------|-------------|
| C | 2.45772000  | 4.67291400  | -0.52793800 |
| H | 2.52235700  | 5.75377600  | -0.58170900 |
| C | 1.24264400  | 4.06680600  | -0.19366600 |
| C | 1.19798000  | 2.66551500  | -0.15857600 |
| C | 0.00055100  | 4.85224200  | 0.23671900  |
| C | -1.24173900 | 4.06707400  | -0.19358000 |
| C | -1.19736700 | 2.66577300  | -0.15851200 |
| C | -2.34229100 | 1.87218800  | -0.37594300 |
| C | -3.53893000 | 2.52854500  | -0.69455000 |
| H | -4.42923600 | 1.94059000  | -0.89061300 |
| C | -3.59718300 | 3.91578400  | -0.78493600 |
| H | -4.52975300 | 4.40650200  | -1.04763000 |
| C | -2.45671300 | 4.67344200  | -0.52774900 |
| H | -2.52113000 | 5.75431900  | -0.58149300 |
| C | 0.00061700  | 4.93464900  | 1.79232600  |
| H | 0.00051100  | 3.93796500  | 2.24476600  |
| H | -0.88929900 | 5.47002800  | 2.14358200  |
| H | 0.89069000  | 5.46980800  | 2.14351900  |
| C | 0.00068700  | 6.28496500  | -0.32727500 |
| H | 0.87517700  | 6.84052300  | 0.02345000  |
| H | -0.87364200 | 6.84072400  | 0.02353400  |
| H | 0.00063600  | 6.29168100  | -1.42237600 |
| C | 3.56387700  | -0.57636300 | -1.46098500 |
| C | 4.92474200  | -0.68479200 | -1.12413900 |
| H | 5.26309000  | -0.42062300 | -0.12723400 |

|   |             |             |             |
|---|-------------|-------------|-------------|
| C | 5.85176500  | -1.14521200 | -2.06046600 |
| H | 6.90028000  | -1.22379600 | -1.78487800 |
| C | 5.43232100  | -1.50786500 | -3.34174700 |
| H | 6.15438000  | -1.86915900 | -4.06955300 |
| C | 4.08217100  | -1.40787400 | -3.68163300 |
| H | 3.74773600  | -1.68909200 | -4.67673200 |
| C | 3.14954100  | -0.94847100 | -2.74998500 |
| H | 2.10292600  | -0.85630500 | -3.02099700 |
| C | 3.11953500  | -0.33919900 | 1.37002300  |
| C | 3.38257200  | -1.68328000 | 1.69026500  |
| H | 3.14176600  | -2.46820500 | 0.97836400  |
| C | 3.96228000  | -2.02092600 | 2.91265600  |
| H | 4.16984400  | -3.06336800 | 3.14032300  |
| C | 4.27416200  | -1.02313200 | 3.84066200  |
| H | 4.72314500  | -1.28625800 | 4.79473500  |
| C | 4.00263300  | 0.31078900  | 3.53739800  |
| H | 4.23563100  | 1.09219900  | 4.25568700  |
| C | 3.42820300  | 0.65206400  | 2.31043400  |
| H | 3.21974200  | 1.69337500  | 2.08951800  |
| C | -3.56398300 | -0.57553000 | -1.46095500 |
| C | -4.92486300 | -0.68373500 | -1.12409400 |
| H | -5.26314900 | -0.41960100 | -0.12715900 |
| C | -5.85199000 | -1.14388800 | -2.06045000 |
| H | -6.90051400 | -1.22230300 | -1.78484800 |
| C | -5.43264400 | -1.50648800 | -3.34177800 |

|    |             |             |             |
|----|-------------|-------------|-------------|
| H  | -6.15478600 | -1.86757000 | -4.06960600 |
| C  | -4.08248200 | -1.40671500 | -3.68168100 |
| H  | -3.74811800 | -1.68789300 | -4.67681500 |
| C  | -3.14974600 | -0.94758800 | -2.75000300 |
| H  | -2.10311900 | -0.85560100 | -3.02102600 |
| C  | -3.11952700 | -0.33858200 | 1.37007100  |
| C  | -3.38302200 | -1.68259400 | 1.69022400  |
| H  | -3.14255200 | -2.46755100 | 0.97824300  |
| C  | -3.96276300 | -2.02013200 | 2.91263000  |
| H  | -4.17068600 | -3.06251700 | 3.14022700  |
| C  | -4.27421800 | -1.02230100 | 3.84074100  |
| H  | -4.72322900 | -1.28534300 | 4.79482300  |
| C  | -4.00222700 | 0.31154600  | 3.53756800  |
| H  | -4.23488900 | 1.09298100  | 4.25593900  |
| C  | -3.42776400 | 0.65271400  | 2.31059000  |
| H  | -3.21893900 | 1.69396800  | 2.08974300  |
| O  | 0.00024400  | 2.02739200  | 0.12248000  |
| P  | 2.30463900  | 0.02213500  | -0.24504300 |
| P  | -2.30458900 | 0.02263000  | -0.24500500 |
| Cl | 0.00010500  | 0.47489100  | -2.71185000 |
| Rh | -0.00003500 | -0.42527300 | -0.35708900 |
| C  | -0.00004500 | -1.03229200 | 2.89432400  |
| O  | 0.00013300  | 0.13631700  | 3.26526100  |
| C  | -0.00012900 | -1.40717300 | 1.48855600  |
| C  | -0.00029000 | -2.27768800 | 0.54184400  |

|   |             |             |             |
|---|-------------|-------------|-------------|
| C | -0.00054000 | -3.63413700 | 0.05082300  |
| C | -0.00063400 | -4.72562800 | 0.94631800  |
| C | -0.00070700 | -3.89259800 | -1.33385500 |
| C | -0.00088000 | -6.03187400 | 0.46580100  |
| H | -0.00051400 | -4.53538400 | 2.01525800  |
| C | -0.00095600 | -5.20293700 | -1.80729700 |
| H | -0.00064100 | -3.04809600 | -2.01675500 |
| C | -0.00104100 | -6.27545700 | -0.91158400 |
| H | -0.00094900 | -6.86351600 | 1.16573300  |
| H | -0.00108300 | -5.38790200 | -2.87811100 |
| H | -0.00123400 | -7.29671100 | -1.28318700 |
| C | -0.00020700 | -2.17744700 | 3.90076500  |
| H | 0.88602900  | -2.80713700 | 3.75978700  |
| H | -0.00006300 | -1.76744300 | 4.91360000  |
| H | -0.88671900 | -2.80677400 | 3.75989700  |

### TS1-1t

Cartesian coordinates

| ATOM | X           | Y           | Z           |
|------|-------------|-------------|-------------|
| Rh   | 0.00585700  | -0.15784700 | 1.01372500  |
| C    | -0.01940800 | 1.90161400  | 1.08901500  |
| C    | 0.16329500  | 1.58549600  | 2.59545800  |
| O    | 1.27705300  | 1.61305300  | 3.11437200  |
| C    | -0.13099600 | 2.92508600  | 0.38945800  |
| C    | 2.54710400  | -3.22457400 | -3.15800700 |

|   |             |             |             |
|---|-------------|-------------|-------------|
| H | 2.63084000  | -3.89494400 | -4.00617800 |
| C | 1.34151800  | -2.56458900 | -2.90743300 |
| C | 1.26621200  | -1.72373000 | -1.78652800 |
| C | 0.11365800  | -2.64951600 | -3.81788600 |
| C | -1.12371300 | -2.63906600 | -2.91572800 |
| C | -1.10562500 | -1.80050500 | -1.78913600 |
| C | -2.23311200 | -1.63305200 | -0.95951800 |
| C | -3.38044200 | -2.37417000 | -1.27844100 |
| H | -4.25811500 | -2.29178800 | -0.64845700 |
| C | -3.40851700 | -3.24092200 | -2.36604300 |
| H | -4.30496000 | -3.81597400 | -2.57941400 |
| C | -2.28573600 | -3.36703300 | -3.18082700 |
| H | -2.32240000 | -4.03648700 | -4.03305800 |
| C | 0.07864700  | -1.37731900 | -4.71519000 |
| H | 0.05107300  | -0.46518900 | -4.11154200 |
| H | -0.80915900 | -1.39051700 | -5.35823700 |
| H | 0.96947300  | -1.33835700 | -5.35286300 |
| C | 0.15347000  | -3.88388800 | -4.73445300 |
| H | 1.03213500  | -3.85356500 | -5.38585300 |
| H | -0.71936600 | -3.90415200 | -5.39402600 |
| H | 0.17794500  | -4.81735100 | -4.16230200 |
| C | 3.53953100  | -0.96543500 | 1.70688500  |
| C | 4.91476200  | -0.70368900 | 1.57777600  |
| H | 5.28078800  | -0.10453500 | 0.74973700  |
| C | 5.82191100  | -1.19300000 | 2.51860200  |



|   |             |             |             |
|---|-------------|-------------|-------------|
| H | 6.88210300  | -0.98184800 | 2.40418300  |
| C | 5.36712400  | -1.94123700 | 3.60602800  |
| H | 6.07311600  | -2.31820200 | 4.34169300  |
| C | 4.00215600  | -2.19483100 | 3.74801500  |
| H | 3.63916900  | -2.77000600 | 4.59564300  |
| C | 3.09074600  | -1.70923500 | 2.80879500  |
| H | 2.03241900  | -1.91707600 | 2.91719300  |
| C | 3.17354800  | 1.18658600  | -0.14094200 |
| C | 3.46086600  | 2.22028700  | 0.77058000  |
| H | 3.12247300  | 2.13692000  | 1.79897200  |
| C | 4.16693400  | 3.34939000  | 0.35593900  |
| H | 4.39296400  | 4.13282500  | 1.07479100  |
| C | 4.57980900  | 3.47769400  | -0.97441400 |
| H | 5.13630300  | 4.35575300  | -1.29259400 |
| C | 4.26984300  | 2.47243200  | -1.89092000 |
| H | 4.57963300  | 2.56392400  | -2.92893700 |
| C | 3.57281900  | 1.33280900  | -1.47710900 |
| H | 3.35784100  | 0.55113200  | -2.19812700 |
| C | -3.43786100 | -1.24447000 | 1.71525300  |
| C | -4.83503000 | -1.19412800 | 1.55830900  |
| H | -5.27101900 | -0.68970300 | 0.70168300  |
| C | -5.68007700 | -1.76930100 | 2.50827700  |
| H | -6.75707900 | -1.72095000 | 2.36949300  |
| C | -5.14344800 | -2.39852800 | 3.63345300  |
| H | -5.80169500 | -2.84482400 | 4.37439900  |

|    |             |             |             |
|----|-------------|-------------|-------------|
| C  | -3.75935900 | -2.44615300 | 3.80344700  |
| H  | -3.33278300 | -2.93239700 | 4.67666800  |
| C  | -2.91028500 | -1.87187000 | 2.85502400  |
| H  | -1.83464400 | -1.93064500 | 2.97954100  |
| C  | -3.25539700 | 0.93819700  | -0.15734500 |
| C  | -3.98945200 | 1.76423800  | 0.71174300  |
| H  | -4.00912700 | 1.55099700  | 1.77608900  |
| C  | -4.73838300 | 2.83543000  | 0.22073600  |
| H  | -5.31627200 | 3.44633700  | 0.90966300  |
| C  | -4.75578100 | 3.11180400  | -1.14858400 |
| H  | -5.34679700 | 3.93891900  | -1.53307200 |
| C  | -4.00785600 | 2.31692800  | -2.01827300 |
| H  | -4.00808100 | 2.52538600  | -3.08487100 |
| C  | -3.26508100 | 1.24103600  | -1.52755200 |
| H  | -2.70349400 | 0.62407100  | -2.22148700 |
| O  | 0.05749600  | -1.10030900 | -1.50554000 |
| P  | 2.29998100  | -0.31826100 | 0.49477300  |
| P  | -2.25634700 | -0.48034200 | 0.50608400  |
| Cl | 0.08070000  | -2.61548500 | 1.36711900  |
| C  | 2.37499600  | -1.48092600 | -0.95177900 |
| H  | 4.43062300  | -2.01776500 | -0.61244000 |
| C  | 3.65303900  | -3.03028600 | -2.33298500 |
| C  | 3.56604000  | -2.15903400 | -1.25143400 |
| H  | 4.58235700  | -3.55520400 | -2.53471600 |
| C  | -0.23813100 | 4.08262300  | -0.41269700 |

|   |             |            |             |
|---|-------------|------------|-------------|
| C | -1.48030200 | 4.74370900 | -0.55353400 |
| C | 0.89665100  | 4.60024100 | -1.08037600 |
| C | -1.57775200 | 5.89123400 | -1.33236200 |
| H | -2.35122100 | 4.33954900 | -0.04995000 |
| C | 0.78295600  | 5.74151600 | -1.86665100 |
| H | 1.84929400  | 4.09509600 | -0.97081600 |
| C | -0.44960600 | 6.39107200 | -1.99148700 |
| H | -2.53483200 | 6.39550800 | -1.43294700 |
| H | 1.65781000  | 6.13057400 | -2.38008700 |
| H | -0.53130400 | 7.28608300 | -2.60264300 |
| C | -1.09572900 | 1.65977900 | 3.44957300  |
| H | -1.99036100 | 1.85487700 | 2.85678100  |
| H | -1.22067400 | 0.71521500 | 3.98890000  |
| H | -0.96468000 | 2.45949700 | 4.18866200  |

## INT2-1t

Cartesian coordinates

| ATOM | X           | Y           | Z           |
|------|-------------|-------------|-------------|
| Rh   | -0.60808470 | 0.93619909  | -0.41923924 |
| C    | -0.44232654 | 0.73668580  | -2.38955849 |
| O    | 0.28673678  | -0.09506371 | -2.86685185 |
| C    | -2.59093731 | 0.99134467  | -0.37760098 |
| C    | -3.79987496 | 1.16828761  | -0.28081494 |
| C    | -0.28148781 | -4.01091314 | -1.03234661 |
| C    | 3.22964148  | -1.00375323 | -0.40972144 |

|   |             |             |             |
|---|-------------|-------------|-------------|
| C | 4.23261492  | -1.89405055 | -0.80836241 |
| C | 5.39837104  | -1.34112346 | -1.34659431 |
| H | 6.20425848  | -1.98811199 | -1.67668315 |
| C | 5.54620854  | 0.04207416  | -1.45920695 |
| C | 4.52519701  | 0.89880934  | -1.05027792 |
| C | 3.32919396  | 0.38477982  | -0.52607460 |
| H | 0.20140002  | -5.93535143 | -1.85707267 |
| H | 2.63998918  | -5.61791671 | -1.67733427 |
| H | -1.34784768 | -4.17115497 | -1.12503145 |
| H | 6.46252361  | 0.45510233  | -1.87106015 |
| H | 4.65141661  | 1.96996071  | -1.15253831 |
| O | 2.05828986  | -1.48856465 | 0.13657945  |
| C | 3.99498828  | -3.38955992 | -0.57245647 |
| C | 4.88208782  | -4.26324492 | -1.47530167 |
| H | 4.71283683  | -5.32565674 | -1.27508729 |
| H | 4.69079051  | -4.07553035 | -2.53708649 |
| H | 5.94131652  | -4.07490850 | -1.27584030 |
| C | 4.32453750  | -3.71385862 | 0.91368548  |
| H | 3.71749737  | -3.11176897 | 1.59672464  |
| H | 4.13028929  | -4.77201309 | 1.12406810  |
| H | 5.38039084  | -3.50577399 | 1.12153482  |
| P | -0.92013103 | -1.41712652 | 0.00949203  |
| P | 1.88808906  | 1.43388068  | -0.01929007 |
| C | -2.52724222 | -2.08757428 | -0.60911185 |
| C | -3.43461319 | -2.74677136 | 0.22859077  |

|   |             |             |             |
|---|-------------|-------------|-------------|
| C | -2.80752845 | -1.99743163 | -1.98225936 |
| C | -4.60636897 | -3.30043000 | -0.29587051 |
| H | -3.23481229 | -2.82897501 | 1.29159887  |
| C | -3.97241640 | -2.55624486 | -2.50400780 |
| H | -2.10908894 | -1.49956742 | -2.64762761 |
| C | -4.87766742 | -3.20824116 | -1.66117982 |
| H | -5.30402485 | -3.80498915 | 0.36728091  |
| H | -4.17589467 | -2.47872805 | -3.56856568 |
| H | -5.78742977 | -3.64140779 | -2.06826318 |
| C | -1.01576408 | -1.57820926 | 1.84583345  |
| C | -1.81780696 | -0.66795716 | 2.55834421  |
| C | -0.30626216 | -2.55998998 | 2.55288675  |
| C | -1.90820393 | -0.74964137 | 3.94800871  |
| H | -2.38005896 | 0.09199697  | 2.02269483  |
| C | -0.39417957 | -2.63032745 | 3.94449676  |
| H | 0.31212221  | -3.27561186 | 2.02149269  |
| C | -1.19422430 | -1.72687539 | 4.64497322  |
| H | -2.53679922 | -0.04416015 | 4.48446052  |
| H | 0.16296379  | -3.39526127 | 4.47894606  |
| H | -1.26167682 | -1.78407792 | 5.72813008  |
| C | 2.12004321  | 1.59762350  | 1.81064226  |
| C | 1.11862947  | 2.23828500  | 2.56222486  |
| C | 3.24548459  | 1.08822556  | 2.47639566  |
| C | 1.24904912  | 2.36648967  | 3.94575014  |
| H | 0.25057340  | 2.65515572  | 2.06002253  |

|    |             |             |             |
|----|-------------|-------------|-------------|
| C  | 3.36708047  | 1.21326189  | 3.86177282  |
| H  | 4.03334474  | 0.59475108  | 1.91700092  |
| C  | 2.36981228  | 1.85153570  | 4.60014605  |
| H  | 0.46886248  | 2.86949358  | 4.51073827  |
| H  | 4.24497596  | 0.81186729  | 4.36156685  |
| H  | 2.46618443  | 1.94831901  | 5.67844648  |
| C  | 2.43065755  | 3.05862181  | -0.71147769 |
| C  | 2.97484611  | 4.07696574  | 0.07933806  |
| C  | 2.31885019  | 3.25717266  | -2.09700435 |
| C  | 3.39398897  | 5.27598956  | -0.50353956 |
| H  | 3.06563545  | 3.94211829  | 1.15201141  |
| C  | 2.74499328  | 4.45004127  | -2.67723665 |
| H  | 1.90018989  | 2.47626121  | -2.72615850 |
| C  | 3.28084959  | 5.46558977  | -1.88039757 |
| H  | 3.80707592  | 6.06146840  | 0.12386555  |
| H  | 2.65111598  | 4.59041314  | -3.75082095 |
| H  | 3.60535090  | 6.39931690  | -2.33194225 |
| C  | 0.59612925  | -5.00993115 | -1.44793246 |
| Cl | -0.77349909 | 3.35817757  | -0.27739359 |
| C  | 1.97519140  | -4.82835660 | -1.34386767 |
| C  | 2.50229957  | -3.65078593 | -0.80762271 |
| C  | 1.59201317  | -2.66412420 | -0.40634750 |
| C  | 0.20364654  | -2.79980402 | -0.51210545 |
| C  | -5.19512032 | 1.44088830  | -0.14084356 |
| C  | -5.63020632 | 2.73579895  | 0.21501867  |

|   |             |             |             |
|---|-------------|-------------|-------------|
| C | -6.16739636 | 0.44080008  | -0.34953167 |
| C | -6.98710997 | 3.01485482  | 0.35837273  |
| H | -4.88561207 | 3.51013206  | 0.37315506  |
| C | -7.52321898 | 0.72855339  | -0.20549701 |
| H | -5.84369317 | -0.55786423 | -0.62490959 |
| C | -7.94035221 | 2.01405275  | 0.14927939  |
| H | -7.30298450 | 4.01828483  | 0.63301475  |
| H | -8.25907143 | -0.05480959 | -0.37106034 |
| H | -8.99884878 | 2.23467031  | 0.26084920  |
| C | -1.27236097 | 1.70857381  | -3.20913812 |
| H | -1.06694433 | 1.54892822  | -4.27277897 |
| H | -2.32984119 | 1.54551858  | -2.98080515 |
| H | -1.04066552 | 2.73239206  | -2.90350885 |

### TS2-1t

Cartesian coordinates

| ATOM | X           | Y           | Z           |
|------|-------------|-------------|-------------|
| Rh   | 0.75354500  | 0.11041900  | -1.64057800 |
| C    | 0.92726100  | -0.82778800 | -3.24425100 |
| O    | 1.07965100  | -1.60622700 | -4.09099300 |
| C    | 0.27582900  | 0.97241700  | -3.76593600 |
| C    | -1.72093700 | -2.05740300 | 2.47109700  |
| C    | -0.66457200 | -1.55136100 | 1.71200600  |
| C    | 0.22030900  | -2.34746300 | 0.97531100  |
| C    | 0.03946900  | -3.73384100 | 1.02638300  |

|   |             |             |             |
|---|-------------|-------------|-------------|
| H | 0.71060000  | -4.38919200 | 0.48317100  |
| C | -1.01278800 | -4.27630600 | 1.76653700  |
| H | -1.15267000 | -5.35307200 | 1.79298400  |
| C | -1.88436500 | -3.44793600 | 2.47389700  |
| H | -2.69255200 | -3.89763600 | 3.04066800  |
| C | -1.84428500 | -0.85658600 | 4.66502000  |
| H | -0.82992700 | -0.47046100 | 4.52219700  |
| H | -1.77487100 | -1.80202400 | 5.21541200  |
| H | -2.40141500 | -0.13772600 | 5.27711900  |
| C | -3.97640400 | -1.62469600 | 3.56027300  |
| H | -4.55289000 | -0.93674700 | 4.18595400  |
| H | -3.93347600 | -2.57259600 | 4.10483700  |
| H | -4.52078800 | -1.78541600 | 2.62392600  |
| C | -0.77017900 | 3.42156600  | -1.22500900 |
| C | -1.83212900 | 3.03411000  | -2.06414000 |
| H | -2.18597300 | 2.00637100  | -2.04475800 |
| C | -2.43402000 | 3.95868200  | -2.91702400 |
| H | -3.25604400 | 3.64417400  | -3.55448500 |
| C | -1.97785300 | 5.27878900  | -2.95793100 |
| H | -2.44351900 | 5.99707700  | -3.62739800 |
| C | -0.91949800 | 5.66857400  | -2.13722900 |
| H | -0.55771400 | 6.69310100  | -2.16206100 |
| C | -0.32002900 | 4.74824600  | -1.27285600 |
| H | 0.49513800  | 5.07067300  | -0.63439700 |
| C | 1.17873000  | 3.06143700  | 0.91021200  |



|   |            |             |             |
|---|------------|-------------|-------------|
| C | 0.94198500 | 3.36511700  | 2.25932200  |
| H | 0.01870700 | 3.05131400  | 2.73467000  |
| C | 1.88683700 | 4.07602800  | 3.00163500  |
| H | 1.68919000 | 4.30031100  | 4.04660400  |
| C | 3.07398800 | 4.50256800  | 2.40480900  |
| H | 3.80500800 | 5.06226600  | 2.98257500  |
| C | 3.31861400 | 4.20436200  | 1.06224000  |
| H | 4.24261400 | 4.52649600  | 0.58936000  |
| C | 2.38429300 | 3.48074200  | 0.31952100  |
| H | 2.60179400 | 3.21853700  | -0.71091800 |
| C | 2.45836300 | -2.82085100 | -0.80911300 |
| C | 3.82795300 | -3.02881100 | -0.59306400 |
| H | 4.36757300 | -2.40723900 | 0.11280900  |
| C | 4.50707300 | -4.03124600 | -1.28859600 |
| H | 5.56975900 | -4.17708400 | -1.11486900 |
| C | 3.82807800 | -4.83936800 | -2.20064100 |
| H | 4.35887100 | -5.61900800 | -2.74035300 |
| C | 2.46415800 | -4.63693000 | -2.42421500 |
| H | 1.92926600 | -5.25479100 | -3.14016900 |
| C | 1.78496100 | -3.62850400 | -1.74195400 |
| H | 0.72856300 | -3.46858300 | -1.93626200 |
| C | 2.67035600 | -0.94572600 | 1.40915800  |
| C | 3.47568200 | 0.19483300  | 1.29156400  |
| H | 3.44140600 | 0.78734400  | 0.38526900  |
| C | 4.33619700 | 0.55778300  | 2.33101200  |

|    |             |             |             |
|----|-------------|-------------|-------------|
| H  | 4.94479900  | 1.45144400  | 2.22730700  |
| C  | 4.40665900  | -0.21142100 | 3.49184300  |
| H  | 5.07563800  | 0.07544900  | 4.29917200  |
| C  | 3.61297100  | -1.35468700 | 3.61275400  |
| H  | 3.66278300  | -1.96338300 | 4.51190700  |
| C  | 2.74973200  | -1.72010500 | 2.58079200  |
| H  | 2.13737600  | -2.60910700 | 2.69120500  |
| O  | -0.42577800 | -0.19671600 | 1.66499700  |
| P  | -0.03284300 | 2.12618100  | -0.12349700 |
| P  | 1.54142400  | -1.46424000 | 0.03633100  |
| C  | -1.45065600 | 1.83026000  | 1.03410300  |
| H  | -2.49907900 | 3.67476400  | 0.65071400  |
| C  | -3.60426100 | 2.41356500  | 1.99373900  |
| C  | -2.51479300 | 2.73114100  | 1.18399600  |
| H  | -4.42244000 | 3.12011300  | 2.09977900  |
| C  | -3.65605400 | 1.18629200  | 2.65739600  |
| H  | -4.52385400 | 0.95372300  | 3.26540300  |
| C  | -2.60768300 | 0.26595400  | 2.55582600  |
| C  | -1.51582100 | 0.63375000  | 1.75972700  |
| C  | -2.26055300 | -0.99408500 | -1.46473000 |
| Cl | 3.04390200  | 1.00224700  | -2.04821700 |
| C  | -3.60206500 | -1.48541900 | -1.41939700 |
| C  | -4.60118200 | -0.80572800 | -0.69063600 |
| C  | -3.96186300 | -2.66603200 | -2.10207000 |
| C  | -5.90602800 | -1.29358100 | -0.64710300 |

|   |             |             |             |
|---|-------------|-------------|-------------|
| H | -4.33946600 | 0.10682600  | -0.16429000 |
| C | -5.26821000 | -3.14767300 | -2.05426000 |
| H | -3.20189200 | -3.19632100 | -2.66834600 |
| C | -6.24729300 | -2.46609900 | -1.32672800 |
| H | -6.66209100 | -0.75247400 | -0.08311600 |
| H | -5.52371400 | -4.05926100 | -2.58880400 |
| H | -7.26607700 | -2.84294000 | -1.29246400 |
| C | -1.11070400 | -0.57333600 | -1.47843500 |
| C | -2.56053000 | -1.07624700 | 3.30163800  |
| H | 0.11964400  | 1.91652300  | -3.24880900 |
| H | 1.10584200  | 1.07841400  | -4.46310200 |
| H | -0.64810400 | 0.62559200  | -4.22625200 |

### INT3-1t

Cartesian coordinates

| ATOM | X           | Y           | Z           |
|------|-------------|-------------|-------------|
| Rh   | -0.63234600 | 0.40366400  | -1.74570200 |
| C    | 0.08501000  | 1.51603200  | -3.09764100 |
| O    | 0.45639900  | 2.13481100  | -3.98514400 |
| C    | 2.20746100  | -1.91084400 | 3.17335300  |
| C    | 2.46780300  | -0.49933900 | 2.62790000  |
| C    | 1.50275500  | 0.12590300  | 1.82846300  |
| C    | 1.65082200  | 1.41910500  | 1.30738500  |
| C    | 2.80097300  | 2.13447700  | 1.66983800  |
| H    | 2.94732200  | 3.14095500  | 1.29438400  |

|   |             |             |             |
|---|-------------|-------------|-------------|
| C | 3.76782100  | 1.55534400  | 2.48844000  |
| H | 4.65523600  | 2.11903800  | 2.76117200  |
| C | 3.60659900  | 0.24797300  | 2.94674900  |
| H | 4.38023200  | -0.18746000 | 3.57015900  |
| C | 1.54970800  | -1.78130200 | 4.57660300  |
| H | 0.61087000  | -1.22042700 | 4.52204600  |
| H | 2.22147800  | -1.25733000 | 5.26648300  |
| H | 1.33110100  | -2.77269900 | 4.99020300  |
| C | 3.52352700  | -2.70649800 | 3.30160900  |
| H | 3.34055400  | -3.69880900 | 3.72427400  |
| H | 4.22001600  | -2.20759000 | 3.98143100  |
| H | 4.01085300  | -2.82709800 | 2.32885200  |
| C | -2.96595100 | -2.36775700 | -1.12567900 |
| C | -2.50152100 | -3.36732900 | -1.99964800 |
| H | -1.43612500 | -3.53237000 | -2.12274000 |
| C | -3.39834100 | -4.15723100 | -2.71881800 |
| H | -3.01932100 | -4.92972300 | -3.38243200 |
| C | -4.77331800 | -3.94768900 | -2.59593800 |
| H | -5.47148300 | -4.55928400 | -3.16099700 |
| C | -5.24415700 | -2.94331000 | -1.75025200 |
| H | -6.31174700 | -2.76537400 | -1.65445000 |
| C | -4.34958300 | -2.15961200 | -1.01891300 |
| H | -4.73352500 | -1.38382700 | -0.36607600 |
| C | -2.81179200 | -0.64862200 | 1.19049900  |
| C | -3.09537800 | -1.49244700 | 2.27929300  |

|   |             |             |             |
|---|-------------|-------------|-------------|
| H | -2.69369800 | -2.50022500 | 2.30986200  |
| C | -3.89236800 | -1.04449900 | 3.33136900  |
| H | -4.10196900 | -1.70791700 | 4.16650800  |
| C | -4.41725600 | 0.25046200  | 3.31215900  |
| H | -5.03569600 | 0.59990300  | 4.13497200  |
| C | -4.14470400 | 1.08959800  | 2.23294700  |
| H | -4.54213000 | 2.10003300  | 2.20893400  |
| C | -3.34697200 | 0.64536600  | 1.17432300  |
| H | -3.15633800 | 1.29540700  | 0.32880300  |
| C | 1.42913500  | 3.33894100  | -0.77183200 |
| C | 1.18927100  | 4.71904100  | -0.73640800 |
| H | 0.37235300  | 5.11611800  | -0.14390400 |
| C | 2.00048600  | 5.59786800  | -1.46054300 |
| H | 1.79787800  | 6.66502600  | -1.42420300 |
| C | 3.06432100  | 5.11186600  | -2.21954400 |
| H | 3.69428400  | 5.79714500  | -2.78026300 |
| C | 3.31367000  | 3.73725100  | -2.25736600 |
| H | 4.13872000  | 3.34812100  | -2.84810800 |
| C | 2.50133900  | 2.85672200  | -1.54538800 |
| H | 2.69755300  | 1.78811100  | -1.58872900 |
| C | -0.70335500 | 3.13233800  | 1.19306300  |
| C | -1.79159900 | 3.79130800  | 0.59267600  |
| H | -1.99911200 | 3.64683100  | -0.46335900 |
| C | -2.62813900 | 4.60824300  | 1.35510800  |
| H | -3.46003400 | 5.11678500  | 0.87498200  |

|    |             |             |             |
|----|-------------|-------------|-------------|
| C  | -2.40517300 | 4.76245200  | 2.72565000  |
| H  | -3.06056000 | 5.39553000  | 3.31821700  |
| C  | -1.33881200 | 4.09614100  | 3.33119900  |
| H  | -1.16084600 | 4.20615800  | 4.39778400  |
| C  | -0.48949900 | 3.29011700  | 2.57064800  |
| H  | 0.34187900  | 2.78718500  | 3.05314000  |
| O  | 0.32591300  | -0.51233100 | 1.52513700  |
| P  | -1.78524200 | -1.27133500 | -0.22201200 |
| P  | 0.38997700  | 2.09152800  | 0.12892100  |
| C  | -0.67277200 | -2.45174400 | 0.66987200  |
| H  | -1.54641700 | -4.33030900 | 0.06777400  |
| C  | 0.11539400  | -4.62725900 | 1.39469200  |
| C  | -0.77388000 | -3.84679000 | 0.65301400  |
| H  | 0.03021300  | -5.70984100 | 1.37113100  |
| C  | 1.10190300  | -4.02534900 | 2.17408200  |
| H  | 1.77427700  | -4.65430400 | 2.74778400  |
| C  | 1.22098000  | -2.63143000 | 2.24484600  |
| C  | 0.31943000  | -1.88378000 | 1.48359700  |
| C  | 2.12368300  | -1.25010400 | -1.62204700 |
| Cl | -2.75864300 | 1.66700600  | -2.09591900 |
| C  | 3.34625200  | -1.98886700 | -1.57611000 |
| C  | 3.39623800  | -3.27074700 | -0.98763200 |
| C  | 4.53698000  | -1.45841300 | -2.11504800 |
| C  | 4.59140600  | -3.98597700 | -0.93833800 |
| H  | 2.48628500  | -3.69449400 | -0.57455600 |

|   |             |             |             |
|---|-------------|-------------|-------------|
| C | 5.72835200  | -2.17863700 | -2.06219400 |
| H | 4.51200700  | -0.47575000 | -2.57701000 |
| C | 5.76391500  | -3.44502200 | -1.47298700 |
| H | 4.60650800  | -4.97371600 | -0.48374100 |
| H | 6.63373200  | -1.74965900 | -2.48447300 |
| H | 6.69410000  | -4.00566600 | -1.43433300 |
| C | 1.06922000  | -0.62721400 | -1.62866400 |
| C | -1.20320200 | -0.79691700 | -3.40477200 |
| H | -0.65419800 | -1.73520900 | -3.34905000 |
| H | -2.27875600 | -0.92658600 | -3.31287200 |
| H | -0.97256300 | -0.29429000 | -4.34565500 |

#### INT4-1t

Cartesian coordinates

| ATOM | X           | Y           | Z           |
|------|-------------|-------------|-------------|
| Rh   | -0.59299600 | 1.25973100  | -0.40033700 |
| C    | -0.61275500 | 3.07344700  | -1.50419900 |
| C    | -0.52384800 | 0.39173200  | -2.04951700 |
| O    | -0.54730700 | -0.11686300 | -3.07950000 |
| C    | -1.04766600 | -3.80767000 | -0.42524300 |
| C    | 2.46166100  | -0.90648200 | -1.61464300 |
| C    | 2.94225900  | -1.73710600 | -2.63046500 |
| C    | 3.62433100  | -1.11787700 | -3.68433000 |
| H    | 4.00473200  | -1.71288600 | -4.50768900 |
| C    | 3.82317300  | 0.26335800  | -3.69656200 |

|   |             |             |             |
|---|-------------|-------------|-------------|
| C | 3.37750000  | 1.05488200  | -2.63651900 |
| C | 2.69729600  | 0.47595300  | -1.55713600 |
| H | -1.20719800 | -5.66970800 | -1.48913300 |
| H | 0.90234500  | -5.36827200 | -2.72553700 |
| H | -1.99443200 | -3.93928700 | 0.08512800  |
| H | 4.34144100  | 0.72583800  | -4.53145100 |
| H | 3.55200500  | 2.12465300  | -2.65466400 |
| O | 1.69772500  | -1.42783100 | -0.59076200 |
| C | 2.75391600  | -3.25069800 | -2.46728400 |
| C | 2.87120800  | -3.99000400 | -3.81147000 |
| H | 2.76946500  | -5.07033600 | -3.67248900 |
| H | 2.10888200  | -3.65952500 | -4.52479300 |
| H | 3.85712900  | -3.82732600 | -4.25752800 |
| C | 3.86291700  | -3.77615000 | -1.50993100 |
| H | 3.81667900  | -3.27747400 | -0.53663100 |
| H | 3.74359900  | -4.85344500 | -1.34705300 |
| H | 4.85493200  | -3.59665100 | -1.94050900 |
| P | -0.92017500 | -1.22411300 | 0.83121400  |
| P | 1.95319300  | 1.38311600  | -0.13084800 |
| C | -2.69296900 | -1.71083800 | 1.05478600  |
| C | -3.21589000 | -2.15272600 | 2.27919800  |
| C | -3.54936300 | -1.63998500 | -0.05731300 |
| C | -4.56200700 | -2.51040400 | 2.38828900  |
| H | -2.57879000 | -2.22027300 | 3.15332300  |
| C | -4.89033200 | -2.00475800 | 0.05234300  |



|   |             |             |             |
|---|-------------|-------------|-------------|
| H | -3.17385100 | -1.28889000 | -1.01116000 |
| C | -5.40203000 | -2.43779500 | 1.27742400  |
| H | -4.94935100 | -2.84741700 | 3.34626800  |
| H | -5.53802200 | -1.92913200 | -0.81628800 |
| H | -6.45002500 | -2.71183800 | 1.36490300  |
| C | -0.20773700 | -1.52287300 | 2.50457600  |
| C | -0.51200500 | -0.59996200 | 3.52114000  |
| C | 0.56664600  | -2.64954800 | 2.81477600  |
| C | -0.07443300 | -0.82459200 | 4.82667200  |
| H | -1.08292500 | 0.29388600  | 3.28806400  |
| C | 1.02040400  | -2.85722200 | 4.11888100  |
| H | 0.80822200  | -3.37412100 | 2.04363100  |
| C | 0.69298200  | -1.95190300 | 5.12916500  |
| H | -0.32828700 | -0.11057400 | 5.60581500  |
| H | 1.62101200  | -3.73450300 | 4.34487200  |
| H | 1.03618200  | -2.12245200 | 6.14632300  |
| C | 2.83551700  | 0.68570900  | 1.34098900  |
| C | 2.38875900  | 1.06918000  | 2.61409200  |
| C | 3.99441700  | -0.09640600 | 1.22834200  |
| C | 3.09687000  | 0.67797600  | 3.75140400  |
| H | 1.48810700  | 1.66810100  | 2.71125900  |
| C | 4.69397600  | -0.48981900 | 2.37002400  |
| H | 4.36325900  | -0.39570600 | 0.25240900  |
| C | 4.24851400  | -0.10125700 | 3.63434500  |
| H | 2.73938000  | 0.97954200  | 4.73164800  |

|    |             |             |             |
|----|-------------|-------------|-------------|
| H  | 5.59037900  | -1.09633100 | 2.26805500  |
| H  | 4.79638800  | -0.40419700 | 4.52279300  |
| C  | 2.74193700  | 3.05940800  | -0.15589600 |
| C  | 1.98804500  | 4.18836200  | 0.19520400  |
| C  | 4.12286700  | 3.20880300  | -0.37936900 |
| C  | 2.59455500  | 5.44491600  | 0.27648000  |
| H  | 0.93833300  | 4.08031500  | 0.44017100  |
| C  | 4.72181700  | 4.46522100  | -0.30647900 |
| H  | 4.73868600  | 2.34129400  | -0.59507400 |
| C  | 3.95610100  | 5.58936800  | 0.01437600  |
| H  | 1.99548900  | 6.30854300  | 0.55192500  |
| H  | 5.78877800  | 4.56379400  | -0.48841100 |
| H  | 4.42428900  | 6.56829400  | 0.07471200  |
| C  | -0.60761100 | -4.77960000 | -1.32197900 |
| Cl | -0.85099700 | 2.49772800  | 1.69337200  |
| C  | 0.58993200  | -4.60907400 | -2.01675600 |
| C  | 1.39030600  | -3.48280100 | -1.80208700 |
| C  | 0.93004800  | -2.53907300 | -0.87496500 |
| C  | -0.29554800 | -2.64455000 | -0.19759000 |
| C  | -5.16474700 | 1.69415200  | -1.06684800 |
| C  | -5.77269500 | 1.36055000  | -2.29531400 |
| C  | -5.98315900 | 2.18529200  | -0.02804700 |
| C  | -7.14607100 | 1.51293600  | -2.47530100 |
| H  | -5.15161400 | 0.98593900  | -3.10417300 |
| C  | -7.35501500 | 2.33651700  | -0.21543300 |

|   |             |            |             |
|---|-------------|------------|-------------|
| H | -5.52298000 | 2.44435600 | 0.92052200  |
| C | -7.94439600 | 2.00128800 | -1.43773200 |
| H | -7.59492800 | 1.25200500 | -3.43070500 |
| H | -7.96824800 | 2.71825000 | 0.59716900  |
| H | -9.01515100 | 2.12106500 | -1.58077300 |
| C | -2.56700400 | 1.37775900 | -0.65882700 |
| C | -3.75939500 | 1.53408200 | -0.87450100 |
| H | -0.93968400 | 3.82606400 | -0.78936500 |
| H | 0.38899900  | 3.28012300 | -1.88377000 |
| H | -1.32772800 | 2.99317500 | -2.32194500 |

### TS3-1t

Cartesian coordinates

| ATOM | X           | Y           | Z           |
|------|-------------|-------------|-------------|
| Rh   | -0.66740300 | 1.15957700  | -0.07502800 |
| C    | -2.55108000 | 1.73983600  | -0.44891900 |
| C    | -3.76593200 | 1.71053500  | -0.65570200 |
| C    | -1.45570300 | 3.31340200  | -0.57929600 |
| C    | -1.05242900 | -3.65727400 | -1.08032600 |
| C    | 2.61349400  | -0.74295500 | -1.57118900 |
| C    | 3.20061300  | -1.46032800 | -2.61882700 |
| C    | 4.07029800  | -0.75769600 | -3.46033700 |
| H    | 4.54787100  | -1.26596800 | -4.29095300 |
| C    | 4.34898800  | 0.59177400  | -3.24078100 |
| C    | 3.75543600  | 1.27270900  | -2.17772600 |

|   |             |             |             |
|---|-------------|-------------|-------------|
| C | 2.85658100  | 0.61703100  | -1.32560400 |
| H | -1.20250300 | -5.29741200 | -2.46363000 |
| H | 1.01015300  | -4.90881000 | -3.47036500 |
| H | -2.03094600 | -3.83651900 | -0.65025700 |
| H | 5.03717100  | 1.11445000  | -3.89889600 |
| H | 3.98139100  | 2.32084500  | -2.01699800 |
| O | 1.74721400  | -1.36882300 | -0.70097800 |
| C | 2.92129800  | -2.96581100 | -2.71694400 |
| C | 3.13215000  | -3.49338200 | -4.14743200 |
| H | 2.96406100  | -4.57339200 | -4.19287900 |
| H | 2.45913300  | -3.00746000 | -4.86158300 |
| H | 4.16284300  | -3.32752300 | -4.47469200 |
| C | 3.90319400  | -3.70453500 | -1.76165300 |
| H | 3.79220900  | -3.35409900 | -0.73065400 |
| H | 3.71078100  | -4.78352700 | -1.77904200 |
| H | 4.94011100  | -3.52988400 | -2.07131000 |
| P | -0.86778800 | -1.37876400 | 0.66436000  |
| P | 1.94900300  | 1.41296400  | 0.08034400  |
| C | -2.62422200 | -1.89939300 | 0.88430400  |
| C | -3.07628800 | -2.64656200 | 1.98358700  |
| C | -3.54585200 | -1.53233500 | -0.11086700 |
| C | -4.41867400 | -3.01669900 | 2.08191700  |
| H | -2.38370200 | -2.94273300 | 2.76338800  |
| C | -4.88548500 | -1.90980400 | -0.01264200 |
| H | -3.21969400 | -0.94107900 | -0.95841900 |

|   |             |             |             |
|---|-------------|-------------|-------------|
| C | -5.32555400 | -2.65016800 | 1.08584400  |
| H | -4.75301000 | -3.59512400 | 2.93932300  |
| H | -5.58493400 | -1.60514100 | -0.78553100 |
| H | -6.37099500 | -2.93585600 | 1.16738300  |
| C | -0.05032400 | -1.95154200 | 2.21700100  |
| C | -0.37729700 | -1.30019200 | 3.42020800  |
| C | 0.86719300  | -3.01221100 | 2.24771400  |
| C | 0.18907500  | -1.71919900 | 4.62423600  |
| H | -1.06251100 | -0.45931700 | 3.40914900  |
| C | 1.44225800  | -3.41713300 | 3.45382500  |
| H | 1.12764500  | -3.53605000 | 1.33418700  |
| C | 1.10183800  | -2.77616100 | 4.64548800  |
| H | -0.08135200 | -1.21146900 | 5.54645800  |
| H | 2.15086600  | -4.24133600 | 3.45963100  |
| H | 1.54485600  | -3.09789600 | 5.58445500  |
| C | 2.95637500  | 0.88326300  | 1.53754000  |
| C | 2.38823800  | 0.94285500  | 2.81920300  |
| C | 4.29187600  | 0.46901100  | 1.39936200  |
| C | 3.14900400  | 0.60002400  | 3.93943200  |
| H | 1.35584100  | 1.25698200  | 2.93609900  |
| C | 5.04370700  | 0.12217700  | 2.52181300  |
| H | 4.74907300  | 0.41821500  | 0.41634300  |
| C | 4.47430400  | 0.18884300  | 3.79540500  |
| H | 2.69558900  | 0.64748800  | 4.92547900  |
| H | 6.07533500  | -0.19803200 | 2.39980500  |

|    |             |             |             |
|----|-------------|-------------|-------------|
| H  | 5.06146500  | -0.08080200 | 4.66957700  |
| C  | 2.39390200  | 3.19600800  | -0.11858100 |
| C  | 1.95182000  | 3.88238000  | -1.26473800 |
| C  | 3.08984100  | 3.91309400  | 0.86556700  |
| C  | 2.22312300  | 5.24029800  | -1.43310800 |
| H  | 1.40314800  | 3.34981900  | -2.03758100 |
| C  | 3.34716800  | 5.27613000  | 0.70162900  |
| H  | 3.43300900  | 3.40918300  | 1.76245900  |
| C  | 2.92025700  | 5.94244500  | -0.44735600 |
| H  | 1.88139900  | 5.74989400  | -2.33005300 |
| H  | 3.88632100  | 5.81518400  | 1.47604600  |
| H  | 3.12391100  | 7.00238500  | -0.57284100 |
| C  | -0.58565700 | -4.47802200 | -2.10593400 |
| Cl | -0.96557300 | 1.92312900  | 2.22854500  |
| C  | 0.66916000  | -4.25597700 | -2.67398400 |
| C  | 1.49009900  | -3.21707400 | -2.22217900 |
| C  | 0.98609200  | -2.40728700 | -1.19760200 |
| C  | -0.27646200 | -2.58752800 | -0.61123100 |
| C  | -5.16813100 | 1.70073200  | -0.86149100 |
| C  | -5.71576100 | 1.48763400  | -2.14826900 |
| C  | -6.05974300 | 1.89892700  | 0.21871600  |
| C  | -7.09450400 | 1.47374400  | -2.34141300 |
| H  | -5.04223900 | 1.33550900  | -2.98698800 |
| C  | -7.43605800 | 1.88786000  | 0.01391500  |
| H  | -5.64963900 | 2.05835400  | 1.21120500  |

|   |             |            |             |
|---|-------------|------------|-------------|
| C | -7.96281800 | 1.67453100 | -1.26403100 |
| H | -7.49473200 | 1.30864600 | -3.33879300 |
| H | -8.10400500 | 2.04424000 | 0.85733600  |
| H | -9.03839400 | 1.66544200 | -1.41878900 |
| C | -0.51418100 | 0.67062200 | -1.85650600 |
| O | -0.45519000 | 0.37813000 | -2.97078900 |
| H | -1.72873000 | 3.55679500 | -1.60349800 |
| H | -2.05711700 | 3.83136200 | 0.16100100  |
| H | -0.40758900 | 3.56341700 | -0.40322800 |

### INT5-1t

Cartesian coordinates

| ATOM | X           | Y           | Z           |
|------|-------------|-------------|-------------|
| Rh   | -0.72592600 | 1.17622900  | -0.24145400 |
| C    | -1.30199200 | 3.14038100  | -0.91738300 |
| C    | -2.37784100 | 2.47950900  | -0.91989400 |
| O    | -0.27816900 | 0.31679200  | -3.07887700 |
| C    | -1.61697000 | -3.44049500 | -1.31954000 |
| C    | 2.52135500  | -1.19336700 | -1.25036200 |
| C    | 3.14526200  | -2.04411700 | -2.17231800 |
| C    | 4.27013800  | -1.54819000 | -2.83847300 |
| H    | 4.78652900  | -2.16860700 | -3.56279100 |
| C    | 4.75472400  | -0.26732900 | -2.57311200 |
| C    | 4.10461100  | 0.55523100  | -1.65478300 |
| C    | 2.94988500  | 0.11786300  | -0.98797800 |

|   |             |             |             |
|---|-------------|-------------|-------------|
| H | -1.84526500 | -5.03876100 | -2.74229800 |
| H | 0.52643000  | -5.05860100 | -3.40029200 |
| H | -2.66152400 | -3.45238100 | -1.03005200 |
| H | 5.64285100  | 0.09168800  | -3.08532000 |
| H | 4.48822900  | 1.55107200  | -1.46626500 |
| O | 1.43239800  | -1.63501800 | -0.53300800 |
| C | 2.61514500  | -3.47553600 | -2.32935300 |
| C | 2.95611300  | -4.06168200 | -3.71159200 |
| H | 2.59506500  | -5.09094000 | -3.79703300 |
| H | 2.51447100  | -3.47129500 | -4.52124000 |
| H | 4.03896000  | -4.10148700 | -3.86267300 |
| C | 3.27543700  | -4.36177200 | -1.23333300 |
| H | 3.05958900  | -3.97825100 | -0.23112500 |
| H | 2.89703300  | -5.38875400 | -1.29527500 |
| H | 4.36362500  | -4.38222500 | -1.36416900 |
| P | -1.24902500 | -1.23843300 | 0.51588400  |
| P | 1.95646400  | 1.17372000  | 0.17795500  |
| C | -3.05998500 | -1.58716800 | 0.66894900  |
| C | -3.60448400 | -2.34963900 | 1.71338500  |
| C | -3.91825200 | -1.09367100 | -0.32579400 |
| C | -4.97558700 | -2.61217600 | 1.75711700  |
| H | -2.96168100 | -2.74034000 | 2.49445000  |
| C | -5.28511900 | -1.36888900 | -0.28876400 |
| H | -3.51905400 | -0.48377800 | -1.12962600 |
| C | -5.81799200 | -2.12708800 | 0.75584800  |



|   |             |             |             |
|---|-------------|-------------|-------------|
| H | -5.38240500 | -3.19963400 | 2.57622600  |
| H | -5.93146000 | -0.96951600 | -1.06460100 |
| H | -6.88465400 | -2.33283400 | 0.79250200  |
| C | -0.56860700 | -1.94000500 | 2.08963500  |
| C | -0.64047000 | -1.16297300 | 3.25746500  |
| C | -0.03420600 | -3.23591600 | 2.16906600  |
| C | -0.19387700 | -1.67906900 | 4.47509700  |
| H | -1.03532200 | -0.15336100 | 3.20682500  |
| C | 0.42173600  | -3.74205900 | 3.38747400  |
| H | 0.02087600  | -3.86019500 | 1.28351900  |
| C | 0.34067600  | -2.96631000 | 4.54489000  |
| H | -0.25813500 | -1.06530500 | 5.36965200  |
| H | 0.83434600  | -4.74692800 | 3.43018500  |
| H | 0.69243000  | -3.36295900 | 5.49386000  |
| C | 2.70798800  | 0.76295300  | 1.81924000  |
| C | 2.05223800  | 1.19986700  | 2.98218800  |
| C | 3.92237100  | 0.06854300  | 1.94195200  |
| C | 2.61532300  | 0.96258900  | 4.23803500  |
| H | 1.09826700  | 1.71257000  | 2.90265900  |
| C | 4.47179100  | -0.17848700 | 3.20065800  |
| H | 4.44570000  | -0.27748800 | 1.05666100  |
| C | 3.82308100  | 0.27279200  | 4.35173900  |
| H | 2.09913700  | 1.31137500  | 5.12863700  |
| H | 5.41103300  | -0.72012400 | 3.27957600  |
| H | 4.25534600  | 0.08370800  | 5.33105000  |

|    |             |             |             |
|----|-------------|-------------|-------------|
| C  | 2.65906100  | 2.85329800  | -0.18181000 |
| C  | 2.58709900  | 3.35779800  | -1.49294400 |
| C  | 3.21101500  | 3.66748700  | 0.81727000  |
| C  | 3.07723900  | 4.62649200  | -1.79896400 |
| H  | 2.15401000  | 2.75125800  | -2.28432600 |
| C  | 3.68209300  | 4.94792800  | 0.51316200  |
| H  | 3.27842200  | 3.30499400  | 1.83726700  |
| C  | 3.62337200  | 5.42975900  | -0.79401400 |
| H  | 3.02460200  | 4.99108200  | -2.82168900 |
| H  | 4.10304700  | 5.56370900  | 1.30363000  |
| H  | 3.99743600  | 6.42234700  | -1.02996400 |
| C  | -1.15500600 | -4.33553600 | -2.28513700 |
| Cl | -1.25176200 | 2.05157400  | 2.01952900  |
| C  | 0.18926200  | -4.34323300 | -2.65769600 |
| C  | 1.10235000  | -3.45505500 | -2.07754600 |
| C  | 0.59759800  | -2.55159300 | -1.13708300 |
| C  | -0.74396500 | -2.51740700 | -0.72974400 |
| C  | -3.81170100 | 2.33370400  | -1.00928000 |
| C  | -4.45066200 | 2.19160500  | -2.25579500 |
| C  | -4.59669000 | 2.38330300  | 0.15975200  |
| H  | -3.84873700 | 2.15174400  | -3.15946200 |
| C  | -5.98524100 | 2.31624700  | 0.07418200  |
| H  | -4.09501400 | 2.47348100  | 1.11820000  |
| C  | -6.61337500 | 2.18565200  | -1.16833300 |
| H  | -6.58080300 | 2.36419300  | 0.98206700  |

|   |             |            |             |
|---|-------------|------------|-------------|
| H | -7.69747800 | 2.13629500 | -1.23001100 |
| C | -0.44759000 | 0.63049500 | -1.97856200 |
| C | -0.61666300 | 4.44538800 | -1.01160300 |
| H | 0.09743400  | 4.47582700 | -1.83981400 |
| H | -1.35456000 | 5.24417300 | -1.16196400 |
| H | -0.06057400 | 4.65269400 | -0.09148100 |
| C | -5.84137400 | 2.11857700 | -2.33150300 |
| H | -6.32287900 | 2.01876900 | -3.30106000 |

## 5. Coordinates of radical structures in figure 4

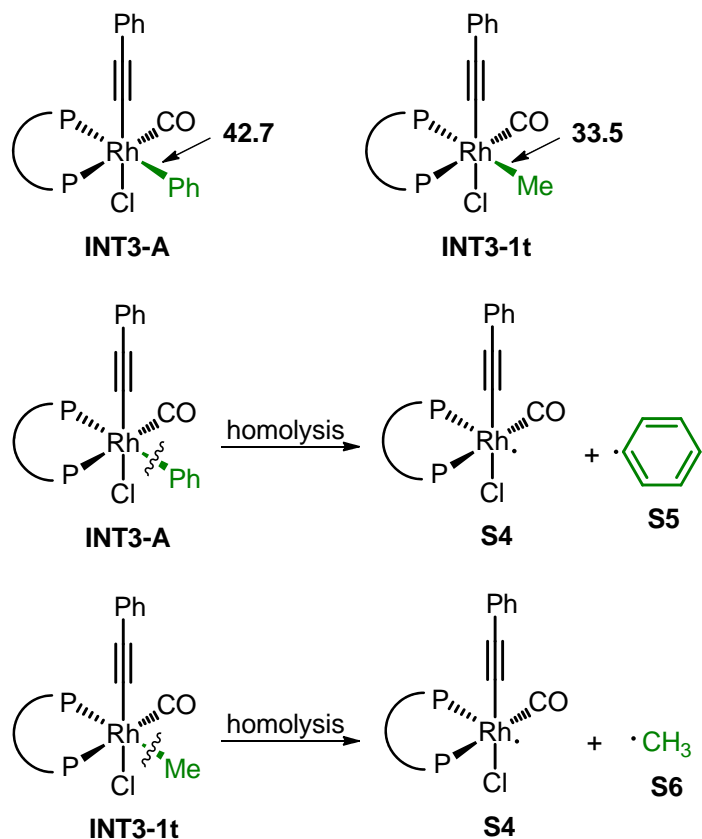

Figure S5

### S4

|                                              |                             |
|----------------------------------------------|-----------------------------|
| Zero-point correction=                       | 0.709621 (Hartree/Particle) |
| Thermal correction to Energy=                | 0.758919                    |
| Thermal correction to Enthalpy=              | 0.759863                    |
| Thermal correction to Gibbs Free Energy=     | 0.620727                    |
| Sum of electronic and zero-point Energies=   | -3253.548765                |
| Sum of electronic and thermal Energies=      | -3253.499467                |
| Sum of electronic and thermal Enthalpies=    | -3253.498523                |
| Sum of electronic and thermal Free Energies= | -3253.637660                |

Cartesian coordinates

| ATOM | X           | Y           | Z           |
|------|-------------|-------------|-------------|
| Rh   | -0.69180400 | 0.00063200  | -1.64704200 |
| C    | -0.63167500 | 1.15226200  | -3.18703200 |
| O    | -0.59482600 | 1.75916500  | -4.15742800 |
| C    | 2.52510100  | -0.10152400 | 3.49394400  |
| C    | 1.98277700  | 1.17295400  | 2.83011200  |
| C    | 0.89313900  | 1.05691600  | 1.95852600  |
| C    | 0.29473700  | 2.14885300  | 1.31554400  |
| C    | 0.79298200  | 3.42524800  | 1.61743600  |
| H    | 0.35254300  | 4.29887500  | 1.15095900  |
| C    | 1.86748700  | 3.57807000  | 2.49150000  |
| H    | 2.24831500  | 4.57163500  | 2.70931100  |
| C    | 2.46449100  | 2.46172300  | 3.07883100  |
| H    | 3.31001800  | 2.60535000  | 3.74286200  |
| C    | 1.66079700  | -0.40568000 | 4.75149700  |
| H    | 0.60601900  | -0.52986000 | 4.48720300  |
| H    | 1.73848200  | 0.41452500  | 5.47462100  |
| H    | 2.00337500  | -1.32861000 | 5.23341500  |
| C    | 3.99355400  | 0.06058100  | 3.92474800  |
| H    | 4.35315400  | -0.84616500 | 4.42065100  |
| H    | 4.10026500  | 0.87206700  | 4.65071600  |
| H    | 4.64356600  | 0.27055200  | 3.06895400  |
| C    | -0.45087000 | -3.41118900 | -1.51746400 |
| C    | 0.55161400  | -3.32482200 | -2.50096300 |

|   |             |             |             |
|---|-------------|-------------|-------------|
| H | 1.24321400  | -2.48610800 | -2.49646400 |
| C | 0.65858500  | -4.30896500 | -3.48262000 |
| H | 1.43857400  | -4.23376300 | -4.23545700 |
| C | -0.24022000 | -5.37886100 | -3.50575700 |
| H | -0.16172500 | -6.13981400 | -4.27763800 |
| C | -1.24305000 | -5.46326500 | -2.53954000 |
| H | -1.94895400 | -6.28931800 | -2.55604500 |
| C | -1.34951600 | -4.48591700 | -1.54721800 |
| H | -2.13551900 | -4.55876400 | -0.80297700 |
| C | -1.91001200 | -2.56118400 | 0.88511800  |
| C | -1.64516700 | -3.47182500 | 1.92325700  |
| H | -0.64623100 | -3.87508600 | 2.05469700  |
| C | -2.66011700 | -3.86217900 | 2.79642900  |
| H | -2.44075400 | -4.56636200 | 3.59480700  |
| C | -3.95002300 | -3.34702100 | 2.64766900  |
| H | -4.73907600 | -3.64863600 | 3.33177100  |
| C | -4.21956800 | -2.44453900 | 1.61890000  |
| H | -5.21884600 | -2.03605900 | 1.49690600  |
| C | -3.20808200 | -2.05098500 | 0.73984400  |
| H | -3.42671000 | -1.36237900 | -0.06819300 |
| C | -1.08615800 | 3.47885100  | -0.81088500 |
| C | -2.18578900 | 4.34725500  | -0.77675900 |
| H | -3.06031900 | 4.09533300  | -0.18680600 |
| C | -2.16384500 | 5.54176100  | -1.50185800 |
| H | -3.02535300 | 6.20337000  | -1.46910800 |

|   |             |             |             |
|---|-------------|-------------|-------------|
| C | -1.04465700 | 5.88563000  | -2.25981500 |
| H | -1.03077700 | 6.81501500  | -2.82267600 |
| C | 0.05799100  | 5.02725300  | -2.29531000 |
| H | 0.93306200  | 5.28612400  | -2.88523900 |
| C | 0.03714300  | 3.82997700  | -1.58267500 |
| H | 0.89568100  | 3.16379300  | -1.62043300 |
| C | -2.59361700 | 1.84384600  | 1.08054700  |
| C | -3.81059700 | 1.56008200  | 0.43609200  |
| H | -3.82056100 | 1.31074400  | -0.62098500 |
| C | -5.00520800 | 1.56712500  | 1.15748600  |
| H | -5.93924900 | 1.35255000  | 0.64505900  |
| C | -5.00008100 | 1.83490500  | 2.52828800  |
| H | -5.93123600 | 1.83262500  | 3.08886400  |
| C | -3.79305500 | 2.10077600  | 3.17695300  |
| H | -3.77996500 | 2.30702200  | 4.24397900  |
| C | -2.59616000 | 2.11009700  | 2.45889000  |
| H | -1.66640700 | 2.33021100  | 2.97291600  |
| O | 0.35280500  | -0.18293200 | 1.70268400  |
| P | -0.57592500 | -2.04833200 | -0.28489300 |
| P | -1.04808200 | 1.86061400  | 0.07736400  |
| C | 0.93277600  | -2.25952500 | 0.75021000  |
| H | 1.59774800  | -4.16553700 | -0.00435000 |
| C | 2.92383600  | -3.40893700 | 1.51543300  |
| C | 1.79681800  | -3.35862900 | 0.69269800  |
| H | 3.59198700  | -4.26377700 | 1.46294400  |

|    |             |             |             |
|----|-------------|-------------|-------------|
| C  | 3.19876900  | -2.36828000 | 2.40491700  |
| H  | 4.08257200  | -2.43195800 | 3.03107400  |
| C  | 2.35211900  | -1.25722200 | 2.49973600  |
| C  | 1.23499400  | -1.24144100 | 1.66111700  |
| C  | 2.50779700  | 0.32244800  | -1.45246900 |
| Cl | -3.02199900 | -0.47665500 | -2.36010600 |
| C  | 3.92706100  | 0.47612600  | -1.40789400 |
| C  | 4.73736400  | -0.44179700 | -0.70574700 |
| C  | 4.55826600  | 1.55317300  | -2.06572600 |
| C  | 6.12083100  | -0.28204700 | -0.66352800 |
| H  | 4.26598600  | -1.27908600 | -0.20100000 |
| C  | 5.94174600  | 1.70729100  | -2.01814000 |
| H  | 3.94664500  | 2.26297000  | -2.61505500 |
| C  | 6.73120500  | 0.79208800  | -1.31689200 |
| H  | 6.72728000  | -1.00242900 | -0.11959200 |
| H  | 6.40665500  | 2.54455500  | -2.53282700 |
| H  | 7.81072000  | 0.91297700  | -1.28260600 |
| C  | 1.28969700  | 0.17955300  | -1.47654200 |

## S5

Zero-point correction= 0.087653 (Hartree/Particle)

Thermal correction to Energy= 0.092021

Thermal correction to Enthalpy= 0.092966

Thermal correction to Gibbs Free Energy= 0.059609

Sum of electronic and zero-point Energies= -231.468665



Sum of electronic and thermal Energies= -231.464296  
Sum of electronic and thermal Enthalpies= -231.463352  
Sum of electronic and thermal Free Energies= -231.496708

Cartesian coordinates

| ATOM | X           | Y           | Z          |
|------|-------------|-------------|------------|
| C    | 0.00017000  | -1.40023300 | 0.00000000 |
| C    | 1.22677300  | -0.77197600 | 0.00000000 |
| C    | -1.22669700 | -0.77201100 | 0.00000000 |
| C    | 1.21445800  | 0.63289000  | 0.00000000 |
| H    | 2.16330900  | -1.32340500 | 0.00000000 |
| C    | -1.21465100 | 0.63256600  | 0.00000000 |
| H    | -2.16292000 | -1.32398500 | 0.00000000 |
| C    | -0.00005100 | 1.32494700  | 0.00000000 |
| H    | 2.15485100  | 1.17949100  | 0.00000000 |
| H    | -2.15496300 | 1.17930700  | 0.00000000 |
| H    | -0.00029200 | 2.41150100  | 0.00000000 |

**S6**

Zero-point correction= 0.029838 (Hartree/Particle)  
Thermal correction to Energy= 0.032943  
Thermal correction to Enthalpy= 0.033887  
Thermal correction to Gibbs Free Energy= 0.011049  
Sum of electronic and zero-point Energies= -39.807680  
Sum of electronic and thermal Energies= -39.804574  
Sum of electronic and thermal Enthalpies= -39.803630

Sum of electronic and thermal Free Energies= -39.826469

Cartesian coordinates

| ATOM | X           | Y           | Z           |
|------|-------------|-------------|-------------|
| C    | 0.00000000  | 0.00000000  | -0.00015200 |
| H    | 0.00000000  | 1.08286100  | 0.00030300  |
| H    | -0.93778600 | -0.54143100 | 0.00030300  |
| H    | 0.93778600  | -0.54143100 | 0.00030300  |

## 6. Coordinates of radical structures in figure S1

### S1

Cartesian coordinates

| ATOM | X           | Y           | Z           |
|------|-------------|-------------|-------------|
| C    | 1.72245300  | -5.17396500 | 0.53738600  |
| C    | 2.87493000  | -4.91662200 | -0.21420300 |
| C    | 3.10002900  | -3.64761000 | -0.75435600 |
| C    | 2.11621300  | -2.68096900 | -0.52108300 |
| C    | 1.03829200  | -2.84956300 | 0.34921200  |
| C    | 0.82701400  | -4.14737300 | 0.84418100  |
| C    | 3.50287400  | -0.89861300 | -0.97856900 |
| C    | 4.61602600  | -1.73131500 | -1.13792600 |
| C    | 5.86839700  | -1.14007700 | -0.95665500 |
| H    | 6.77408900  | -1.72974000 | -1.05824500 |
| C    | 5.96908900  | 0.22073200  | -0.64621900 |
| C    | 4.82950100  | 1.01631900  | -0.51483800 |
| C    | 3.54942600  | 0.46106900  | -0.67231200 |
| H    | 1.54800500  | -6.17341000 | 0.92640400  |
| H    | 3.59530900  | -5.71360700 | -0.37024100 |
| H    | -0.01724900 | -4.34502700 | 1.49694300  |
| H    | 6.95036400  | 0.66677400  | -0.50934100 |
| H    | 4.93815200  | 2.06803200  | -0.27332900 |
| O    | 2.25054100  | -1.45001100 | -1.11373700 |
| C    | 4.34224500  | -3.19448600 | -1.54187000 |
| C    | 4.02297800  | -3.23623000 | -3.06331400 |

|   |             |             |             |
|---|-------------|-------------|-------------|
| H | 3.79461100  | -4.26255800 | -3.37358300 |
| H | 3.16387600  | -2.60502300 | -3.30653900 |
| H | 4.88346800  | -2.88128200 | -3.64173900 |
| C | 5.55157700  | -4.10061500 | -1.26169600 |
| H | 5.81498000  | -4.11026400 | -0.19853300 |
| H | 5.34637400  | -5.12905200 | -1.57570800 |
| H | 6.42450400  | -3.76506600 | -1.83062100 |
| P | 0.20775700  | -1.31132800 | 1.00703200  |
| P | 1.93928600  | 1.42423800  | -0.71140400 |
| C | -1.36945200 | -2.05873600 | 1.63404100  |
| C | -1.75493100 | -2.00340900 | 2.98001500  |
| C | -2.23368800 | -2.66895700 | 0.70847800  |
| C | -2.97327800 | -2.55099800 | 3.39307000  |
| H | -1.10527500 | -1.53657900 | 3.71295800  |
| C | -3.44459800 | -3.22077500 | 1.12284700  |
| H | -1.95939900 | -2.70678100 | -0.34197100 |
| C | -3.81906900 | -3.16283400 | 2.46847500  |
| H | -3.25576800 | -2.49950900 | 4.44143700  |
| H | -4.09977400 | -3.68949900 | 0.39333900  |
| H | -4.76486000 | -3.59020600 | 2.79113600  |
| C | 1.17910200  | -1.04616400 | 2.57674400  |
| C | 1.19671200  | 0.25374100  | 3.10726300  |
| C | 1.84874400  | -2.06384000 | 3.27471000  |
| C | 1.85161900  | 0.52729300  | 4.31036100  |
| H | 0.70243400  | 1.04981900  | 2.55633300  |

|   |            |             |             |
|---|------------|-------------|-------------|
| C | 2.51148700 | -1.78808300 | 4.47200400  |
| H | 1.86056800 | -3.07609900 | 2.88562300  |
| C | 2.51209500 | -0.49346600 | 4.99564800  |
| H | 1.85226900 | 1.54091700  | 4.70267500  |
| H | 3.02924000 | -2.58799000 | 4.99527500  |
| H | 3.02861000 | -0.28192800 | 5.92839700  |
| C | 2.41602300 | 2.95492600  | 0.20885300  |
| C | 2.06596100 | 4.23118700  | -0.25828700 |
| C | 3.04728900 | 2.84320800  | 1.45956500  |
| C | 2.35951700 | 5.36589100  | 0.50031500  |
| H | 1.54391800 | 4.33480400  | -1.20175900 |
| C | 3.33877900 | 3.97994100  | 2.21513200  |
| H | 3.31649500 | 1.86555800  | 1.84808800  |
| C | 2.99720100 | 5.24636900  | 1.73610000  |
| H | 2.08038600 | 6.34614600  | 0.12299500  |
| H | 3.83442400 | 3.87328500  | 3.17696400  |
| H | 3.22397700 | 6.13269100  | 2.32319000  |
| C | 2.01735200 | 1.87336000  | -2.51086700 |
| C | 3.03637800 | 2.68611900  | -3.03030000 |
| C | 1.08444000 | 1.30812200  | -3.39065700 |
| C | 3.11163400 | 2.93941400  | -4.40024500 |
| H | 3.77277300 | 3.13111300  | -2.36768400 |
| C | 1.16999100 | 1.55075500  | -4.76268700 |
| H | 0.28273200 | 0.69690800  | -2.98858800 |
| C | 2.17974100 | 2.36924300  | -5.27045000 |

|    |              |             |             |
|----|--------------|-------------|-------------|
| H  | 3.89987600   | 3.58058200  | -4.78681200 |
| H  | 0.43637500   | 1.10913200  | -5.43208100 |
| H  | 2.24020000   | 2.56502600  | -6.33807900 |
| Rh | -0.17465600  | 0.66040800  | -0.15460900 |
| Cl | -0.90536600  | 2.80036800  | -1.07450000 |
| C  | -3.38632700  | 0.69198400  | 0.26724000  |
| O  | -2.29753100  | 0.23819900  | -0.12452000 |
| C  | -4.56191300  | 0.27119700  | -0.45187800 |
| C  | -5.51144300  | -0.09781400 | -1.11766100 |
| C  | -6.60838500  | -0.53647400 | -1.91171700 |
| C  | -7.93150500  | -0.20052600 | -1.56022400 |
| C  | -6.37918700  | -1.31300400 | -3.06618600 |
| C  | -8.99608200  | -0.63363100 | -2.34541900 |
| H  | -8.10855100  | 0.39995100  | -0.67335200 |
| C  | -7.45036300  | -1.73998200 | -3.84569000 |
| H  | -5.35946400  | -1.56669900 | -3.33805200 |
| C  | -8.75906000  | -1.40306300 | -3.48806700 |
| H  | -10.01261300 | -0.36948500 | -2.06778500 |
| H  | -7.26507500  | -2.33559300 | -4.73511700 |
| H  | -9.59241700  | -1.73804900 | -4.09948400 |
| C  | -3.56200400  | 1.59862600  | 1.42543500  |
| C  | -4.85202200  | 1.89717500  | 1.89935900  |
| C  | -2.44502800  | 2.15248300  | 2.07332600  |
| C  | -5.02230000  | 2.72515600  | 3.00509300  |
| H  | -5.71616300  | 1.47268700  | 1.39854800  |

|   |             |            |            |
|---|-------------|------------|------------|
| C | -2.62079400 | 2.98229400 | 3.17685100 |
| H | -1.45256400 | 1.94724100 | 1.68300600 |
| C | -3.90599400 | 3.26951000 | 3.64580600 |
| H | -6.02261500 | 2.94828100 | 3.36558300 |
| H | -1.75335900 | 3.41753300 | 3.66509300 |
| H | -4.03797400 | 3.92164100 | 4.50540900 |

## S2

Cartesian coordinates

| ATOM | X           | Y           | Z           |
|------|-------------|-------------|-------------|
| C    | -2.32565600 | 2.28167900  | -0.40676100 |
| C    | -2.90389800 | 3.46593200  | -0.88907600 |
| H    | -2.27623100 | 4.33430600  | -1.05462400 |
| C    | -4.26227900 | 3.54181100  | -1.18462200 |
| H    | -4.68240000 | 4.46704900  | -1.56890200 |
| C    | -5.08200600 | 2.43168300  | -0.98882000 |
| H    | -6.13893700 | 2.50631600  | -1.22082400 |
| C    | -4.55818000 | 1.23590900  | -0.49143300 |
| C    | -3.18208600 | 1.17885800  | -0.22127600 |
| C    | -5.40084000 | 0.00008700  | -0.15636300 |
| C    | -4.55824500 | -1.23577500 | -0.49143600 |
| C    | -3.18214000 | -1.17879200 | -0.22131000 |
| C    | -2.32575700 | -2.28163800 | -0.40686100 |
| C    | -2.90407800 | -3.46586200 | -0.88916200 |
| H    | -2.27647100 | -4.33426700 | -1.05475600 |

|   |             |             |             |
|---|-------------|-------------|-------------|
| C | -4.26247700 | -3.54168100 | -1.18464500 |
| H | -4.68265300 | -4.46690100 | -1.56890800 |
| C | -5.08214500 | -2.43151700 | -0.98881200 |
| H | -6.13908900 | -2.50609300 | -1.22078200 |
| C | -5.68507600 | 0.00009700  | 1.37425200  |
| H | -4.75454300 | 0.00008100  | 1.94985400  |
| H | -6.26086000 | -0.88989000 | 1.65415200  |
| H | -6.26082800 | 0.89010900  | 1.65414200  |
| C | -6.74681300 | 0.00010700  | -0.90049000 |
| H | -7.34185000 | 0.87659200  | -0.62623700 |
| H | -7.34187000 | -0.87636800 | -0.62624500 |
| H | -6.61041400 | 0.00011100  | -1.98710100 |
| C | 0.15611100  | 3.64765900  | -1.01413000 |
| C | 0.30302500  | 4.93007600  | -0.46093500 |
| H | 0.01077400  | 5.11472600  | 0.56810000  |
| C | 0.82949800  | 5.97610400  | -1.22289200 |
| H | 0.94090900  | 6.96214300  | -0.77848900 |
| C | 1.20859900  | 5.75718700  | -2.54818900 |
| H | 1.61845800  | 6.57166000  | -3.14016600 |
| C | 1.05968800  | 4.48626700  | -3.10894400 |
| H | 1.35105900  | 4.30839100  | -4.14100000 |
| C | 0.54311900  | 3.43635700  | -2.34878500 |
| H | 0.42544600  | 2.44846600  | -2.78570900 |
| C | -0.36604500 | 2.74651900  | 1.68440600  |
| C | 0.90929100  | 3.02273100  | 2.20806300  |



|   |             |             |             |
|---|-------------|-------------|-------------|
| H | 1.78101300  | 2.96097200  | 1.56224800  |
| C | 1.07056200  | 3.39116100  | 3.54281200  |
| H | 2.06480900  | 3.60672700  | 3.92537700  |
| C | -0.04084500 | 3.47589600  | 4.38625000  |
| H | 0.08357100  | 3.75927200  | 5.42819800  |
| C | -1.31053300 | 3.19699600  | 3.88044900  |
| H | -2.18200900 | 3.26372300  | 4.52691200  |
| C | -1.47304000 | 2.83811100  | 2.53970000  |
| H | -2.46873300 | 2.63477200  | 2.15920000  |
| C | 0.15594000  | -3.64765700 | -1.01448600 |
| C | 0.30274400  | -4.93013100 | -0.46137300 |
| H | 0.01049500  | -5.11482000 | 0.56765600  |
| C | 0.82911300  | -5.97615900 | -1.22339300 |
| H | 0.94041800  | -6.96224000 | -0.77905800 |
| C | 1.20823800  | -5.75719200 | -2.54868000 |
| H | 1.61801900  | -6.57166600 | -3.14070800 |
| C | 1.05945400  | -4.48622200 | -3.10934600 |
| H | 1.35085700  | -4.30829900 | -4.14138400 |
| C | 0.54297800  | -3.43631100 | -2.34911900 |
| H | 0.42539200  | -2.44838600 | -2.78598700 |
| C | -0.36598400 | -2.74661900 | 1.68414100  |
| C | 0.90935500  | -3.02318600 | 2.20761000  |
| H | 1.78099700  | -2.96168900 | 1.56166000  |
| C | 1.07071500  | -3.39162100 | 3.54234600  |
| H | 2.06495400  | -3.60747500 | 3.92477300  |

|    |             |             |             |
|----|-------------|-------------|-------------|
| C  | -0.04059200 | -3.47601000 | 4.38595000  |
| H  | 0.08389700  | -3.75940000 | 5.42788600  |
| C  | -1.31027500 | -3.19674700 | 3.88033600  |
| H  | -2.18167000 | -3.26319600 | 4.52693500  |
| C  | -1.47287600 | -2.83785700 | 2.53960100  |
| H  | -2.46856200 | -2.63422900 | 2.15923600  |
| O  | -2.65268200 | 0.00001300  | 0.26608300  |
| P  | -0.49862300 | 2.18595700  | -0.07402000 |
| P  | -0.49869300 | -2.18599500 | -0.07425900 |
| Cl | -0.66506700 | 0.00010200  | -2.64403400 |
| Rh | 0.24574000  | 0.00000800  | -0.39878200 |
| C  | 2.68326200  | -0.00011700 | 1.31713500  |
| O  | 1.42855600  | -0.00015500 | 1.36116800  |
| C  | 3.34418900  | 0.00001600  | 0.05397600  |
| C  | 3.80321600  | 0.00012000  | -1.07591200 |
| C  | 4.22669600  | 0.00019700  | -2.43174700 |
| C  | 5.59533200  | 0.00018200  | -2.76934300 |
| C  | 3.25095500  | 0.00030100  | -3.45304800 |
| C  | 5.98096000  | 0.00027100  | -4.10606300 |
| H  | 6.33963800  | 0.00010000  | -1.97878500 |
| C  | 3.65274800  | 0.00039100  | -4.78589500 |
| H  | 2.19653900  | 0.00030900  | -3.18713500 |
| C  | 5.01182800  | 0.00037800  | -5.11453100 |
| H  | 7.03624300  | 0.00025900  | -4.36404300 |
| H  | 2.90108400  | 0.00047400  | -5.57003500 |

|   |            |             |             |
|---|------------|-------------|-------------|
| H | 5.31754700 | 0.00044800  | -6.15741900 |
| C | 3.46927900 | -0.00023400 | 2.56840600  |
| C | 4.87399800 | -0.00014400 | 2.53882800  |
| C | 2.80036300 | -0.00044100 | 3.80578800  |
| C | 5.59992800 | -0.00025200 | 3.72750600  |
| H | 5.38725600 | 0.00001500  | 1.58198400  |
| C | 3.53154200 | -0.00055000 | 4.98962000  |
| H | 1.71654800 | -0.00051600 | 3.81641800  |
| C | 4.93032800 | -0.00045500 | 4.95407900  |
| H | 6.68585800 | -0.00017800 | 3.69813700  |
| H | 3.01184700 | -0.00071000 | 5.94363800  |
| H | 5.49693800 | -0.00053900 | 5.88145800  |

### S3

Cartesian coordinates

| ATOM | X           | Y          | Z           |
|------|-------------|------------|-------------|
| C    | -1.65893700 | 4.32602500 | -2.76679500 |
| C    | -2.81362400 | 3.60352900 | -3.08199800 |
| C    | -2.97657300 | 2.29072500 | -2.63182700 |
| C    | -1.93265700 | 1.74574000 | -1.87539200 |
| C    | -0.81590200 | 2.46787600 | -1.44787100 |
| C    | -0.67903600 | 3.77592900 | -1.93987800 |
| C    | -3.25973300 | 0.08078600 | -0.96045300 |
| C    | -4.40983500 | 0.56977500 | -1.59151600 |
| C    | -5.63582100 | 0.20824200 | -1.02875100 |

|   |             |             |             |
|---|-------------|-------------|-------------|
| H | -6.56382100 | 0.56164200  | -1.46665700 |
| C | -5.68502800 | -0.61995200 | 0.09822800  |
| C | -4.51468400 | -1.10982900 | 0.67711800  |
| C | -3.26034600 | -0.75579700 | 0.15598500  |
| H | -1.53997700 | 5.33938200  | -3.13972000 |
| H | -3.58787400 | 4.07553500  | -3.67820100 |
| H | 0.17800600  | 4.37401300  | -1.65138800 |
| H | -6.64789300 | -0.89334500 | 0.52066300  |
| H | -4.57599900 | -1.75750100 | 1.54540700  |
| O | -2.02692500 | 0.44152700  | -1.45435900 |
| C | -4.20725800 | 1.40147600  | -2.87098000 |
| C | -3.90583900 | 0.42963100  | -4.04765600 |
| H | -3.72736700 | 0.99588700  | -4.96897800 |
| H | -3.02035900 | -0.17905600 | -3.84404100 |
| H | -4.75516600 | -0.24345300 | -4.21092600 |
| C | -5.45288200 | 2.23186600  | -3.21857000 |
| H | -5.70832400 | 2.93728800  | -2.42042200 |
| H | -5.29595800 | 2.79757500  | -4.14237100 |
| H | -6.31450800 | 1.57963100  | -3.39212500 |
| P | 0.22831200  | 1.77141800  | -0.07520800 |
| P | -1.62736700 | -1.46927600 | 0.71129800  |
| C | 1.71325100  | 2.87396300  | -0.20733700 |
| C | 2.10171300  | 3.73917100  | 0.82431300  |
| C | 2.47326200  | 2.83992200  | -1.38986400 |
| C | 3.22429500  | 4.55896200  | 0.67718800  |

|   |             |             |             |
|---|-------------|-------------|-------------|
| H | 1.53155600  | 3.78306700  | 1.74580400  |
| C | 3.58966400  | 3.66390900  | -1.53390000 |
| H | 2.19308000  | 2.16817500  | -2.19645900 |
| C | 3.96898300  | 4.52642500  | -0.50114600 |
| H | 3.51060900  | 5.22435900  | 1.48736300  |
| H | 4.16375000  | 3.62998900  | -2.45629300 |
| H | 4.83901900  | 5.16771900  | -0.61630400 |
| C | -0.64066400 | 2.42564200  | 1.42847700  |
| C | -0.25159700 | 1.90338600  | 2.67453400  |
| C | -1.63957700 | 3.41011900  | 1.39079300  |
| C | -0.83547700 | 2.36711600  | 3.85421000  |
| H | 0.51027400  | 1.12893900  | 2.71483600  |
| C | -2.23280100 | 3.86184000  | 2.57197800  |
| H | -1.95723300 | 3.82923100  | 0.44215700  |
| C | -1.83023900 | 3.34621600  | 3.80527800  |
| H | -0.52004300 | 1.95275100  | 4.80765600  |
| H | -3.00902000 | 4.62130000  | 2.52566300  |
| H | -2.29125100 | 3.70312400  | 4.72257300  |
| C | -1.93636900 | -1.81303300 | 2.49624500  |
| C | -1.43352500 | -2.97070600 | 3.11301600  |
| C | -2.58256700 | -0.84911800 | 3.28879700  |
| C | -1.60124300 | -3.16749500 | 4.48474800  |
| H | -0.89579800 | -3.70461100 | 2.52466400  |
| C | -2.74582400 | -1.05054300 | 4.66015000  |
| H | -2.96340300 | 0.06213800  | 2.83819500  |

|    |             |             |             |
|----|-------------|-------------|-------------|
| C  | -2.25953100 | -2.21264700 | 5.26178200  |
| H  | -1.20979700 | -4.07064100 | 4.94532800  |
| H  | -3.25365800 | -0.29627900 | 5.25562600  |
| H  | -2.38896600 | -2.37081200 | 6.32933700  |
| C  | -1.77559500 | -3.08998900 | -0.17049100 |
| C  | -2.65120300 | -4.09966300 | 0.25404500  |
| C  | -1.06456500 | -3.26308900 | -1.36639200 |
| C  | -2.80033400 | -5.26666800 | -0.49654300 |
| H  | -3.21223000 | -3.98615800 | 1.17659800  |
| C  | -1.22636100 | -4.42444000 | -2.12252500 |
| H  | -0.37185300 | -2.49416400 | -1.69427900 |
| C  | -2.09035500 | -5.43071300 | -1.68751100 |
| H  | -3.47299500 | -6.04683400 | -0.14938800 |
| H  | -0.66438900 | -4.54634100 | -3.04453400 |
| H  | -2.20824800 | -6.33981200 | -2.27147800 |
| Rh | 0.67324700  | -0.49787700 | 0.29123100  |
| Cl | 1.32700000  | -2.74540900 | 1.05103700  |
| C  | 2.70115000  | -0.61669800 | -2.21958900 |
| O  | 2.10114800  | 0.03489700  | -3.07495100 |
| C  | 2.47958800  | -0.38368400 | -0.79369400 |
| C  | 2.78843600  | -0.16020200 | 0.41048900  |
| C  | 3.64665400  | 0.17029700  | 1.52047100  |
| C  | 3.38907900  | -0.32756800 | 2.81189500  |
| C  | 4.76504300  | 1.00218200  | 1.31406900  |
| C  | 4.23839600  | -0.00207900 | 3.86753200  |

|   |            |             |             |
|---|------------|-------------|-------------|
| H | 2.54200700 | -0.99024900 | 2.95542300  |
| C | 5.60379200 | 1.32504500  | 2.37817200  |
| H | 4.95550200 | 1.40015900  | 0.32248000  |
| C | 5.34455900 | 0.82555700  | 3.65723600  |
| H | 4.03717000 | -0.40037400 | 4.85855900  |
| H | 6.46175000 | 1.97024800  | 2.20792600  |
| H | 6.00217600 | 1.07891000  | 4.48469200  |
| C | 3.70044800 | -1.66217200 | -2.59649600 |
| C | 4.17994600 | -2.60350500 | -1.67270300 |
| C | 4.15000600 | -1.69864200 | -3.92699300 |
| C | 5.10677500 | -3.56396400 | -2.07942400 |
| H | 3.80192500 | -2.60029100 | -0.65516300 |
| C | 5.08175700 | -2.65214600 | -4.32414500 |
| H | 3.75622700 | -0.96900700 | -4.62722400 |
| C | 5.56246500 | -3.58619000 | -3.39917800 |
| H | 5.46803700 | -4.29833100 | -1.36488100 |
| H | 5.43424200 | -2.67242300 | -5.35206000 |
| H | 6.28804300 | -4.33341700 | -3.71071200 |

## 7. Coordinates of radical structures in figure S2

### INT1-A'

Cartesian coordinates

| ATOM | X          | Y           | Z           |
|------|------------|-------------|-------------|
| C    | 1.05625000 | -3.00267400 | -0.34825300 |
| C    | 1.22160700 | -4.36328800 | -0.64116300 |
| H    | 0.37796700 | -4.92941800 | -1.02047100 |
| C    | 2.45236300 | -4.99247400 | -0.48202500 |
| H    | 2.56318400 | -6.04364600 | -0.73163200 |
| C    | 3.53983800 | -4.27157700 | 0.00556400  |
| H    | 4.48804700 | -4.77904600 | 0.14281000  |
| C    | 3.42353700 | -2.91516600 | 0.32481900  |
| C    | 2.18578700 | -2.29296100 | 0.10766700  |
| C    | 4.54296300 | -2.10070600 | 0.97963200  |
| C    | 4.44973500 | -0.66320700 | 0.45989500  |
| C    | 3.17935200 | -0.11617200 | 0.22782200  |
| C    | 2.99518700 | 1.23582600  | -0.12780700 |
| C    | 4.14386200 | 2.02450500  | -0.28473400 |
| H    | 4.03670100 | 3.06101900  | -0.58488400 |
| C    | 5.41686700 | 1.49578000  | -0.09693400 |
| H    | 6.29301500 | 2.12134400  | -0.24036800 |
| C    | 5.56333900 | 0.16208800  | 0.27601200  |
| H    | 6.56030000 | -0.23505300 | 0.42967600  |
| C    | 4.29124700 | -2.07907900 | 2.51631500  |
| H    | 3.31502300 | -1.64458900 | 2.75330700  |



|   |             |             |             |
|---|-------------|-------------|-------------|
| H | 5.06088900  | -1.48222800 | 3.01926100  |
| H | 4.31903200  | -3.09752000 | 2.92080600  |
| C | 5.92998000  | -2.71782700 | 0.72686900  |
| H | 5.98308400  | -3.73157500 | 1.13423900  |
| H | 6.70905900  | -2.14269300 | 1.23550300  |
| H | 6.16886300  | -2.75908400 | -0.34092300 |
| C | -1.42727900 | -3.07294200 | -1.96498900 |
| C | -2.05690500 | -4.32003800 | -1.80325400 |
| H | -2.07209200 | -4.80173600 | -0.83030200 |
| C | -2.68682600 | -4.94057100 | -2.88251400 |
| H | -3.16893200 | -5.90470000 | -2.74277000 |
| C | -2.70424400 | -4.32008000 | -4.13349400 |
| H | -3.19892200 | -4.80169200 | -4.97306900 |
| C | -2.09132200 | -3.07720300 | -4.29911300 |
| H | -2.10531800 | -2.58604400 | -5.26826600 |
| C | -1.45731000 | -2.45203400 | -3.22352200 |
| H | -0.96604100 | -1.49450100 | -3.35773600 |
| C | -1.56956000 | -2.83018600 | 0.88936200  |
| C | -2.95486600 | -2.58985100 | 0.91603200  |
| H | -3.43512700 | -2.10155600 | 0.07258100  |
| C | -3.72495500 | -2.98739700 | 2.00772500  |
| H | -4.79556100 | -2.79991200 | 2.00845100  |
| C | -3.12430000 | -3.62692900 | 3.09538100  |
| H | -3.72428900 | -3.93540500 | 3.94722100  |
| C | -1.75079100 | -3.86749300 | 3.08013600  |

|   |             |             |             |
|---|-------------|-------------|-------------|
| H | -1.27529700 | -4.36780600 | 3.91975000  |
| C | -0.97749600 | -3.47186700 | 1.98564200  |
| H | 0.08895800  | -3.67288600 | 1.98606000  |
| C | 1.54471900  | 3.24498300  | -1.74450600 |
| C | 2.05203800  | 4.52555500  | -1.46085300 |
| H | 2.31230200  | 4.79709900  | -0.44220200 |
| C | 2.20381400  | 5.46732600  | -2.47882500 |
| H | 2.59749300  | 6.45333200  | -2.24574800 |
| C | 1.83996800  | 5.14580900  | -3.78817900 |
| H | 1.95292400  | 5.88137500  | -4.58059500 |
| C | 1.32104500  | 3.88211800  | -4.07275700 |
| H | 1.02497400  | 3.62926600  | -5.08719700 |
| C | 1.16882100  | 2.93423700  | -3.05942200 |
| H | 0.77120100  | 1.95150700  | -3.28265700 |
| C | 1.02456300  | 3.04253800  | 1.06811400  |
| C | -0.10637300 | 3.87871100  | 1.05592200  |
| H | -0.74222500 | 3.91566900  | 0.17545900  |
| C | -0.41265100 | 4.66605300  | 2.16430900  |
| H | -1.28719900 | 5.31086100  | 2.13997300  |
| C | 0.39845400  | 4.62650100  | 3.30187100  |
| H | 0.15670700  | 5.23974300  | 4.16592800  |
| C | 1.51799000  | 3.79528200  | 3.32369600  |
| H | 2.15425200  | 3.75909800  | 4.20419100  |
| C | 1.83026500  | 3.00599700  | 2.21366300  |
| H | 2.70730100  | 2.36711000  | 2.24189300  |

|    |             |             |             |
|----|-------------|-------------|-------------|
| O  | 2.05984800  | -0.93228900 | 0.37705700  |
| P  | -0.60728200 | -2.20256700 | -0.55612100 |
| P  | 1.31856900  | 1.98661700  | -0.41321200 |
| Cl | 1.30493200  | -0.47212000 | -2.67904000 |
| Rh | -0.02100100 | 0.09748700  | -0.61474800 |
| C  | -2.71057700 | 1.86874200  | -0.99329200 |
| O  | -2.25613500 | 2.61948300  | -1.85650300 |
| C  | -1.83383000 | 1.00880000  | -0.20586300 |
| C  | -1.34383300 | 0.62999000  | 0.92165200  |
| C  | -1.41332500 | 0.59092900  | 2.36368000  |
| C  | -2.50089600 | 1.16778000  | 3.05415200  |
| C  | -0.38602200 | -0.01112700 | 3.11391600  |
| C  | -2.55406300 | 1.13648600  | 4.44432500  |
| H  | -3.29591300 | 1.64334200  | 2.48844600  |
| C  | -0.44585100 | -0.04306800 | 4.50533200  |
| H  | 0.45332600  | -0.45015900 | 2.58414000  |
| C  | -1.52856000 | 0.52966600  | 5.17632900  |
| H  | -3.39737100 | 1.58864900  | 4.96014800  |
| H  | 0.35596800  | -0.51375900 | 5.06855300  |
| H  | -1.57336900 | 0.50659500  | 6.26205100  |
| C  | -4.18625200 | 1.83882500  | -0.71193000 |
| C  | -4.77446500 | 0.89591100  | 0.14343300  |
| C  | -4.99913600 | 2.78812500  | -1.35089100 |
| C  | -6.15272600 | 0.90846800  | 0.36286200  |
| H  | -4.15161500 | 0.15248700  | 0.63044600  |

|   |             |            |             |
|---|-------------|------------|-------------|
| C | -6.37348500 | 2.80045500 | -1.12980400 |
| H | -4.52693800 | 3.50217700 | -2.01760900 |
| C | -6.95362300 | 1.86047400 | -0.27141700 |
| H | -6.60160900 | 0.17359400 | 1.02599600  |
| H | -6.99592500 | 3.54011800 | -1.62645700 |
| H | -8.02705700 | 1.86917400 | -0.10061900 |

### TS1-A'

Cartesian coordinates

| ATOM | X           | Y           | Z           |
|------|-------------|-------------|-------------|
| Rh   | 0.08748300  | 0.00295700  | -0.27767300 |
| C    | 1.81268500  | -0.91037200 | -0.09043500 |
| C    | 0.96746900  | -1.15743200 | 1.46649800  |
| O    | 1.13938500  | -0.43391200 | 2.43398300  |
| C    | 2.97483700  | -1.28711300 | -0.29697600 |
| C    | -2.18186100 | 5.19582400  | -0.13824800 |
| H    | -2.95338600 | 5.95688700  | -0.16687900 |
| C    | -2.53419300 | 3.85986600  | 0.07282600  |
| C    | -1.51146500 | 2.89942100  | 0.07747000  |
| C    | -3.96245400 | 3.39561700  | 0.35952400  |
| C    | -4.14115000 | 2.04126600  | -0.32835600 |
| C    | -3.07091500 | 1.13682300  | -0.29519800 |
| C    | -3.18883400 | -0.18409400 | -0.75717400 |
| C    | -4.40498400 | -0.55734700 | -1.34306100 |
| H    | -4.52007100 | -1.55845500 | -1.74050300 |

|   |             |            |             |
|---|-------------|------------|-------------|
| C | -5.46100000 | 0.34192500 | -1.45103000 |
| H | -6.38819100 | 0.03666000 | -1.92720300 |
| C | -5.33203400 | 1.62727700 | -0.93157000 |
| H | -6.17133000 | 2.31050000 | -0.99500400 |
| C | -4.11509200 | 3.19350600 | 1.89589300  |
| H | -3.38189600 | 2.47777100 | 2.27998000  |
| H | -5.11726100 | 2.81724700 | 2.13127300  |
| H | -3.96800900 | 4.14529000 | 2.41939600  |
| C | -5.01243500 | 4.42252100 | -0.09679900 |
| H | -4.88315000 | 5.37053900 | 0.43378000  |
| H | -6.02137500 | 4.07174800 | 0.13932300  |
| H | -4.95497700 | 4.61549500 | -1.17320100 |
| C | 2.51994900  | 2.55548900 | -1.12584200 |
| C | 3.44212800  | 3.55601400 | -0.77070800 |
| H | 3.39838500  | 4.01502100 | 0.21181300  |
| C | 4.43611600  | 3.95239000 | -1.66653100 |
| H | 5.14108200  | 4.72800700 | -1.37894100 |
| C | 4.52783600  | 3.34753800 | -2.92177400 |
| H | 5.30465100  | 3.65313200 | -3.61803500 |
| C | 3.62248600  | 2.34584800 | -3.27611500 |
| H | 3.69053100  | 1.86778700 | -4.24949900 |
| C | 2.62290300  | 1.94761100 | -2.38640900 |
| H | 1.90759100  | 1.18437600 | -2.67022600 |
| C | 1.96117600  | 2.33956600 | 1.68972800  |
| C | 3.20735600  | 1.76518300 | 1.99185100  |

|   |             |             |             |
|---|-------------|-------------|-------------|
| H | 3.71133000  | 1.14617000  | 1.25700900  |
| C | 3.79632700  | 1.96913500  | 3.23710400  |
| H | 4.76009200  | 1.51710800  | 3.45542400  |
| C | 3.14696900  | 2.74067100  | 4.20417400  |
| H | 3.60669900  | 2.89735900  | 5.17646400  |
| C | 1.90464900  | 3.30519300  | 3.91711500  |
| H | 1.39116900  | 3.90544500  | 4.66368200  |
| C | 1.31341800  | 3.10621400  | 2.66742600  |
| H | 0.34829800  | 3.55553200  | 2.45874500  |
| C | -1.96437700 | -2.62145700 | -1.91550100 |
| C | -2.99654100 | -3.56581200 | -2.06135300 |
| H | -3.77905100 | -3.64410000 | -1.31335800 |
| C | -3.01861400 | -4.42698000 | -3.15929700 |
| H | -3.82228300 | -5.15200800 | -3.25756200 |
| C | -2.01189000 | -4.35803300 | -4.12472600 |
| H | -2.03058300 | -5.02982500 | -4.97892000 |
| C | -0.98358700 | -3.42465800 | -3.98839700 |
| H | -0.19955500 | -3.36146700 | -4.73788800 |
| C | -0.95585400 | -2.56215700 | -2.89121900 |
| H | -0.17030700 | -1.81962000 | -2.79882700 |
| C | -2.49874400 | -2.30936600 | 0.98135500  |
| C | -2.55071100 | -3.70430800 | 1.11136500  |
| H | -2.20531000 | -4.34101800 | 0.30613400  |
| C | -3.03120900 | -4.29244000 | 2.28363000  |
| H | -3.06401900 | -5.37577200 | 2.36152600  |

|    |             |             |             |
|----|-------------|-------------|-------------|
| C  | -3.45614200 | -3.49915400 | 3.34838100  |
| H  | -3.83060000 | -3.95889600 | 4.25910500  |
| C  | -3.38484100 | -2.10857000 | 3.24018400  |
| H  | -3.69970200 | -1.47842000 | 4.06773500  |
| C  | -2.90949500 | -1.52007700 | 2.06996000  |
| H  | -2.85553800 | -0.43763900 | 2.00852000  |
| O  | -1.84967500 | 1.55400000  | 0.24546900  |
| P  | 1.20138300  | 2.01004100  | 0.04292700  |
| P  | -1.83349400 | -1.43699100 | -0.51319600 |
| Cl | -0.62285200 | 0.92336400  | -2.57457200 |
| C  | -0.15865400 | 3.25454200  | -0.06134300 |
| H  | 1.18433100  | 4.90277600  | -0.38932100 |
| C  | -0.85158200 | 5.57246300  | -0.30947300 |
| C  | 0.14901200  | 4.60835600  | -0.25691900 |
| H  | -0.59674800 | 6.61451300  | -0.47853300 |
| C  | 4.29580500  | -1.77187800 | -0.48516600 |
| C  | 5.36117200  | -0.88317900 | -0.75604400 |
| C  | 4.57544600  | -3.15510700 | -0.40522700 |
| C  | 6.65409000  | -1.36504800 | -0.93913700 |
| H  | 5.15407300  | 0.17959700  | -0.83731500 |
| C  | 5.87364900  | -3.62467900 | -0.58047500 |
| H  | 3.76386900  | -3.84429000 | -0.19347300 |
| C  | 6.91802900  | -2.73492300 | -0.84959100 |
| H  | 7.46084900  | -0.66861000 | -1.15262100 |
| H  | 6.07255600  | -4.69094000 | -0.50952000 |

|   |            |             |             |
|---|------------|-------------|-------------|
| H | 7.92945000 | -3.10656300 | -0.99017200 |
| C | 0.79786500 | -2.65094400 | 1.66333300  |
| C | 0.80446100 | -3.58951300 | 0.62124800  |
| C | 0.69798100 | -3.10724100 | 2.98535400  |
| C | 0.73230500 | -4.95446000 | 0.89813700  |
| H | 0.88707000 | -3.25058400 | -0.40558600 |
| C | 0.61777000 | -4.47205700 | 3.26144400  |
| H | 0.70429100 | -2.37446100 | 3.78494400  |
| C | 0.64213900 | -5.40135900 | 2.21988000  |
| H | 0.74975100 | -5.67010500 | 0.07982900  |
| H | 0.54610800 | -4.80992300 | 4.29218500  |
| H | 0.59268000 | -6.46597700 | 2.43443100  |

## INT2-A'

Cartesian coordinates

| ATOM | X           | Y           | Z           |
|------|-------------|-------------|-------------|
| Rh   | 0.02165800  | -0.00255000 | -0.15864100 |
| C    | 1.92863100  | -0.29284500 | -0.41828600 |
| C    | -0.07991700 | -0.04466800 | 1.88809500  |
| O    | -1.17583300 | 0.32369100  | 2.27959900  |
| C    | 3.10776000  | -0.43525400 | -0.71786300 |
| C    | -4.24023500 | 3.36107600  | -1.27181100 |
| H    | -5.26327500 | 3.62414500  | -1.51492900 |
| C    | -3.93965600 | 2.05644100  | -0.86702500 |
| C    | -2.60031000 | 1.74902300  | -0.59315600 |



|   |             |             |             |
|---|-------------|-------------|-------------|
| C | -5.00295900 | 0.98654300  | -0.61683300 |
| C | -4.40863800 | -0.36714400 | -1.00772100 |
| C | -3.05787900 | -0.61117900 | -0.72814800 |
| C | -2.48229100 | -1.88647100 | -0.87408600 |
| C | -3.27940400 | -2.90992500 | -1.40238200 |
| H | -2.84794100 | -3.89391600 | -1.55221800 |
| C | -4.60337900 | -2.67447400 | -1.75799600 |
| H | -5.20390900 | -3.47186400 | -2.18550800 |
| C | -5.16172200 | -1.41579500 | -1.54578700 |
| H | -6.20354400 | -1.25379900 | -1.79747900 |
| C | -5.30070500 | 0.95653100  | 0.91250500  |
| H | -4.39407700 | 0.75481500  | 1.49146600  |
| H | -6.03571800 | 0.17544700  | 1.13935800  |
| H | -5.70653400 | 1.92170800  | 1.23714400  |
| C | -6.31517700 | 1.28233400  | -1.36313800 |
| H | -6.73710900 | 2.23804200  | -1.03918100 |
| H | -7.06835000 | 0.52265000  | -1.13513200 |
| H | -6.17088100 | 1.31506500  | -2.44821300 |
| C | 1.25885500  | 3.31229400  | -1.24593400 |
| C | 1.56794600  | 4.65104500  | -0.94566100 |
| H | 1.16584200  | 5.11945300  | -0.05259300 |
| C | 2.40996200  | 5.38441200  | -1.78185100 |
| H | 2.63948700  | 6.41897700  | -1.54066300 |
| C | 2.96245000  | 4.78607500  | -2.91631300 |
| H | 3.62329300  | 5.35600900  | -3.56443800 |

|   |             |             |             |
|---|-------------|-------------|-------------|
| C | 2.66951000  | 3.45348500  | -3.21073300 |
| H | 3.10101400  | 2.97991100  | -4.08818000 |
| C | 1.82225600  | 2.71358000  | -2.38330000 |
| H | 1.58424800  | 1.68348300  | -2.62106200 |
| C | 0.40638500  | 3.13800500  | 1.49148500  |
| C | 1.66511900  | 2.96912400  | 2.09453100  |
| H | 2.43245400  | 2.38427300  | 1.59406900  |
| C | 1.93088900  | 3.53644700  | 3.33928100  |
| H | 2.90697300  | 3.39700000  | 3.79545700  |
| C | 0.94263300  | 4.26930400  | 4.00220700  |
| H | 1.15006900  | 4.70816100  | 4.97454700  |
| C | -0.31280600 | 4.42881000  | 3.41553900  |
| H | -1.08822700 | 4.99127000  | 3.92888300  |
| C | -0.58261400 | 3.86572700  | 2.16536600  |
| H | -1.56332600 | 3.99517500  | 1.72021300  |
| C | -0.02468400 | -3.44869500 | -1.50635100 |
| C | -0.31437500 | -4.82061600 | -1.39324800 |
| H | -0.95796700 | -5.18022500 | -0.59628900 |
| C | 0.24099000  | -5.73426000 | -2.28893900 |
| H | 0.00785000  | -6.79144300 | -2.19321700 |
| C | 1.09955600  | -5.29033500 | -3.29731100 |
| H | 1.53619900  | -6.00321200 | -3.99208600 |
| C | 1.39996800  | -3.93195600 | -3.40589800 |
| H | 2.07145600  | -3.58107000 | -4.18449100 |
| C | 0.84349400  | -3.00928000 | -2.51761000 |

|    |             |             |             |
|----|-------------|-------------|-------------|
| H  | 1.06473000  | -1.95327500 | -2.61498400 |
| C  | -0.95160900 | -3.19748900 | 1.21674200  |
| C  | 0.16343500  | -3.87305800 | 1.74294200  |
| H  | 1.10796200  | -3.86385500 | 1.20676500  |
| C  | 0.06813700  | -4.56394300 | 2.94937600  |
| H  | 0.93876800  | -5.08238500 | 3.34131100  |
| C  | -1.13757900 | -4.58266600 | 3.65480900  |
| H  | -1.21005300 | -5.11973400 | 4.59668100  |
| C  | -2.24562300 | -3.90458800 | 3.14705400  |
| H  | -3.18637100 | -3.91037700 | 3.69099600  |
| C  | -2.15513800 | -3.21472100 | 1.93613600  |
| H  | -3.02582400 | -2.69296700 | 1.55378200  |
| O  | -2.25891800 | 0.43497700  | -0.25799700 |
| P  | 0.15048600  | 2.33894600  | -0.14743400 |
| P  | -0.74734000 | -2.22748700 | -0.33807100 |
| Cl | -0.41852300 | 0.15972500  | -2.74113300 |
| C  | -1.58855100 | 2.72744400  | -0.62535300 |
| H  | -1.16855800 | 4.78400100  | -1.09060500 |
| C  | -3.25183000 | 4.33816200  | -1.36479800 |
| C  | -1.93993700 | 4.02353500  | -1.02602200 |
| H  | -3.50633500 | 5.34225800  | -1.69069300 |
| C  | 4.48246400  | -0.61156100 | -1.06207100 |
| C  | 5.31481800  | 0.49903500  | -1.31806700 |
| C  | 5.04701600  | -1.90155300 | -1.15678900 |
| C  | 6.65628000  | 0.32270100  | -1.64944500 |

|   |             |             |             |
|---|-------------|-------------|-------------|
| H | 4.88959700  | 1.49663500  | -1.25977400 |
| C | 6.38947400  | -2.07042700 | -1.48822400 |
| H | 4.41422600  | -2.76490000 | -0.97220600 |
| C | 7.20242700  | -0.96087900 | -1.73473900 |
| H | 7.27944000  | 1.19243600  | -1.84338400 |
| H | 6.80344500  | -3.07366200 | -1.55602600 |
| H | 8.24954000  | -1.09517400 | -1.99309400 |
| C | 0.95194300  | -0.44370400 | 2.91167400  |
| C | 2.15781200  | -1.08514600 | 2.60676000  |
| C | 0.65000500  | -0.16263900 | 4.25805300  |
| C | 3.04497500  | -1.43901700 | 3.62578000  |
| H | 2.40748900  | -1.28975700 | 1.57361300  |
| C | 1.53755800  | -0.50976000 | 5.27106000  |
| H | -0.28850300 | 0.33255400  | 4.48216800  |
| C | 2.73997100  | -1.15242300 | 4.95682700  |
| H | 3.97889100  | -1.93512300 | 3.37458200  |
| H | 1.29520300  | -0.28157500 | 6.30601200  |
| H | 3.43518400  | -1.42497500 | 5.74724300  |

### TS1-B'

Cartesian coordinates

| ATOM | X           | Y           | Z           |
|------|-------------|-------------|-------------|
| Rh   | 0.33043300  | -0.32426900 | 0.47538300  |
| C    | -0.49473900 | -2.23614200 | 0.93262200  |
| C    | -0.73407900 | -1.75368000 | -0.77404200 |

|   |             |             |             |
|---|-------------|-------------|-------------|
| O | -0.00452300 | -2.22595700 | -1.65099400 |
| C | -3.29947000 | -1.89533300 | -1.45250200 |
| C | 0.40207500  | 5.30821400  | -0.58518000 |
| H | 0.77463800  | 6.25590000  | -0.95730900 |
| C | 0.98734400  | 4.11435400  | -1.01246000 |
| C | 0.49680200  | 2.90817300  | -0.48796500 |
| C | 2.09618000  | 4.03772300  | -2.06218400 |
| C | 3.05268800  | 2.93325500  | -1.61157600 |
| C | 2.49641800  | 1.76610200  | -1.06417800 |
| C | 3.28039700  | 0.64728800  | -0.73712400 |
| C | 4.66655300  | 0.75441500  | -0.91921100 |
| H | 5.30310300  | -0.08095900 | -0.65507000 |
| C | 5.24713700  | 1.91958300  | -1.40703000 |
| H | 6.32533800  | 1.98382100  | -1.52097000 |
| C | 4.43971700  | 2.99790900  | -1.76118000 |
| H | 4.89861400  | 3.89449500  | -2.16258300 |
| C | 1.46379600  | 3.62283600  | -3.42328200 |
| H | 0.94383700  | 2.66329700  | -3.34715800 |
| H | 2.24200300  | 3.52996200  | -4.18962000 |
| H | 0.74123900  | 4.37930900  | -3.75096300 |
| C | 2.80991500  | 5.38555000  | -2.25605600 |
| H | 2.10478900  | 6.14928700  | -2.59795000 |
| H | 3.58020300  | 5.30622700  | -3.02902700 |
| H | 3.28036400  | 5.73633300  | -1.33146500 |
| C | -1.95577200 | 1.52628400  | 2.67481200  |

|   |             |             |             |
|---|-------------|-------------|-------------|
| C | -3.04325400 | 2.35338800  | 3.01160700  |
| H | -3.60888700 | 2.85884600  | 2.23588700  |
| C | -3.43506400 | 2.51045700  | 4.34140200  |
| H | -4.27563000 | 3.15656300  | 4.58078300  |
| C | -2.75520400 | 1.83448100  | 5.35641700  |
| H | -3.06150300 | 1.95549600  | 6.39228800  |
| C | -1.68651700 | 0.99849200  | 5.03240800  |
| H | -1.15283400 | 0.46531400  | 5.81446400  |
| C | -1.28880700 | 0.84281000  | 3.70320900  |
| H | -0.44315000 | 0.21191500  | 3.45991700  |
| C | -2.98136100 | 1.36732700  | -0.02297100 |
| C | -4.18037500 | 0.84656300  | 0.49035800  |
| H | -4.20006200 | 0.39601700  | 1.47762300  |
| C | -5.36470100 | 0.92379300  | -0.24330800 |
| H | -6.28282500 | 0.52177900  | 0.17581200  |
| C | -5.36953600 | 1.50405500  | -1.51225700 |
| H | -6.29186000 | 1.56087300  | -2.08352000 |
| C | -4.17904400 | 1.99951300  | -2.04540600 |
| H | -4.16847300 | 2.44805300  | -3.03535100 |
| C | -2.99669600 | 1.93201300  | -1.30834800 |
| H | -2.08450300 | 2.33558400  | -1.73570600 |
| C | 3.71088000  | -1.66785700 | 1.08033600  |
| C | 4.96385100  | -2.20414900 | 0.73015000  |
| H | 5.27417900  | -2.23724500 | -0.30906500 |
| C | 5.81123500  | -2.73221600 | 1.70473000  |

|    |             |             |             |
|----|-------------|-------------|-------------|
| H  | 6.77648900  | -3.13869400 | 1.41419500  |
| C  | 5.41561300  | -2.74575000 | 3.04357300  |
| H  | 6.07479600  | -3.15879900 | 3.80281300  |
| C  | 4.16755100  | -2.23379600 | 3.39923000  |
| H  | 3.84847200  | -2.24413000 | 4.43791000  |
| C  | 3.31910900  | -1.70045900 | 2.42734000  |
| H  | 2.36221800  | -1.28195500 | 2.71256000  |
| C  | 2.87451300  | -2.01958500 | -1.66515900 |
| C  | 3.11085200  | -3.39833800 | -1.54938800 |
| H  | 3.17503400  | -3.86127500 | -0.56983200 |
| C  | 3.28791100  | -4.19139900 | -2.68391900 |
| H  | 3.47283000  | -5.25632100 | -2.56973700 |
| C  | 3.22987000  | -3.62094800 | -3.95547800 |
| H  | 3.36800700  | -4.23787400 | -4.83938000 |
| C  | 2.99429000  | -2.25097800 | -4.08315500 |
| H  | 2.94709000  | -1.79479000 | -5.06851900 |
| C  | 2.81683300  | -1.45883700 | -2.94993400 |
| H  | 2.63062300  | -0.39687900 | -3.07160400 |
| O  | 1.11640700  | 1.71629700  | -0.86299500 |
| P  | -1.39089300 | 1.27088800  | 0.92852000  |
| P  | 2.54497000  | -0.96439500 | -0.17566200 |
| Cl | 1.63392900  | 1.16414600  | 2.13201300  |
| C  | -0.60652800 | 2.86599300  | 0.38102900  |
| H  | -2.00567000 | 4.09540500  | 1.45896900  |
| C  | -0.66277700 | 5.30024300  | 0.31258900  |

|   |             |             |             |
|---|-------------|-------------|-------------|
| C | -1.16960100 | 4.08942500  | 0.77065800  |
| H | -1.10432200 | 6.23531000  | 0.64473200  |
| C | -4.63345200 | -2.14777900 | -1.88575600 |
| C | -5.60209700 | -2.62444000 | -0.97951200 |
| C | -5.00067500 | -1.94776900 | -3.23135500 |
| C | -6.90004500 | -2.88892200 | -1.40944500 |
| H | -5.31981700 | -2.78770800 | 0.05602200  |
| C | -6.30259600 | -2.20861300 | -3.65153700 |
| H | -4.25505700 | -1.58721100 | -3.93288800 |
| C | -7.25632100 | -2.67898500 | -2.74452800 |
| H | -7.63596500 | -3.26118000 | -0.70158300 |
| H | -6.57354300 | -2.04927600 | -4.69189400 |
| H | -8.27004700 | -2.88524200 | -3.07723900 |
| C | -2.16068900 | -1.70056800 | -1.06941600 |
| C | 0.36248100  | -3.35449500 | 1.04363900  |
| C | -1.61134200 | -2.19005500 | 1.80031300  |
| C | 0.17297200  | -4.31973600 | 2.02696700  |
| H | 1.14483800  | -3.48256000 | 0.30583100  |
| C | -1.80296700 | -3.15502700 | 2.78625400  |
| H | -2.33659300 | -1.39163300 | 1.69452700  |
| C | -0.90198200 | -4.21566700 | 2.91542400  |
| H | 0.85438000  | -5.16416300 | 2.09159100  |
| H | -2.65779300 | -3.07995100 | 3.45362500  |
| H | -1.05481400 | -4.97274700 | 3.68008800  |



**INT2-B'**

Cartesian coordinates

| ATOM | X           | Y           | Z           |
|------|-------------|-------------|-------------|
| Rh   | -0.14184000 | 0.03273700  | 0.47555900  |
| C    | 1.43956800  | 0.20666800  | 1.73671400  |
| C    | 0.89670100  | 0.06058600  | -1.26068000 |
| O    | 0.23872500  | 0.00946600  | -2.29561200 |
| C    | 3.54905900  | 0.12739400  | -1.45469500 |
| C    | -4.65033500 | -2.75892800 | -1.39782700 |
| H    | -5.64383400 | -2.88471000 | -1.81286600 |
| C    | -4.04270200 | -1.50031200 | -1.42921800 |
| C    | -2.76780100 | -1.37298200 | -0.85771000 |
| C    | -4.64628000 | -0.29407000 | -2.14879600 |
| C    | -4.23004700 | 0.96768400  | -1.39198300 |
| C    | -2.94808800 | 1.02138200  | -0.82652300 |
| C    | -2.41538200 | 2.21188100  | -0.29753400 |
| C    | -3.24326600 | 3.34125200  | -0.26264300 |
| H    | -2.86624400 | 4.26189100  | 0.16828600  |
| C    | -4.54548300 | 3.29273800  | -0.74807900 |
| H    | -5.18091600 | 4.17177500  | -0.69516100 |
| C    | -5.02354300 | 2.11687700  | -1.32137600 |
| H    | -6.02836000 | 2.10087200  | -1.72761400 |
| C    | -4.01679900 | -0.22620600 | -3.57279100 |
| H    | -2.92591100 | -0.15183300 | -3.52176800 |
| H    | -4.39743600 | 0.64851300  | -4.11294900 |

|   |             |             |             |
|---|-------------|-------------|-------------|
| H | -4.27176100 | -1.12698900 | -4.14322300 |
| C | -6.17400300 | -0.40630200 | -2.29376700 |
| H | -6.44537400 | -1.29785500 | -2.86623100 |
| H | -6.57347200 | 0.44654400  | -2.85012700 |
| H | -6.67427300 | -0.45185400 | -1.32059300 |
| C | -0.32886300 | -3.55081800 | 1.71139800  |
| C | 0.48064700  | -4.69783900 | 1.69896300  |
| H | 1.12298800  | -4.90701500 | 0.85152700  |
| C | 0.46323800  | -5.58738300 | 2.77583200  |
| H | 1.09556900  | -6.47098900 | 2.74889500  |
| C | -0.36066600 | -5.34549800 | 3.87493000  |
| H | -0.37251400 | -6.03912000 | 4.71173000  |
| C | -1.16932800 | -4.20682900 | 3.89329500  |
| H | -1.81304700 | -4.00690100 | 4.74569600  |
| C | -1.15734900 | -3.31210600 | 2.82343800  |
| H | -1.77275600 | -2.41837100 | 2.85391300  |
| C | 0.71410300  | -3.16809000 | -0.96201700 |
| C | 2.10527900  | -3.10987100 | -0.77050800 |
| H | 2.51180800  | -2.57567600 | 0.08362100  |
| C | 2.97033100  | -3.72466700 | -1.67531700 |
| H | 4.04329800  | -3.66996800 | -1.51397200 |
| C | 2.45898400  | -4.38713500 | -2.79338400 |
| H | 3.13338000  | -4.85830700 | -3.50349100 |
| C | 1.07991400  | -4.43236700 | -3.00105000 |
| H | 0.67570900  | -4.93712900 | -3.87451300 |

|   |             |             |             |
|---|-------------|-------------|-------------|
| C | 0.20996800  | -3.82953500 | -2.09000600 |
| H | -0.85955900 | -3.87319300 | -2.26399800 |
| C | -0.63019500 | 3.50001200  | 1.69670700  |
| C | -0.70149500 | 4.89049400  | 1.49130800  |
| H | -0.74850400 | 5.29320300  | 0.48443200  |
| C | -0.68781700 | 5.76770900  | 2.57553900  |
| H | -0.74576400 | 6.83894700  | 2.40143400  |
| C | -0.59056700 | 5.26923200  | 3.87654900  |
| H | -0.57521900 | 5.95304500  | 4.72137300  |
| C | -0.50675700 | 3.89264600  | 4.08652900  |
| H | -0.42582600 | 3.49735500  | 5.09522000  |
| C | -0.52560900 | 3.00769800  | 3.00656900  |
| H | -0.48224700 | 1.93933800  | 3.17883300  |
| C | 0.16812000  | 3.27397800  | -1.07308700 |
| C | 1.36711300  | 3.96052300  | -0.81168600 |
| H | 1.75867300  | 4.00501200  | 0.19983300  |
| C | 2.05327900  | 4.60759600  | -1.83918600 |
| H | 2.97549300  | 5.13794500  | -1.61748600 |
| C | 1.55679800  | 4.57552700  | -3.14379700 |
| H | 2.09127900  | 5.08042800  | -3.94402000 |
| C | 0.37154200  | 3.89074500  | -3.41434300 |
| H | -0.02050000 | 3.85648200  | -4.42719100 |
| C | -0.31750400 | 3.24180600  | -2.38888000 |
| H | -1.23205100 | 2.70644200  | -2.61822200 |
| O | -2.15780700 | -0.12486800 | -0.80845500 |

|    |             |             |             |
|----|-------------|-------------|-------------|
| P  | -0.34636900 | -2.34817300 | 0.30374100  |
| P  | -0.65969900 | 2.32507000  | 0.27789600  |
| Cl | -1.94328700 | -0.00977100 | 2.35939800  |
| C  | -2.06825500 | -2.48101300 | -0.34534300 |
| H  | -2.19931200 | -4.58703500 | 0.06684000  |
| C  | -4.00234800 | -3.86537600 | -0.85224700 |
| C  | -2.71446400 | -3.72611200 | -0.34687800 |
| H  | -4.49579600 | -4.83256000 | -0.83353500 |
| C  | 4.97115600  | 0.13397900  | -1.54226000 |
| C  | 5.75662800  | 0.10024500  | -0.37126700 |
| C  | 5.61134700  | 0.16744500  | -2.79797100 |
| C  | 7.14636500  | 0.09954400  | -0.46166800 |
| H  | 5.26146200  | 0.08096400  | 0.59471600  |
| C  | 7.00144600  | 0.16781300  | -2.87721000 |
| H  | 5.00471900  | 0.19325700  | -3.69791400 |
| C  | 7.77193400  | 0.13318400  | -1.71127800 |
| H  | 7.74416500  | 0.07332100  | 0.44543000  |
| H  | 7.48600500  | 0.19448600  | -3.84950000 |
| H  | 8.85673700  | 0.13280500  | -1.77667700 |
| C  | 2.33648500  | 0.11156500  | -1.34820600 |
| C  | 2.44384400  | 1.17410700  | 1.58180900  |
| C  | 1.49030700  | -0.60857600 | 2.87894300  |
| C  | 3.46467700  | 1.31999000  | 2.52864400  |
| H  | 2.45122700  | 1.82020500  | 0.71125200  |
| C  | 2.51576100  | -0.47027800 | 3.82100900  |

|   |            |             |            |
|---|------------|-------------|------------|
| H | 0.71232600 | -1.33990800 | 3.06190800 |
| C | 3.51033500 | 0.49386400  | 3.65260100 |
| H | 4.22162300 | 2.08845000  | 2.38274300 |
| H | 2.52453100 | -1.11841700 | 4.69483900 |
| H | 4.30214100 | 0.60605300  | 4.38921200 |

## 8. Coordinates of radical structures in figure S3

### INT1-C

Cartesian coordinates

| ATOM | X           | Y           | Z           |
|------|-------------|-------------|-------------|
| P    | 2.33284000  | 1.02438000  | -0.46869800 |
| P    | 0.07854900  | -1.32734500 | -1.26122000 |
| Rh   | 0.24305400  | 0.24883200  | 0.37910600  |
| Cl   | 0.61861200  | 1.63032500  | 2.37985500  |
| C    | -2.38267900 | 1.56506000  | -0.87430500 |
| O    | -1.81454100 | 1.75342200  | -1.95386200 |
| C    | -1.79122900 | 0.73150500  | 0.15857500  |
| C    | -1.74592500 | -0.04018200 | 1.16571200  |
| C    | -2.31552000 | -0.80439900 | 2.24593600  |
| C    | -1.55733300 | -1.12179300 | 3.38913100  |
| C    | -3.65095900 | -1.25140200 | 2.16156000  |
| C    | -2.12811200 | -1.85962900 | 4.42344000  |
| H    | -0.54123700 | -0.74782000 | 3.45737700  |
| C    | -4.20698900 | -2.00155400 | 3.19499400  |
| H    | -4.23554500 | -1.01221700 | 1.27864800  |
| C    | -3.44925800 | -2.30639400 | 4.32925200  |
| H    | -1.53884100 | -2.08729300 | 5.30771000  |
| H    | -5.23512500 | -2.34540100 | 3.11668900  |
| H    | -3.88745500 | -2.88739900 | 5.13651100  |
| C    | -3.72270700 | 2.17597700  | -0.59692800 |
| C    | -4.29801600 | 2.18695500  | 0.68251800  |

|   |             |             |             |
|---|-------------|-------------|-------------|
| C | -4.40798500 | 2.77454600  | -1.66632500 |
| C | -5.54470100 | 2.77919000  | 0.88450300  |
| H | -3.76465800 | 1.74790200  | 1.51892700  |
| C | -5.65426600 | 3.35991200  | -1.46299500 |
| H | -3.94091000 | 2.76868900  | -2.64561900 |
| C | -6.22576600 | 3.36238100  | -0.18631100 |
| H | -5.98094200 | 2.78996000  | 1.87952800  |
| H | -6.18123100 | 3.81732400  | -2.29623600 |
| H | -7.19753000 | 3.82247500  | -0.02666400 |
| C | 2.23360200  | -0.49077500 | -2.95153900 |
| H | 2.82359500  | -1.29029600 | -2.48737100 |
| H | 2.55441700  | -0.44946800 | -4.00099400 |
| C | 0.73970400  | -0.86136000 | -2.93879900 |
| H | 0.55760800  | -1.69494200 | -3.62693200 |
| H | 0.14364800  | -0.00865500 | -3.28308600 |
| C | 2.55809300  | 0.86970800  | -2.31409700 |
| H | 3.57794400  | 1.18193600  | -2.56875800 |
| H | 1.89276600  | 1.63526100  | -2.73145800 |
| C | 2.58423600  | 2.84191800  | -0.29614300 |
| C | 3.85023900  | 3.40306300  | -0.08143200 |
| C | 1.47643500  | 3.68708000  | -0.46176900 |
| C | 4.00590900  | 4.79009300  | -0.03392400 |
| H | 4.71528300  | 2.76159900  | 0.05750400  |
| C | 1.63812200  | 5.07155900  | -0.42366400 |
| H | 0.48944600  | 3.25834200  | -0.60772200 |

|   |            |             |             |
|---|------------|-------------|-------------|
| C | 2.90178000 | 5.62579400  | -0.20647700 |
| H | 4.99086300 | 5.21509300  | 0.14145200  |
| H | 0.77272700 | 5.71666800  | -0.54888900 |
| H | 3.02397500 | 6.70507600  | -0.16619600 |
| C | 3.83774900 | 0.26598300  | 0.28162300  |
| C | 4.89652800 | -0.26574100 | -0.46988300 |
| C | 3.90175700 | 0.20050400  | 1.68619400  |
| C | 5.99568700 | -0.85029400 | 0.16505800  |
| H | 4.87836700 | -0.23091600 | -1.55443800 |
| C | 5.00495600 | -0.37607100 | 2.31496600  |
| H | 3.08432000 | 0.60726900  | 2.27694100  |
| C | 6.05330000 | -0.90577400 | 1.55757800  |
| H | 6.80582700 | -1.26004900 | -0.43258500 |
| H | 5.04344400 | -0.41202400 | 3.40054200  |
| H | 6.90977400 | -1.35852200 | 2.05033100  |
| C | 1.05311600 | -2.84562900 | -0.85269000 |
| C | 1.11420600 | -3.93858000 | -1.73445900 |
| C | 1.76061300 | -2.91172300 | 0.35589200  |
| C | 1.87132400 | -5.06511000 | -1.41598800 |
| H | 0.55668900 | -3.91837600 | -2.66707800 |
| C | 2.51821700 | -4.04158700 | 0.67561500  |
| H | 1.71779900 | -2.07391600 | 1.04658500  |
| C | 2.57632400 | -5.11770900 | -0.20974400 |
| H | 1.90870700 | -5.90343500 | -2.10669300 |
| H | 3.06349000 | -4.07418500 | 1.61467200  |



|   |             |             |             |
|---|-------------|-------------|-------------|
| H | 3.16594300  | -5.99658100 | 0.03743500  |
| C | -1.58932300 | -2.01376600 | -1.66150800 |
| C | -2.38865000 | -1.44932200 | -2.66792400 |
| C | -2.09887300 | -3.08976500 | -0.91704400 |
| C | -3.65854200 | -1.96454200 | -2.93537200 |
| H | -2.03831200 | -0.59129900 | -3.23121800 |
| C | -3.36942500 | -3.60057400 | -1.18487100 |
| H | -1.50021700 | -3.53635300 | -0.12921700 |
| C | -4.15128800 | -3.04238000 | -2.19806200 |
| H | -4.26329800 | -1.51767500 | -3.71999000 |
| H | -3.74607500 | -4.43568600 | -0.60036800 |
| H | -5.13971200 | -3.44201000 | -2.40873500 |

## INT2-C

Cartesian coordinates

| ATOM | X           | Y           | Z           |
|------|-------------|-------------|-------------|
| P    | -2.58213100 | -0.15930500 | 0.27269900  |
| P    | 0.54795100  | -1.26690200 | 1.34568500  |
| Rh   | -0.22782000 | 0.22531700  | -0.27201900 |
| Cl   | -1.05025000 | 1.14006800  | -2.37487400 |
| C    | -0.18738900 | 1.77875400  | 0.99599000  |
| O    | -0.61204900 | 1.61387000  | 2.12781000  |
| C    | 1.66949200  | 0.37670100  | -0.89765900 |
| C    | 2.81510500  | 0.41232700  | -1.33612600 |
| C    | 4.13370200  | 0.46437000  | -1.88118300 |

|   |             |             |             |
|---|-------------|-------------|-------------|
| C | 4.33267800  | 0.68042900  | -3.26162000 |
| C | 5.26874100  | 0.30407400  | -1.05850500 |
| C | 5.61812200  | 0.73282500  | -3.79529500 |
| H | 3.46407100  | 0.80709800  | -3.90100800 |
| C | 6.55142900  | 0.35931500  | -1.59933000 |
| H | 5.12599900  | 0.13839500  | 0.00507700  |
| C | 6.73356700  | 0.57308900  | -2.96834000 |
| H | 5.75084300  | 0.90088400  | -4.86122800 |
| H | 7.41436000  | 0.23589000  | -0.94930700 |
| H | 7.73571300  | 0.61602700  | -3.38700100 |
| C | 0.31255600  | 3.12468800  | 0.56425400  |
| C | 0.80927000  | 3.42599800  | -0.71147900 |
| C | 0.26298800  | 4.14157000  | 1.54138600  |
| C | 1.24781200  | 4.71906500  | -1.00012600 |
| H | 0.84508900  | 2.66026900  | -1.47310400 |
| C | 0.70349400  | 5.42623400  | 1.24714400  |
| H | -0.12422400 | 3.90074000  | 2.52526100  |
| C | 1.19827700  | 5.71833700  | -0.02843000 |
| H | 1.62882200  | 4.94109700  | -1.99278600 |
| H | 0.66200000  | 6.20038800  | 2.00888400  |
| H | 1.54286200  | 6.72282500  | -0.26112000 |
| C | -2.03925700 | -1.88348600 | 2.49820100  |
| H | -2.09713900 | -2.71015000 | 1.77912500  |
| H | -2.48073500 | -2.26549100 | 3.42798200  |
| C | -0.57297700 | -1.52279700 | 2.80546900  |

|   |             |             |             |
|---|-------------|-------------|-------------|
| H | -0.11611300 | -2.28579700 | 3.44559100  |
| H | -0.53382100 | -0.58082100 | 3.36032400  |
| C | -2.90510400 | -0.70164400 | 2.02605900  |
| H | -3.96592200 | -0.95751800 | 2.12013700  |
| H | -2.72126900 | 0.16297500  | 2.66944400  |
| C | 2.16114500  | -0.95205800 | 2.17902800  |
| C | 3.26233200  | -1.79880900 | 1.99046000  |
| C | 2.29261300  | 0.16017300  | 3.02789600  |
| C | 4.46975300  | -1.54348100 | 2.64444800  |
| H | 3.18403000  | -2.65601400 | 1.33073200  |
| C | 3.49981600  | 0.40940700  | 3.67994700  |
| H | 1.45966700  | 0.84060000  | 3.17093100  |
| C | 4.59155900  | -0.44111700 | 3.49107800  |
| H | 5.31446200  | -2.20908100 | 2.48814300  |
| H | 3.58779700  | 1.27403900  | 4.33218900  |
| H | 5.53177400  | -0.24333900 | 3.99879200  |
| C | 0.72239700  | -2.92874800 | 0.56754300  |
| C | 0.43181200  | -4.11565800 | 1.26144100  |
| C | 1.16339200  | -3.01503800 | -0.76493900 |
| C | 0.56859600  | -5.35569300 | 0.63629100  |
| H | 0.10180400  | -4.08614800 | 2.29463900  |
| C | 1.30568100  | -4.25845600 | -1.38374400 |
| H | 1.41568200  | -2.10820000 | -1.30750000 |
| C | 1.00379000  | -5.43017500 | -0.68819800 |
| H | 0.33594400  | -6.26311600 | 1.18708000  |

|   |             |             |             |
|---|-------------|-------------|-------------|
| H | 1.65340700  | -4.30625100 | -2.41198600 |
| H | 1.10951100  | -6.39682900 | -1.17325500 |
| C | -3.72685000 | 1.26943300  | 0.07526500  |
| C | -4.46258500 | 1.43054900  | -1.10904800 |
| C | -3.82344100 | 2.25340800  | 1.07321500  |
| C | -5.29446800 | 2.53729700  | -1.27926500 |
| H | -4.37994900 | 0.69627100  | -1.90237500 |
| C | -4.65810000 | 3.35799400  | 0.89870100  |
| H | -3.23550300 | 2.17676800  | 1.98190500  |
| C | -5.39860500 | 3.50148800  | -0.27567300 |
| H | -5.85619300 | 2.64721000  | -2.20292300 |
| H | -4.72400100 | 4.10872500  | 1.68177700  |
| H | -6.04671800 | 4.36330600  | -0.41068900 |
| C | -3.36207300 | -1.50791800 | -0.71332700 |
| C | -4.66576000 | -1.95521300 | -0.43611000 |
| C | -2.64501100 | -2.11618900 | -1.75337200 |
| C | -5.23042100 | -2.99602100 | -1.17144800 |
| H | -5.25215500 | -1.47945900 | 0.34519600  |
| C | -3.21216500 | -3.15941200 | -2.48982000 |
| H | -1.65385200 | -1.75461200 | -2.00643300 |
| C | -4.50158500 | -3.60343000 | -2.19807700 |
| H | -6.23991600 | -3.33005300 | -0.94672400 |
| H | -2.64443400 | -3.61768600 | -3.29478700 |
| H | -4.94261500 | -4.41432300 | -2.77176600 |

## INT3-C

Cartesian coordinates

| ATOM | X           | Y           | Z           |
|------|-------------|-------------|-------------|
| P    | -1.93049900 | -1.09718200 | 0.52637900  |
| P    | 1.40233100  | -0.65885300 | 1.35784800  |
| Rh   | 0.23277600  | -0.79921700 | -0.79878300 |
| Cl   | 0.62712000  | -3.28211200 | -0.65666100 |
| C    | -0.59152900 | -0.92820200 | -2.52152900 |
| O    | -1.06305800 | -0.96649200 | -3.56279100 |
| C    | -0.09980700 | 1.16027700  | -0.95810500 |
| C    | -0.30596800 | 2.34498100  | -1.17993600 |
| C    | -0.49829000 | 3.73980000  | -1.42632000 |
| C    | -1.16250100 | 4.56434500  | -0.49490800 |
| C    | -0.00958400 | 4.32893700  | -2.61169200 |
| C    | -1.32663600 | 5.92600300  | -0.74133300 |
| H    | -1.55212900 | 4.11817200  | 0.41420400  |
| C    | -0.17925800 | 5.69048200  | -2.85216100 |
| H    | 0.50330900  | 3.70201000  | -3.33515400 |
| C    | -0.83658500 | 6.49678200  | -1.91892700 |
| H    | -1.84311000 | 6.54529800  | -0.01166700 |
| H    | 0.20452500  | 6.12484300  | -3.77198000 |
| H    | -0.96801900 | 7.55874200  | -2.10884000 |
| C    | 2.03100800  | -0.55154200 | -1.90041000 |
| C    | 2.78708200  | 0.62630000  | -1.84138900 |
| C    | 2.47778800  | -1.58285600 | -2.73814600 |

|   |             |             |             |
|---|-------------|-------------|-------------|
| C | 3.97692100  | 0.75502000  | -2.56486000 |
| H | 2.45105500  | 1.46152200  | -1.23874600 |
| C | 3.66339000  | -1.44918600 | -3.47018700 |
| H | 1.92083400  | -2.51039800 | -2.80795600 |
| C | 4.42281000  | -0.28285300 | -3.38322300 |
| H | 4.55088800  | 1.67607300  | -2.48723800 |
| H | 3.98791300  | -2.26716300 | -4.11011600 |
| H | 5.34496800  | -0.18110800 | -3.95002200 |
| C | -0.53137400 | -2.57951100 | 2.52213300  |
| H | -0.66195000 | -3.37765200 | 1.78700600  |
| H | -0.67946500 | -3.03740500 | 3.50846300  |
| C | 0.93899700  | -2.09923800 | 2.45540400  |
| H | 1.55005600  | -2.91889100 | 2.07008500  |
| H | 1.32821700  | -1.86909800 | 3.45350400  |
| C | -1.63150200 | -1.51972200 | 2.32383700  |
| H | -2.57978200 | -1.88565000 | 2.73198000  |
| H | -1.38655400 | -0.60104800 | 2.86208300  |
| C | -3.02881000 | 0.38517700  | 0.60974600  |
| C | -2.89186700 | 1.36031700  | 1.60930000  |
| C | -3.98666400 | 0.58870400  | -0.39791400 |
| C | -3.71637100 | 2.48749900  | 1.62054200  |
| H | -2.13828700 | 1.26286500  | 2.38343200  |
| C | -4.80099900 | 1.72034600  | -0.39142400 |
| H | -4.10844800 | -0.14634400 | -1.18794400 |
| C | -4.67425600 | 2.67105800  | 0.62308500  |

|   |             |             |             |
|---|-------------|-------------|-------------|
| H | -3.60410600 | 3.22344700  | 2.41253800  |
| H | -5.53588400 | 1.85678200  | -1.18003100 |
| H | -5.31243900 | 3.55038100  | 0.63178100  |
| C | -3.11231200 | -2.42545200 | 0.01227400  |
| C | -4.35869500 | -2.53791400 | 0.65690900  |
| C | -2.79548200 | -3.33114800 | -1.00853400 |
| C | -5.26320400 | -3.53074000 | 0.28662500  |
| H | -4.63432300 | -1.83448700 | 1.43789500  |
| C | -3.70632400 | -4.32534600 | -1.37915700 |
| H | -1.82519200 | -3.28757700 | -1.48864500 |
| C | -4.93842400 | -4.42735800 | -0.73589400 |
| H | -6.22261800 | -3.60164500 | 0.79215900  |
| H | -3.44218200 | -5.02193200 | -2.16999900 |
| H | -5.64456500 | -5.20083500 | -1.02614600 |
| C | 1.11779600  | 0.85566900  | 2.37848200  |
| C | 1.34425700  | 2.11504000  | 1.79686100  |
| C | 0.71629100  | 0.80512900  | 3.72414800  |
| C | 1.16950900  | 3.28493700  | 2.53688200  |
| H | 1.64400500  | 2.18477600  | 0.75931100  |
| C | 0.53330700  | 1.97760200  | 4.46176600  |
| H | 0.54766900  | -0.14576700 | 4.21729700  |
| C | 0.75859900  | 3.22059600  | 3.86972000  |
| H | 1.34462300  | 4.24634400  | 2.06281500  |
| H | 0.22136800  | 1.91389400  | 5.50085200  |
| H | 0.61797500  | 4.13269200  | 4.44354300  |

|   |            |             |            |
|---|------------|-------------|------------|
| C | 3.23837000 | -0.83595400 | 1.34195400 |
| C | 4.08066600 | 0.01193300  | 2.07506800 |
| C | 3.79962200 | -1.89263200 | 0.60438300 |
| C | 5.46219200 | -0.19334300 | 2.07109800 |
| H | 3.66755100 | 0.83333600  | 2.65013900 |
| C | 5.17910300 | -2.09338000 | 0.60867900 |
| H | 3.15908000 | -2.54638800 | 0.02088300 |
| C | 6.01398400 | -1.24477300 | 1.33943600 |
| H | 6.10408400 | 0.47216500  | 2.64237600 |
| H | 5.60096500 | -2.91015600 | 0.02968400 |
| H | 7.08947100 | -1.40135900 | 1.33614400 |

#### INT4-C

Cartesian coordinates

| ATOM | X           | Y           | Z           |
|------|-------------|-------------|-------------|
| P    | 2.37906700  | -0.38249200 | 0.43937200  |
| P    | -0.89273700 | -1.68608800 | 0.96494200  |
| Rh   | 0.07257300  | 0.45985000  | -0.01048100 |
| Cl   | -0.07164000 | 1.26914900  | 2.31897700  |
| C    | 0.04935900  | -0.05863200 | -1.80620800 |
| O    | -0.01886100 | -0.33240700 | -2.91761900 |
| C    | -1.78332000 | 1.13568000  | -0.39651700 |
| C    | -2.89616800 | 1.55009400  | -0.68476000 |
| C    | -4.20348600 | 2.05167200  | -0.96652400 |
| C    | -4.94134900 | 2.73546300  | 0.02207700  |



|   |             |             |             |
|---|-------------|-------------|-------------|
| C | -4.78993700 | 1.87945500  | -2.23718300 |
| C | -6.21598100 | 3.22528700  | -0.25273300 |
| H | -4.49612300 | 2.87948700  | 1.00197900  |
| C | -6.06531000 | 2.37143900  | -2.50540400 |
| H | -4.22895800 | 1.35919900  | -3.00814000 |
| C | -6.78553400 | 3.04594500  | -1.51613700 |
| H | -6.76722600 | 3.75184300  | 0.52254400  |
| H | -6.49869800 | 2.22942900  | -3.49238900 |
| H | -7.77986800 | 3.42993100  | -1.72834700 |
| C | 0.79293000  | 2.32761600  | -0.68440000 |
| C | 0.27140900  | 3.49979600  | -0.12011900 |
| C | 1.77375000  | 2.44500800  | -1.67784400 |
| C | 0.75018200  | 4.75218800  | -0.51594700 |
| H | -0.50106400 | 3.43929400  | 0.63665000  |
| C | 2.24985800  | 3.70124700  | -2.07530100 |
| H | 2.19405800  | 1.56526200  | -2.15666700 |
| C | 1.74311100  | 4.86064300  | -1.49235000 |
| H | 0.33535600  | 5.64799900  | -0.05881900 |
| H | 3.01617500  | 3.76297300  | -2.84514900 |
| H | 2.10912600  | 5.83713500  | -1.79958400 |
| C | 1.48354800  | -1.91223400 | 2.67750500  |
| H | 1.50547100  | -0.90444000 | 3.10163400  |
| H | 1.90600500  | -2.57888000 | 3.44008500  |
| C | 0.01162800  | -2.32586900 | 2.47597800  |
| H | -0.57198000 | -1.94036500 | 3.31694100  |

|   |             |             |             |
|---|-------------|-------------|-------------|
| H | -0.10100800 | -3.41653500 | 2.49909800  |
| C | 2.38671100  | -1.96872000 | 1.42946000  |
| H | 3.42334300  | -2.16185300 | 1.72223400  |
| H | 2.09732500  | -2.78714000 | 0.76306400  |
| C | 3.29773000  | -0.88331100 | -1.08645100 |
| C | 2.85822800  | -1.99603500 | -1.82559900 |
| C | 4.38242900  | -0.13827400 | -1.57535600 |
| C | 3.50182100  | -2.36513100 | -3.00678300 |
| H | 2.00378300  | -2.57943200 | -1.49262600 |
| C | 5.02078700  | -0.50714800 | -2.76151000 |
| H | 4.73114200  | 0.73230500  | -1.03059700 |
| C | 4.58663300  | -1.62263900 | -3.47801400 |
| H | 3.14917200  | -3.23080200 | -3.56073300 |
| H | 5.85909800  | 0.08204700  | -3.12333100 |
| H | 5.08530500  | -1.90901000 | -4.39988200 |
| C | 3.57864300  | 0.66819300  | 1.36367500  |
| C | 4.84832800  | 0.15951300  | 1.69647200  |
| C | 3.24867500  | 1.97538600  | 1.74603200  |
| C | 5.76312100  | 0.93992300  | 2.40040400  |
| H | 5.13791200  | -0.84194900 | 1.38983600  |
| C | 4.16964600  | 2.75413000  | 2.45233100  |
| H | 2.27380500  | 2.37828300  | 1.50634600  |
| C | 5.42292300  | 2.24098700  | 2.78213600  |
| H | 6.74008200  | 0.53369000  | 2.64849000  |
| H | 3.89704600  | 3.76410000  | 2.74483600  |

|   |             |             |             |
|---|-------------|-------------|-------------|
| H | 6.13540100  | 2.84953100  | 3.33286300  |
| C | -0.89836100 | -3.06931200 | -0.26130500 |
| C | -1.68773500 | -2.89656900 | -1.41460300 |
| C | -0.14287400 | -4.24539800 | -0.14125900 |
| C | -1.71944900 | -3.87021300 | -2.41074000 |
| H | -2.28878200 | -1.99750600 | -1.52597200 |
| C | -0.16862100 | -5.21825600 | -1.14639300 |
| H | 0.46756300  | -4.42369000 | 0.73829700  |
| C | -0.95570700 | -5.03416400 | -2.28222700 |
| H | -2.33961600 | -3.71821100 | -3.28977000 |
| H | 0.42378900  | -6.12226300 | -1.03219700 |
| H | -0.97756200 | -5.79132800 | -3.06112900 |
| C | -2.63537500 | -1.69172800 | 1.57337400  |
| C | -3.41392300 | -2.86019200 | 1.53593100  |
| C | -3.17125800 | -0.52878800 | 2.14860600  |
| C | -4.70618100 | -2.86500200 | 2.06275400  |
| H | -3.01917700 | -3.76830500 | 1.09100500  |
| C | -4.46373200 | -0.54223200 | 2.67564000  |
| H | -2.57886300 | 0.37782600  | 2.18128200  |
| C | -5.23419700 | -1.70515800 | 2.63236500  |
| H | -5.29869500 | -3.77540000 | 2.02458900  |
| H | -4.87044500 | 0.36559500  | 3.11253700  |
| H | -6.24258500 | -1.70760400 | 3.03787400  |

**INT5-C**

Cartesian coordinates

| ATOM | X           | Y          | Z           |
|------|-------------|------------|-------------|
| C    | 0.63319800  | 2.29717700 | -0.24350300 |
| C    | -0.63320300 | 2.29714700 | -0.24347700 |
| C    | 1.92602900  | 2.94082400 | -0.24161900 |
| O    | 0.00003300  | 0.04132100 | -3.09870800 |
| Cl   | 0.00008400  | 0.41600100 | 2.36620700  |
| C    | -1.92606000 | 2.94074700 | -0.24153800 |
| C    | -2.27842700 | 3.83623100 | -1.27093200 |
| C    | -2.85012600 | 2.69468500 | 0.79267400  |
| C    | -3.52004400 | 4.47001400 | -1.26173500 |
| H    | -1.56982400 | 4.02943300 | -2.07138300 |
| C    | -4.08486300 | 3.33927800 | 0.79807600  |
| H    | -2.57584700 | 2.00611000 | 1.58523400  |
| C    | -4.42711900 | 4.22571600 | -0.22769700 |
| H    | -3.77753800 | 5.15916900 | -2.06208100 |
| H    | -4.78425300 | 3.14399300 | 1.60659600  |
| H    | -5.39370900 | 4.72265100 | -0.22126800 |
| C    | 0.00003300  | 0.08072000 | -1.94392200 |
| C    | 2.27833900  | 3.83627200 | -1.27106500 |
| C    | 2.85012100  | 2.69486000 | 0.79259200  |
| C    | 3.51992400  | 4.47011700 | -1.26191700 |
| H    | 1.56971500  | 4.02939900 | -2.07151600 |
| C    | 4.08482500  | 3.33951800 | 0.79794500  |
| H    | 2.57588700  | 2.00631400 | 1.58519300  |

|    |             |             |             |
|----|-------------|-------------|-------------|
| C  | 4.42702500  | 4.22592000  | -0.22787700 |
| H  | 3.77737300  | 5.15924400  | -2.06230300 |
| H  | 4.78423400  | 3.14431200  | 1.60646700  |
| H  | 5.39358800  | 4.72290600  | -0.22148500 |
| P  | 1.88907300  | -1.40837900 | 0.15463400  |
| P  | -1.88908000 | -1.40832100 | 0.15460000  |
| Rh | 0.00003100  | 0.19786900  | -0.09958800 |
| C  | -0.00004500 | -3.24501000 | 1.38736900  |
| H  | -0.00005500 | -2.50471600 | 2.19295400  |
| H  | -0.00007000 | -4.23129100 | 1.86945600  |
| C  | -1.30066300 | -3.14329800 | 0.56195300  |
| H  | -2.11017600 | -3.66069000 | 1.08888200  |
| H  | -1.15893600 | -3.66057400 | -0.39462600 |
| C  | 1.30062400  | -3.14333300 | 0.56202800  |
| H  | 2.11010500  | -3.66070600 | 1.08902600  |
| H  | 1.15895300  | -3.66064900 | -0.39453800 |
| C  | -3.16931800 | -1.10920400 | 1.45865000  |
| C  | -4.43061000 | -0.58575900 | 1.13250000  |
| C  | -2.88110700 | -1.37243400 | 2.80891600  |
| C  | -5.38196600 | -0.34793200 | 2.12615100  |
| H  | -4.68105600 | -0.36799400 | 0.10003200  |
| C  | -3.83588600 | -1.13767400 | 3.79861900  |
| H  | -1.90504900 | -1.74194300 | 3.09877200  |
| C  | -5.08990000 | -0.62553000 | 3.46205300  |
| H  | -6.35480700 | 0.05042200  | 1.84979100  |

|   |             |             |             |
|---|-------------|-------------|-------------|
| H | -3.59224400 | -1.34867300 | 4.83645500  |
| H | -5.83163400 | -0.44192000 | 4.23486200  |
| C | -2.93839000 | -1.67496300 | -1.34623600 |
| C | -3.21051700 | -0.57934700 | -2.18199800 |
| C | -3.50968000 | -2.91811900 | -1.66489000 |
| C | -4.02408700 | -0.72386000 | -3.30754900 |
| H | -2.79309800 | 0.39547100  | -1.94621400 |
| C | -4.31121400 | -3.06516800 | -2.79778900 |
| H | -3.34229600 | -3.77987800 | -1.02654200 |
| C | -4.57003600 | -1.96877900 | -3.62267900 |
| H | -4.22321600 | 0.13705700  | -3.93979800 |
| H | -4.73868700 | -4.03676800 | -3.03142300 |
| H | -5.19518500 | -2.08435900 | -4.50397900 |
| C | 3.16928400  | -1.10921200 | 1.45869200  |
| C | 4.43046100  | -0.58548100 | 1.13256200  |
| C | 2.88116600  | -1.37265700 | 2.80893400  |
| C | 5.38180200  | -0.34758400 | 2.12621000  |
| H | 4.68082900  | -0.36754700 | 0.10011100  |
| C | 3.83592900  | -1.13782600 | 3.79863600  |
| H | 1.90519500  | -1.74241000 | 3.09877800  |
| C | 5.08983100  | -0.62539400 | 3.46208900  |
| H | 6.35455700  | 0.05099100  | 1.84986700  |
| H | 3.59236300  | -1.34899500 | 4.83645500  |
| H | 5.83155300  | -0.44172900 | 4.23489700  |
| C | 2.93841900  | -1.67508100 | -1.34616800 |

|   |            |             |             |
|---|------------|-------------|-------------|
| C | 3.21053400 | -0.57951000 | -2.18199000 |
| C | 3.50974900 | -2.91824100 | -1.66473500 |
| C | 4.02413000 | -0.72406800 | -3.30751800 |
| H | 2.79308600 | 0.39531200  | -1.94627400 |
| C | 4.31130900 | -3.06533700 | -2.79760900 |
| H | 3.34237600 | -3.77996600 | -1.02633800 |
| C | 4.57011700 | -1.96899100 | -3.62256200 |
| H | 4.22324600 | 0.13681500  | -3.93981600 |
| H | 4.73881300 | -4.03694000 | -3.03117500 |
| H | 5.19528700 | -2.08460900 | -4.50384300 |

### CAT-2a-C

Cartesian coordinates

| ATOM | X           | Y          | Z           |
|------|-------------|------------|-------------|
| Cl   | -1.01379300 | 1.38181200 | 2.50381100  |
| C    | 1.78943300  | 0.06611900 | 1.59751200  |
| C    | 1.90259300  | 1.19921300 | 1.08093500  |
| C    | 2.50864700  | 2.47950200 | 0.82612700  |
| C    | 3.85153700  | 2.69632200 | 1.19828500  |
| C    | 1.79946700  | 3.52764000 | 0.21305200  |
| C    | 4.45868000  | 3.92702000 | 0.96499500  |
| H    | 4.40493900  | 1.89144300 | 1.67246500  |
| C    | 2.41449000  | 4.75652300 | -0.02023300 |
| H    | 0.76460600  | 3.35897100 | -0.06521200 |
| C    | 3.74468800  | 4.96205600 | 0.35313600  |

|    |             |             |             |
|----|-------------|-------------|-------------|
| H  | 5.49299800  | 4.07990800  | 1.26218800  |
| H  | 1.85099100  | 5.55858500  | -0.49002800 |
| H  | 4.22145300  | 5.92179200  | 0.17263200  |
| C  | 2.00985500  | -1.14464300 | 2.33911200  |
| C  | 1.02320100  | -1.65421800 | 3.20757100  |
| C  | 3.23559200  | -1.83020600 | 2.21461900  |
| C  | 1.26630600  | -2.81901000 | 3.93153200  |
| H  | 0.09075500  | -1.10825200 | 3.31008900  |
| C  | 3.46527100  | -2.99623200 | 2.94228700  |
| H  | 3.99403800  | -1.44199400 | 1.54178900  |
| C  | 2.48288500  | -3.49570700 | 3.80106300  |
| H  | 0.50295000  | -3.19873600 | 4.60570900  |
| H  | 4.41435500  | -3.51602000 | 2.83871100  |
| H  | 2.66538900  | -4.40507000 | 4.36763800  |
| P  | -2.25937700 | 0.37037300  | -0.47515600 |
| P  | 0.76879800  | -0.47491800 | -1.46846400 |
| Rh | -0.07044700 | 0.46438500  | 0.43435300  |
| C  | -1.23808300 | 0.91848700  | -3.03148800 |
| H  | -1.16908700 | 1.90275200  | -2.55247200 |
| H  | -1.55798100 | 1.10726900  | -4.06417600 |
| C  | 0.15718900  | 0.27026800  | -3.08326800 |
| H  | 0.89273400  | 1.02034100  | -3.38908700 |
| H  | 0.17441700  | -0.51433500 | -3.84804900 |
| C  | -2.30877300 | 0.06747800  | -2.31919400 |
| H  | -3.30807500 | 0.31626600  | -2.69117000 |



|   |             |             |             |
|---|-------------|-------------|-------------|
| H | -2.13797200 | -0.99636300 | -2.51725200 |
| C | 2.60118200  | -0.47109900 | -1.74190700 |
| C | 3.37912600  | -1.62284100 | -1.54978600 |
| C | 3.24963100  | 0.72527500  | -2.09013400 |
| C | 4.76468700  | -1.58360200 | -1.72498900 |
| H | 2.90625600  | -2.55645200 | -1.26476100 |
| C | 4.63239900  | 0.76283600  | -2.26806400 |
| H | 2.68178900  | 1.64409500  | -2.20472900 |
| C | 5.39491300  | -0.39342000 | -2.08983100 |
| H | 5.34894300  | -2.48829600 | -1.57771000 |
| H | 5.11286000  | 1.69957700  | -2.53672700 |
| H | 6.47232900  | -0.36464500 | -2.22885800 |
| C | 0.33595300  | -2.26978700 | -1.65442300 |
| C | 0.56655500  | -2.98135200 | -2.84522800 |
| C | -0.22360700 | -2.94919000 | -0.56249600 |
| C | 0.22944500  | -4.33068900 | -2.94464400 |
| H | 1.02934500  | -2.48872400 | -3.69619400 |
| C | -0.56132500 | -4.30184600 | -0.66197100 |
| H | -0.39175500 | -2.41066500 | 0.36583000  |
| C | -0.33980500 | -4.99303100 | -1.85281300 |
| H | 0.41405900  | -4.86623600 | -3.87228900 |
| H | -0.99812500 | -4.80979200 | 0.19324000  |
| H | -0.60397300 | -6.04431000 | -1.93197100 |
| C | -3.25707800 | 1.92246300  | -0.36946000 |
| C | -2.65379700 | 3.12811500  | 0.01085600  |

|   |             |             |             |
|---|-------------|-------------|-------------|
| C | -4.61754700 | 1.91960600  | -0.71893200 |
| C | -3.39383500 | 4.31322700  | 0.02361200  |
| H | -1.61893400 | 3.12565500  | 0.33383800  |
| C | -5.35506600 | 3.10256500  | -0.70122000 |
| H | -5.10850200 | 0.98844800  | -0.99044300 |
| C | -4.74207900 | 4.30363300  | -0.33331600 |
| H | -2.91575400 | 5.24044200  | 0.32788400  |
| H | -6.40871200 | 3.08598700  | -0.96765100 |
| H | -5.31804300 | 5.22524700  | -0.31613800 |
| C | -3.37717400 | -0.92040100 | 0.22767000  |
| C | -4.07245700 | -1.84153900 | -0.57171700 |
| C | -3.53500600 | -0.97714500 | 1.62418200  |
| C | -4.90771900 | -2.79875300 | 0.01021500  |
| H | -3.97373900 | -1.82467200 | -1.65194400 |
| C | -4.37432200 | -1.93136200 | 2.19842300  |
| H | -2.99104600 | -0.27627800 | 2.25176700  |
| C | -5.06146400 | -2.84560300 | 1.39562300  |
| H | -5.43713700 | -3.50534900 | -0.62381500 |
| H | -4.48835600 | -1.96086600 | 3.27886100  |
| H | -5.71226700 | -3.58970700 | 1.84752700  |

## TS1-C

Cartesian coordinates

| ATOM | X           | Y          | Z           |
|------|-------------|------------|-------------|
| C    | -1.28968800 | 1.33342300 | -0.94307100 |

|    |             |             |             |
|----|-------------|-------------|-------------|
| O  | -1.52001200 | 0.81559900  | -2.02509800 |
| Rh | 0.10461100  | 0.24933400  | 0.28243200  |
| C  | -1.89733100 | 0.44841500  | 0.56296900  |
| C  | -3.07415100 | 0.46427200  | 0.93513600  |
| C  | -4.42885500 | 0.51961400  | 1.35688100  |
| C  | -4.80718600 | 1.34347900  | 2.43979000  |
| C  | -5.42022800 | -0.24233700 | 0.70073700  |
| C  | -6.13541300 | 1.39974500  | 2.85105600  |
| H  | -4.04487600 | 1.92652000  | 2.94704900  |
| C  | -6.74682700 | -0.17490100 | 1.11647800  |
| H  | -5.13107500 | -0.87762300 | -0.13009300 |
| C  | -7.10856500 | 0.64322200  | 2.19101200  |
| H  | -6.41442800 | 2.03537600  | 3.68706400  |
| H  | -7.50283700 | -0.76269700 | 0.60254800  |
| H  | -8.14537000 | 0.69105600  | 2.51333500  |
| C  | -1.34322400 | 2.83032200  | -0.78545000 |
| C  | -1.50013600 | 3.49637500  | 0.43653000  |
| C  | -1.25289900 | 3.58078100  | -1.97148600 |
| C  | -1.56077900 | 4.88920900  | 0.46957300  |
| H  | -1.55234700 | 2.92603800  | 1.35421500  |
| C  | -1.30226900 | 4.97244300  | -1.93194200 |
| H  | -1.15302300 | 3.05623400  | -2.91559600 |
| C  | -1.45716700 | 5.63139000  | -0.70930000 |
| H  | -1.68197000 | 5.39487700  | 1.42358600  |
| H  | -1.22724200 | 5.54159200  | -2.85493000 |

|    |             |             |             |
|----|-------------|-------------|-------------|
| H  | -1.50035600 | 6.71715100  | -0.67622800 |
| P  | 2.41336700  | 0.33888300  | -0.33422800 |
| P  | -0.19865900 | -1.67585800 | -0.98572900 |
| Cl | 0.62560300  | 1.68934900  | 2.20325400  |
| C  | 2.19555400  | -1.55416400 | -2.54965900 |
| H  | 2.59693400  | -2.34977900 | -1.91142800 |
| H  | 2.59330400  | -1.74441700 | -3.55558200 |
| C  | 0.66398700  | -1.67826200 | -2.63228500 |
| H  | 0.39794500  | -2.59618700 | -3.16898000 |
| H  | 0.24263800  | -0.83754400 | -3.19411900 |
| C  | 2.72763400  | -0.18230900 | -2.09990200 |
| H  | 3.80499700  | -0.11676500 | -2.29330700 |
| H  | 2.26349800  | 0.60800400  | -2.70318300 |
| C  | 0.52623000  | -3.13421400 | -0.11377700 |
| C  | 0.69153100  | -4.37179300 | -0.75966000 |
| C  | 0.89799300  | -3.01949200 | 1.23278900  |
| C  | 1.22998000  | -5.46130900 | -0.07694400 |
| H  | 0.38815800  | -4.49258200 | -1.79622100 |
| C  | 1.43284800  | -4.11337600 | 1.91858300  |
| H  | 0.76800900  | -2.07086100 | 1.74763200  |
| C  | 1.60271600  | -5.33316700 | 1.26444000  |
| H  | 1.35436400  | -6.41158500 | -0.58954500 |
| H  | 1.72069800  | -4.00488900 | 2.96027700  |
| H  | 2.02136700  | -6.18370200 | 1.79584400  |
| C  | -1.89088200 | -2.29260300 | -1.39006700 |

|   |             |             |             |
|---|-------------|-------------|-------------|
| C | -2.51627700 | -1.99969100 | -2.61111200 |
| C | -2.57616900 | -3.07933400 | -0.45055000 |
| C | -3.78847300 | -2.50097700 | -2.89266400 |
| H | -2.02615500 | -1.36485700 | -3.33901400 |
| C | -3.84892600 | -3.57561800 | -0.73220700 |
| H | -2.11347900 | -3.31333300 | 0.50304500  |
| C | -4.45751000 | -3.29219400 | -1.95730000 |
| H | -4.25639800 | -2.26777700 | -3.84540900 |
| H | -4.36247300 | -4.18585600 | 0.00588700  |
| H | -5.44619400 | -3.68463800 | -2.18060000 |
| C | 3.58503000  | -0.65936400 | 0.68574800  |
| C | 4.55618100  | -1.51483300 | 0.14378000  |
| C | 3.49109900  | -0.53834300 | 2.08409800  |
| C | 5.41426900  | -2.23587000 | 0.97852200  |
| H | 4.65713100  | -1.62908400 | -0.93086500 |
| C | 4.35497500  | -1.25384100 | 2.91270600  |
| H | 2.74014900  | 0.12047400  | 2.51357800  |
| C | 5.31672900  | -2.10616900 | 2.36383600  |
| H | 6.15863900  | -2.89671800 | 0.54191400  |
| H | 4.27472300  | -1.14403700 | 3.99103500  |
| H | 5.98624600  | -2.66530500 | 3.01227900  |
| C | 3.19900000  | 2.00966100  | -0.37324800 |
| C | 2.40052100  | 3.15795300  | -0.44701300 |
| C | 4.59626100  | 2.14383000  | -0.40304200 |
| C | 2.98948700  | 4.41868100  | -0.56259300 |

|   |            |            |             |
|---|------------|------------|-------------|
| H | 1.32274200 | 3.06898000 | -0.39315000 |
| C | 5.18170800 | 3.40522700 | -0.51288900 |
| H | 5.23106300 | 1.26562700 | -0.32677400 |
| C | 4.37861100 | 4.54526900 | -0.59513700 |
| H | 2.35544700 | 5.29935000 | -0.61443600 |
| H | 6.26470800 | 3.49689900 | -0.52801400 |
| H | 4.83582800 | 5.52804900 | -0.67663900 |

## TS2-C

Cartesian coordinates

| ATOM | X           | Y           | Z           |
|------|-------------|-------------|-------------|
| C    | 0.26147000  | 0.79279300  | 2.61481600  |
| O    | 0.61330700  | 1.39436000  | 3.54648300  |
| C    | -1.40867000 | -0.17331000 | 2.63755400  |
| C    | -1.51648200 | 2.33294700  | -0.49285900 |
| Cl   | 1.45643700  | -1.89007800 | 1.92868800  |
| C    | -2.23536500 | 3.38123100  | -1.15029500 |
| C    | -3.50420700 | 3.14188700  | -1.71816000 |
| C    | -1.69018500 | 4.67809500  | -1.25130400 |
| C    | -4.19939900 | 4.16427100  | -2.36034500 |
| H    | -3.93281100 | 2.14613600  | -1.64834400 |
| C    | -2.39147900 | 5.69542700  | -1.89472400 |
| H    | -0.71209200 | 4.87249700  | -0.82077200 |
| C    | -3.64838200 | 5.44512400  | -2.45162300 |
| H    | -5.17626700 | 3.96030300  | -2.79157100 |

|    |             |             |             |
|----|-------------|-------------|-------------|
| H  | -1.95474400 | 6.68867200  | -1.96187900 |
| H  | -4.19330400 | 6.24080200  | -2.95246700 |
| C  | -0.90153700 | 1.42583600  | 0.05559200  |
| C  | -1.47067700 | -1.35985900 | 3.38287500  |
| C  | -2.49034300 | 0.72168500  | 2.67337200  |
| C  | -2.61952100 | -1.66288600 | 4.11793600  |
| H  | -0.62315000 | -2.03617100 | 3.38635700  |
| C  | -3.62999400 | 0.41865800  | 3.41883300  |
| H  | -2.43920100 | 1.65236000  | 2.11784700  |
| C  | -3.70006900 | -0.77865000 | 4.13597800  |
| H  | -2.66579100 | -2.59146300 | 4.68170300  |
| H  | -4.46135600 | 1.11910600  | 3.44124400  |
| H  | -4.58925400 | -1.01598500 | 4.71459500  |
| P  | 1.96416000  | 0.71120000  | -0.39678800 |
| P  | -0.77300200 | -1.50510300 | -0.93328100 |
| Rh | 0.12262200  | -0.06034900 | 0.92565300  |
| C  | 0.92733000  | -0.28158300 | -2.93604000 |
| H  | 1.58256700  | -1.15216300 | -2.82523900 |
| H  | 0.93980100  | -0.03043000 | -4.00543500 |
| C  | -0.52221900 | -0.66011800 | -2.57592300 |
| H  | -0.94875400 | -1.29492900 | -3.36118600 |
| H  | -1.14290900 | 0.24052400  | -2.52450000 |
| C  | 1.51560100  | 0.93217100  | -2.19009300 |
| H  | 2.41223200  | 1.28949800  | -2.71015300 |
| H  | 0.79522200  | 1.75621400  | -2.19451800 |

|   |             |             |             |
|---|-------------|-------------|-------------|
| C | -2.59954700 | -1.80902600 | -0.98740000 |
| C | -3.13366600 | -2.90698600 | -1.68241200 |
| C | -3.47830700 | -0.90904400 | -0.36642200 |
| C | -4.51416600 | -3.09481400 | -1.75865900 |
| H | -2.47245800 | -3.62412200 | -2.15868300 |
| C | -4.85950800 | -1.10112100 | -0.44354000 |
| H | -3.08318100 | -0.05892900 | 0.17515000  |
| C | -5.38122800 | -2.19257900 | -1.13907100 |
| H | -4.91056200 | -3.95097200 | -2.29839200 |
| H | -5.52518200 | -0.39895000 | 0.05142500  |
| H | -6.45620700 | -2.34334500 | -1.19411200 |
| C | -0.08982800 | -3.20162000 | -1.16400900 |
| C | 0.38105600  | -3.68573700 | -2.39497400 |
| C | -0.08149600 | -4.06350900 | -0.05432300 |
| C | 0.85422700  | -4.99486500 | -2.51252800 |
| H | 0.37507800  | -3.05474200 | -3.27738300 |
| C | 0.38187100  | -5.37267700 | -0.17641800 |
| H | -0.42283200 | -3.70320400 | 0.90906000  |
| C | 0.85546700  | -5.84110200 | -1.40370000 |
| H | 1.21660900  | -5.35068300 | -3.47350600 |
| H | 0.38344000  | -6.02315200 | 0.69377000  |
| H | 1.22393600  | -6.85944400 | -1.49480500 |
| C | 2.57126100  | 2.41103100  | 0.02511800  |
| C | 3.82880100  | 2.83545700  | -0.43828000 |
| C | 1.78928800  | 3.30506700  | 0.76989400  |



|   |            |             |             |
|---|------------|-------------|-------------|
| C | 4.28874400 | 4.12357400  | -0.16561100 |
| H | 4.45946400 | 2.15491600  | -1.00208500 |
| C | 2.25489400 | 4.59288900  | 1.04568400  |
| H | 0.81200100 | 3.00240700  | 1.12312500  |
| C | 3.50346800 | 5.00545400  | 0.57981300  |
| H | 5.26474600 | 4.43377400  | -0.52929400 |
| H | 1.63934000 | 5.26919800  | 1.63269000  |
| H | 3.86587800 | 6.00610400  | 0.79994300  |
| C | 3.53409700 | -0.25187400 | -0.39613100 |
| C | 4.14057700 | -0.72809400 | -1.56801300 |
| C | 4.17666200 | -0.47045400 | 0.83455000  |
| C | 5.35929300 | -1.40981600 | -1.51203800 |
| H | 3.68086100 | -0.56676400 | -2.53665100 |
| C | 5.39632400 | -1.14149300 | 0.88603000  |
| H | 3.71743000 | -0.12522600 | 1.75379600  |
| C | 5.98947400 | -1.61719700 | -0.28593500 |
| H | 5.81325000 | -1.77288300 | -2.43027000 |
| H | 5.87785200 | -1.30240100 | 1.84642600  |
| H | 6.93731700 | -2.14696100 | -0.24207700 |

### TS3-C

Cartesian coordinates

| ATOM | X           | Y          | Z           |
|------|-------------|------------|-------------|
| C    | 0.27823400  | 2.40695100 | -0.36326400 |
| C    | -1.38274900 | 1.41670000 | -0.30562100 |

|    |             |             |             |
|----|-------------|-------------|-------------|
| C  | -2.54023200 | 1.82394800  | -0.40976100 |
| Rh | 0.22428700  | 0.21344200  | -0.07327300 |
| Cl | 0.12945300  | 0.40754700  | 2.37978000  |
| C  | -3.86137500 | 2.33333800  | -0.49344300 |
| C  | -4.46671400 | 2.59600300  | -1.74353800 |
| C  | -4.60970300 | 2.58943500  | 0.67911800  |
| C  | -5.76474500 | 3.09373800  | -1.81418300 |
| H  | -3.90078700 | 2.40781000  | -2.65142100 |
| C  | -5.90602200 | 3.08897400  | 0.59706500  |
| H  | -4.15431400 | 2.38815500  | 1.64379200  |
| C  | -6.49233400 | 3.34331300  | -0.64690400 |
| H  | -6.21133700 | 3.29075400  | -2.78569300 |
| H  | -6.46396400 | 3.28245100  | 1.50996500  |
| H  | -7.50507300 | 3.73289100  | -0.70577100 |
| C  | 0.33394000  | -0.12289100 | -1.89775000 |
| C  | 0.58930000  | 2.92770300  | -1.63719900 |
| C  | 0.45804500  | 3.24471500  | 0.75491800  |
| C  | 1.08412500  | 4.22435900  | -1.78134200 |
| H  | 0.41856300  | 2.33583600  | -2.53051600 |
| C  | 0.94928700  | 4.54080200  | 0.60011700  |
| H  | 0.19525300  | 2.88014900  | 1.74063900  |
| C  | 1.27378200  | 5.04020600  | -0.66399100 |
| H  | 1.31452700  | 4.59727800  | -2.77694000 |
| H  | 1.07377400  | 5.16732300  | 1.48068700  |
| H  | 1.65555800  | 6.05119900  | -0.77753300 |

|   |             |             |             |
|---|-------------|-------------|-------------|
| P | 2.56431200  | -0.64595600 | 0.18828400  |
| P | -0.93540100 | -1.99587700 | 0.40243300  |
| O | 0.39999900  | -0.35643500 | -3.02335600 |
| C | 1.51881000  | -2.89213100 | 1.66269600  |
| H | 1.35014400  | -2.09604600 | 2.39517300  |
| H | 1.92731100  | -3.74809700 | 2.21453500  |
| C | 0.18503100  | -3.35300000 | 1.03916300  |
| H | -0.37751700 | -3.95672300 | 1.75967300  |
| H | 0.40281000  | -4.00450000 | 0.18493800  |
| C | 2.57555500  | -2.46100400 | 0.61915500  |
| H | 3.57613800  | -2.73108100 | 0.97208400  |
| H | 2.41143100  | -3.01315300 | -0.31421900 |
| C | -1.82085900 | -2.78657700 | -1.01705100 |
| C | -2.40181600 | -1.96180000 | -1.99449000 |
| C | -1.97713400 | -4.17791900 | -1.13323800 |
| C | -3.11090200 | -2.51418100 | -3.06310900 |
| H | -2.31436900 | -0.88228500 | -1.91183400 |
| C | -2.67637500 | -4.72858300 | -2.20786700 |
| H | -1.56629800 | -4.84314500 | -0.37999000 |
| C | -3.24361800 | -3.89840100 | -3.17675400 |
| H | -3.55489400 | -1.85934100 | -3.80785600 |
| H | -2.78351700 | -5.80753200 | -2.28299300 |
| H | -3.78889900 | -4.32855300 | -4.01245400 |
| C | -2.27602600 | -1.86711400 | 1.65903400  |
| C | -2.05331800 | -2.18315600 | 3.00788600  |

|   |             |             |             |
|---|-------------|-------------|-------------|
| C | -3.53564600 | -1.37853100 | 1.27799000  |
| C | -3.07496000 | -2.04093400 | 3.94715900  |
| H | -1.07898200 | -2.52420700 | 3.34098700  |
| C | -4.55210500 | -1.22879000 | 2.22116800  |
| H | -3.73189400 | -1.11425600 | 0.24483500  |
| C | -4.32710900 | -1.56404600 | 3.55742700  |
| H | -2.88511200 | -2.29356000 | 4.98693500  |
| H | -5.51933200 | -0.84663800 | 1.90652700  |
| H | -5.12058500 | -1.44941000 | 4.29112900  |
| C | 3.71962900  | 0.11033100  | 1.41943800  |
| C | 3.39227800  | 1.31306000  | 2.05808700  |
| C | 4.97215100  | -0.47574000 | 1.66976700  |
| C | 4.29480500  | 1.90671800  | 2.94472900  |
| H | 2.43237800  | 1.77735500  | 1.87391700  |
| C | 5.86748500  | 0.11566600  | 2.55893300  |
| H | 5.26744300  | -1.38642700 | 1.15542600  |
| C | 5.52770000  | 1.30898400  | 3.20218700  |
| H | 4.02502500  | 2.83728400  | 3.43647900  |
| H | 6.83173400  | -0.35057800 | 2.74357700  |
| H | 6.22544800  | 1.77105300  | 3.89566900  |
| C | 3.58758800  | -0.55616400 | -1.35081800 |
| C | 3.67544700  | 0.69233700  | -1.99192300 |
| C | 4.28541300  | -1.64370500 | -1.89724300 |
| C | 4.44475200  | 0.84657100  | -3.14416800 |
| H | 3.13520800  | 1.54663300  | -1.59189900 |

|   |            |             |             |
|---|------------|-------------|-------------|
| C | 5.04945000 | -1.48791400 | -3.05679100 |
| H | 4.24700700 | -2.62084500 | -1.42644100 |
| C | 5.13251300 | -0.24402900 | -3.68200500 |
| H | 4.50165200 | 1.81941800  | -3.62489200 |
| H | 5.58113800 | -2.34224000 | -3.46760500 |
| H | 5.72761100 | -0.12464200 | -4.58329200 |
